# Supplementary material for: Transition-metal-free electrochemical oxidative C(sp2)–H trifluoromethylation of aryl aldehyde hydrazones
Source: Royal Society of Chemistry journal article supplement (doi:10.1039/d2ob01734b), 2022-01-01
Supplement: d2ob01734b1.pdf [file d2ob01734b1.pdf]

Supporting Information for

## Transition-Metal-Free Electrochemical Oxidative C(sp<sup>2</sup>)-H

### Trifluoromethylation of Hydrazones

Yuan Shi<sup>a</sup>, Kai Wang<sup>b</sup>, Yuxin Ding<sup>a</sup>, Yuanyuan Xie<sup>a,b\*</sup>

<sup>a</sup> College of Pharmaceutical Science, Zhejiang University of Technology, Hangzhou, 310014, China.

<sup>b</sup> Collaborative Innovation Center of Yangtze River Delta Region Green Pharmaceuticals, Zhejiang University of Technology, Hangzhou, 310014, China.

E-mail: xyycz@zjut.edu.cn (Y. Xie).

#### Table for Contents

|                                               |           |
|-----------------------------------------------|-----------|
| <b>General information</b> .....              | <b>1</b>  |
| <b>Experimental Section</b> .....             | <b>3</b>  |
| <b>Characterization of the products</b> ..... | <b>4</b>  |
| <b>Copies of NMR spectra</b> .....            | <b>14</b> |

## General information

All reactions were carried out in dried sealed Schlenk tubes with magnetic stirring. All anhydrous and oxygen-free environments were performed under argon atmosphere in oven-dried glassware using Schlenk techniques. All the chemicals were obtained commercially and used without any prior purification. All products were isolated by short chromatography on a silica gel (200-300 mesh) column using hexane and ethyl acetate.  $^1\text{H}$ ,  $^{13}\text{C}$  and  $^{19}\text{F}$  NMR spectra were recorded on a Bruker Advance 400 spectrometer at ambient temperature with  $\text{CDCl}_3$  as solvent and tetramethylsilane (TMS) as the internal standard. Analytical thin layer chromatography (TLC) was performed on Merk precoated TLC (silica gel 60 F254) plates.

## Optimized reaction conditions:

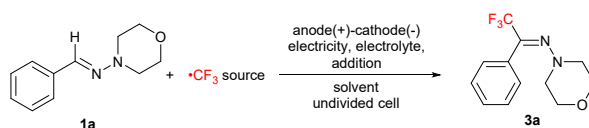

| Entry             | electrode     | electricity | Solvent                             | $\cdot\text{CF}_3$ source         | electrolyte                 | addition | atmosphere | Temperature( $^{\circ}\text{C}$ ) | Yield(%) <sup>b</sup> |
|-------------------|---------------|-------------|-------------------------------------|-----------------------------------|-----------------------------|----------|------------|-----------------------------------|-----------------------|
| 1                 | C(+)-Pt(-)    | 8mA         | MeCN                                | $\text{CF}_3\text{SO}_2\text{Na}$ | $^t\text{Bu}_4\text{NBF}_4$ | none     | air        | 50                                | 32                    |
| 2                 | C(+)-C(-)     | 8mA         | MeCN                                | $\text{CF}_3\text{SO}_2\text{Na}$ | $^t\text{Bu}_4\text{NBF}_4$ | none     | air        | 50                                | 45                    |
| 3                 | C(+)-Ni(-)    | 8mA         | MeCN                                | $\text{CF}_3\text{SO}_2\text{Na}$ | $^t\text{Bu}_4\text{NBF}_4$ | none     | air        | 50                                | 32                    |
| 4 <sup>[c]</sup>  | C(+)-Ni(-)    | 8mA         | MeCN                                | $\text{CF}_3\text{SO}_2\text{Na}$ | $^t\text{Bu}_4\text{NBF}_4$ | none     | air        | 50                                | 37                    |
| 5                 | Pt(+)-Pt(-)   | 8mA         | MeCN                                | $\text{CF}_3\text{SO}_2\text{Na}$ | $^t\text{Bu}_4\text{NBF}_4$ | none     | air        | 50                                | 37                    |
| 6                 | RVC(+)-Pt(-)  | 8mA         | MeCN                                | $\text{CF}_3\text{SO}_2\text{Na}$ | $^t\text{Bu}_4\text{NBF}_4$ | none     | air        | 50                                | 40                    |
| 7                 | RVC(+)-Ni(-)  | 8mA         | MeCN                                | $\text{CF}_3\text{SO}_2\text{Na}$ | $^t\text{Bu}_4\text{NBF}_4$ | none     | air        | 50                                | 37                    |
| 8                 | C(+)-Cu(-)    | 8mA         | MeCN                                | $\text{CF}_3\text{SO}_2\text{Na}$ | $^t\text{Bu}_4\text{NBF}_4$ | none     | air        | 50                                | 20                    |
| 9                 | C(+)-Fe(-)    | 8mA         | MeCN                                | $\text{CF}_3\text{SO}_2\text{Na}$ | $^t\text{Bu}_4\text{NBF}_4$ | none     | air        | 50                                | 40                    |
| 10                | RVC(+)-RVC(-) | 8mA         | MeCN                                | $\text{CF}_3\text{SO}_2\text{Na}$ | $^t\text{Bu}_4\text{NBF}_4$ | none     | air        | 50                                | 42                    |
| 11 <sup>[d]</sup> | C(+)-C(-)     | 3mA         | MeCN                                | $\text{CF}_3\text{SO}_2\text{Na}$ | $^t\text{Bu}_4\text{NBF}_4$ | none     | Air        | 50                                | 34                    |
| 12 <sup>[d]</sup> | C(+)-C(-)     | 5mA         | MeCN                                | $\text{CF}_3\text{SO}_2\text{Na}$ | $^t\text{Bu}_4\text{NBF}_4$ | none     | Air        | 50                                | 47                    |
| 13                | C(+)-C(-)     | 12mA        | MeCN                                | $\text{CF}_3\text{SO}_2\text{Na}$ | $^t\text{Bu}_4\text{NBF}_4$ | none     | Air        | 50                                | 36                    |
| 14                | C(+)-C(-)     | 0mA         | MeCN                                | $\text{CF}_3\text{SO}_2\text{Na}$ | $^t\text{Bu}_4\text{NBF}_4$ | none     | Air        | 50                                | N.D.                  |
| 15                | C(+)-C(-)     | 8mA         | HFIP                                | $\text{CF}_3\text{SO}_2\text{Na}$ | $^t\text{Bu}_4\text{NBF}_4$ | none     | Air        | 50                                | 35                    |
| 16                | C(+)-C(-)     | 8mA         | DMF                                 | $\text{CF}_3\text{SO}_2\text{Na}$ | $^t\text{Bu}_4\text{NBF}_4$ | none     | Air        | 50                                | Trace                 |
| 17                | C(+)-C(-)     | 8mA         | MeCN: $\text{H}_2\text{O}$<br>= 1:1 | $\text{CF}_3\text{SO}_2\text{Na}$ | $^t\text{Bu}_4\text{NBF}_4$ | none     | Air        | 50                                | 33                    |
| 18                | C(+)-C(-)     | 8mA         | MeCN: $\text{H}_2\text{O}$<br>= 3:1 | $\text{CF}_3\text{SO}_2\text{Na}$ | $^t\text{Bu}_4\text{NBF}_4$ | none     | Air        | 50                                | 35                    |
| 19                | C(+)-C(-)     | 8mA         | MeCN:<br>MeOH= 1:1                  | $\text{CF}_3\text{SO}_2\text{Na}$ | $^t\text{Bu}_4\text{NBF}_4$ | none     | Air        | 50                                | trace                 |
| 20                | C(+)-C(-)     | 8mA         | acetone                             | $\text{CF}_3\text{SO}_2\text{Na}$ | $^t\text{Bu}_4\text{NBF}_4$ | none     | Air        | 50                                | trace                 |
| 21                | C(+)-C(-)     | 8mA         | DCE                                 | $\text{CF}_3\text{SO}_2\text{Na}$ | $^t\text{Bu}_4\text{NBF}_4$ | none     | Air        | 50                                | 35                    |
| 22                | C(+)-C(-)     | 8mA         | HFIP: DCE<br>= 1:1                  | $\text{CF}_3\text{SO}_2\text{Na}$ | $^t\text{Bu}_4\text{NBF}_4$ | none     | Air        | 50                                | 27                    |

|                   |           |     |                   |                                    |                                               |                    |                |      |    |
|-------------------|-----------|-----|-------------------|------------------------------------|-----------------------------------------------|--------------------|----------------|------|----|
| 23                | C(+)-C(-) | 8mA | TFA: H2O<br>=10:1 | CF <sub>3</sub> SO <sub>2</sub> Na | <sup>n</sup> Bu <sub>4</sub> NBF <sub>4</sub> | none               | Air            | 50   | 15 |
| 24 <sup>[e]</sup> | C(+)-C(-) | 8mA | MeCN              | Togni reagent                      | <sup>n</sup> Bu <sub>4</sub> NBF <sub>4</sub> | none               | Air            | 50   | 71 |
| 25 <sup>[e]</sup> | C(+)-C(-) | 8mA | MeCN              | Togni reagent                      | <sup>n</sup> Bu <sub>4</sub> NPF <sub>6</sub> | none               | Air            | 50   | 65 |
| 26                | C(+)-C(-) | 8mA | MeCN              | Togni reagent                      | LiClO <sub>4</sub>                            | none               | Air            | 50   | 22 |
| 27                | C(+)-C(-) | 8mA | MeCN              | Togni reagent                      | NH <sub>4</sub> BF <sub>4</sub>               | none               | Air            | 50   | 42 |
| 28 <sup>[e]</sup> | C(+)-C(-) | 8mA | MeCN              | Togni reagent                      | Et <sub>3</sub> NBr                           | none               | Air            | 50   | 60 |
| 29                | C(+)-C(-) | 8mA | MeCN              | Togni reagent                      | <sup>n</sup> Bu <sub>4</sub> NBF <sub>4</sub> | NaHCO <sub>3</sub> | Air            | 50   | 72 |
| 30                | C(+)-C(-) | 8mA | MeCN              | Togni reagent                      | <sup>n</sup> Bu <sub>4</sub> NBF <sub>4</sub> | NaOH               | Air            | 50   | 42 |
| 31 <sup>[e]</sup> | C(+)-C(-) | 8mA | MeCN              | Togni reagent                      | <sup>n</sup> Bu <sub>4</sub> NBF <sub>4</sub> | NaOAc              | Air            | 50   | 80 |
| 32                | C(+)-C(-) | 8mA | MeCN              | Togni reagent                      | <sup>n</sup> Bu <sub>4</sub> NBF <sub>4</sub> | KOH                | Air            | 50   | 30 |
| 33                | C(+)-C(-) | 8mA | MeCN              | Togni reagent                      | <sup>n</sup> Bu <sub>4</sub> NBF <sub>4</sub> | HOAc               | Air            | 50   | 34 |
| 34 <sup>[e]</sup> | C(+)-C(-) | 8mA | MeCN              | Togni reagent                      | <sup>n</sup> Bu <sub>4</sub> NBF <sub>4</sub> | NaOAc              | N <sub>2</sub> | 50   | 85 |
| 35 <sup>[e]</sup> | C(+)-C(-) | 8mA | MeCN              | Togni reagent                      | <sup>n</sup> Bu <sub>4</sub> NBF <sub>4</sub> | NaOAc              | N <sub>2</sub> | r.t. | 64 |
| 36 <sup>[e]</sup> | C(+)-C(-) | 8mA | MeCN              | Togni reagent                      | <sup>n</sup> Bu <sub>4</sub> NBF <sub>4</sub> | NaOAc              | N <sub>2</sub> | 70°C | 82 |

<sup>[a]</sup>Reaction conditions : 1 (0.3 mmol) , 3 (1.5 eq.), electrolyte (0.3 eq.), solvent (4 mL) ,constant current electricity, stirred, 2 h.

<sup>[b]</sup>Isolated yield. <sup>[c]</sup>Nickel foam. <sup>[d]</sup>4 h. <sup>[e]</sup>1 h.

### Optimized reaction conditions: substrates with para-electron-withdrawing groups

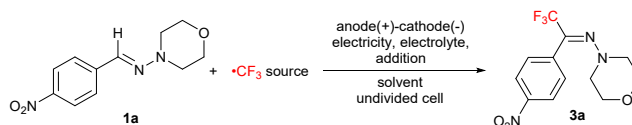

| Entry             | electrode     | electricity | Solvent | •CF <sub>3</sub> source            | electrolyte                                   | addition           | atmosphere     | Temperature(°C) | Yield(%) <sup>[e]</sup> |
|-------------------|---------------|-------------|---------|------------------------------------|-----------------------------------------------|--------------------|----------------|-----------------|-------------------------|
| 1                 | C(+)-C(-)     | 8mA         | MeCN    | Togni reagent                      | <sup>n</sup> Bu <sub>4</sub> NBF <sub>4</sub> | NaOAc              | N <sub>2</sub> | 50              | 48                      |
| 2                 | C(+)-Pt(-)    | 8mA         | MeCN    | Togni reagent                      | <sup>n</sup> Bu <sub>4</sub> NBF <sub>4</sub> | NaOAc              | N <sub>2</sub> | 50              | 42                      |
| 3                 | C(+)-Ni(-)    | 8mA         | MeCN    | Togni reagent                      | <sup>n</sup> Bu <sub>4</sub> NBF <sub>4</sub> | NaOAc              | N <sub>2</sub> | 50              | 40                      |
| 4 <sup>[e]</sup>  | C(+)-Ni(-)    | 8mA         | MeCN    | Togni reagent                      | <sup>n</sup> Bu <sub>4</sub> NBF <sub>4</sub> | NaOAc              | N <sub>2</sub> | 50              | 42                      |
| 5                 | RVC(+)- Pt(-) | 8mA         | MeCN    | Togni reagent                      | <sup>n</sup> Bu <sub>4</sub> NBF <sub>4</sub> | NaOAc              | N <sub>2</sub> | 50              | 42                      |
| 6                 | C(+)-C(-)     | 10mA        | MeCN    | Togni reagent                      | <sup>n</sup> Bu <sub>4</sub> NBF <sub>4</sub> | NaOAc              | N <sub>2</sub> | 50              | 48                      |
| 7                 | C(+)-C(-)     | 8mA         | Acetone | Togni reagent                      | <sup>n</sup> Bu <sub>4</sub> NBF <sub>4</sub> | NaOAc              | N <sub>2</sub> | 50              | trace                   |
| 8                 | C(+)-C(-)     | 8mA         | Toluene | Togni reagent                      | <sup>n</sup> Bu <sub>4</sub> NBF <sub>4</sub> | NaOAc              | N <sub>2</sub> | 50              | N.R.                    |
| 9                 | C(+)-C(-)     | 8mA         | DMF     | Togni reagent                      | <sup>n</sup> Bu <sub>4</sub> NBF <sub>4</sub> | NaOAc              | N <sub>2</sub> | 50              | 30                      |
| <sup>[b]</sup> 10 | C(+)-C(-)     | 8mA         | MeCN    | CF <sub>3</sub> SO <sub>2</sub> Na | <sup>n</sup> Bu <sub>4</sub> NBF <sub>4</sub> | NaOAc              | N <sub>2</sub> | 50              | 87                      |
| <sup>[b]</sup> 11 | C(+)-C(-)     | 8mA         | MeCN    | CF <sub>3</sub> SO <sub>2</sub> Na | KF                                            | NaOAc              | N <sub>2</sub> | 50              | 25                      |
| <sup>[b]</sup> 12 | C(+)-C(-)     | 8mA         | MeCN    | CF <sub>3</sub> SO <sub>2</sub> Na | <sup>n</sup> Bu <sub>4</sub> NPF <sub>6</sub> | NaOAc              | N <sub>2</sub> | 50              | 84                      |
| <sup>[b]</sup> 13 | C(+)-C(-)     | 8mA         | MeCN    | CF <sub>3</sub> SO <sub>2</sub> Na | LiClO <sub>4</sub>                            | NaOAc              | N <sub>2</sub> | 50              | 42                      |
| <sup>[b]</sup> 14 | C(+)-C(-)     | 8mA         | MeCN    | CF <sub>3</sub> SO <sub>2</sub> Na | <sup>n</sup> Bu <sub>4</sub> NBF <sub>4</sub> | None               | N <sub>2</sub> | 50              | 65                      |
| <sup>[b]</sup> 15 | C(+)-C(-)     | 8mA         | MeCN    | CF <sub>3</sub> SO <sub>2</sub> Na | <sup>n</sup> Bu <sub>4</sub> NBF <sub>4</sub> | NaOH               | N <sub>2</sub> | 50              | 66                      |
| <sup>[b]</sup> 16 | C(+)-C(-)     | 8mA         | MeCN    | CF <sub>3</sub> SO <sub>2</sub> Na | <sup>n</sup> Bu <sub>4</sub> NBF <sub>4</sub> | NaHCO <sub>3</sub> | N <sub>2</sub> | 50              | 75                      |

<sup>[a]</sup>Reaction conditions : 1 (0.3 mmol) , 3 (1.5 eq.), electrolyte (0.3 eq.), solvent (4 mL) ,constant current electricity, stirred, 1 h. <sup>[b]</sup>2h

<sup>[c]</sup>Isolated yield.

## Experimental Section

### General procedure for the synthesis of compounds 1

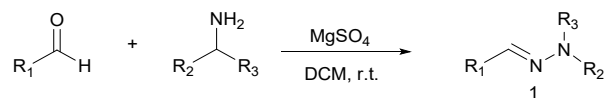

A mixture of hydrazine (2.4 mmol), aldehyde (2.0 mmol) and anhydrous  $\text{MgSO}_4$  (2.0 mmol) in  $\text{CH}_2\text{Cl}_2$  (10 mL) was stirred at room temperature in 6h. After filtration of  $\text{MgSO}_4$ ,  $\text{CH}_2\text{Cl}_2$  was removed under reduced pressure and the mixture was subjected to recrystallize to give the desired product 1 with almost quantitative yields.

### General procedure for the synthesis of Togni reagent (2b)

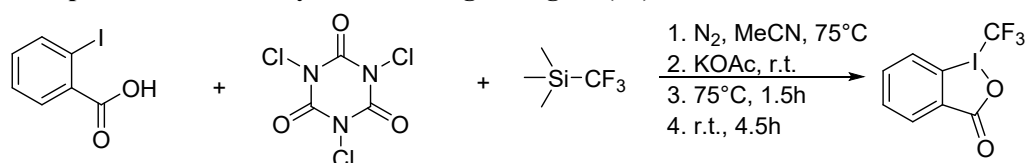

Add ortho-iodobenzoic acid (3.47 g, 14 mmol, 1.0 eq) into a 100mL three-neck flask in nitrogen atmosphere, add 30mL acetonitrile, heat to  $75^\circ\text{C}$ , then add trichloroisocyanuric acid (0.974 g, 4.74 mmol, 0.3 eq) in 5 minutes with a constant pressure drop funnel. After cool to room temperature, add dried potassium acetate (2.75 g, 28 mmol, 2.0 eq) at once. The reaction system was cooled to room temperature after 1.5 hours of reaction at  $75^\circ\text{C}$ . And then,  $\text{TMSCF}_3$  (2.90 mL, 19.6 mmol, 1.4 eq) was added at once for 4.5h in room temperature. After concentration, the product crystallizes and is washed with cold acetonitrile to obtain white solid Togni reagent.

Photo

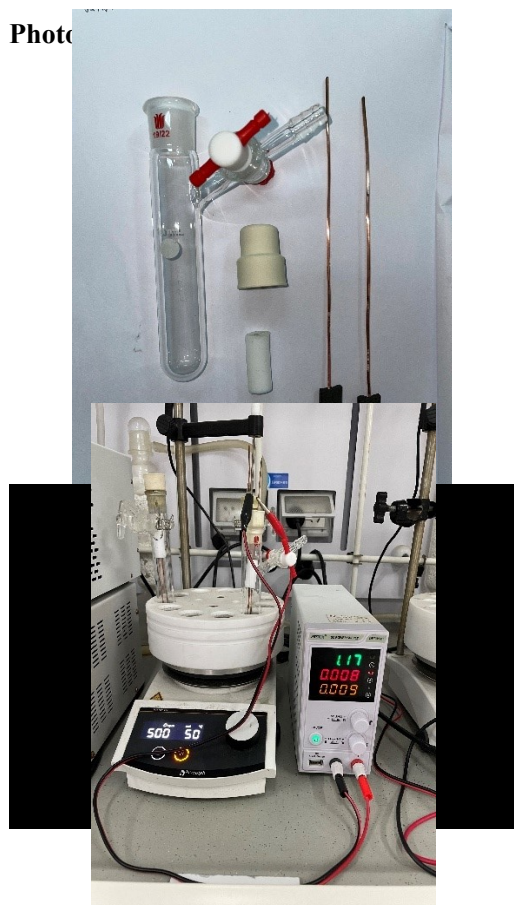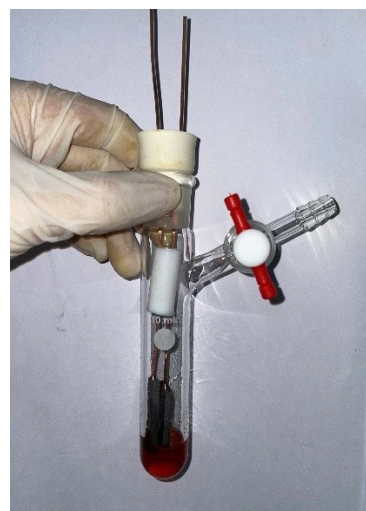

### Cyclic voltammetry studies

The cyclic voltammograms experiments were conducted in a Schlenk tube that contained the substance dissolved in a 0.1 M solution of tetrabutylammonium hexafluorophosphate in acetonitrile. A glassy carbon electrode working electrode, a platinum wire counter electrode and an Ag/AgCl reference electrode were used. The reference electrode was stored in saturated potassium chloride solution for activation before use. The relevant parameters were controlled by an electrochemical workstation CHI600E.

### Characterization of the products

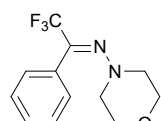

**(E)-2,2,2-trifluoro-N-morpholino-1-phenylethan-1-imine (3a)**

Colorless solid; m.p.= 40.1-41.0°C. <sup>1</sup>H NMR (400 MHz, CDCl<sub>3</sub>) δ 7.85 – 7.28 (m, 5H), 3.88 – 3.37 (m, 4H), 3.20 – 2.55 (m, 4H). <sup>13</sup>C NMR (100 MHz, CDCl<sub>3</sub>) δ 136.35 (q, <sup>2</sup>J<sub>C,F</sub> = 33.84Hz), 131.73, 129.95, 128.95, 128.60, 121.37 (q, <sup>1</sup>J<sub>C,F</sub> = 275.73Hz), 66.22, 54.37. <sup>19</sup>F NMR (376 MHz, CDCl<sub>3</sub>) δ -66.75. Spectroscopic data are in accordance with those described in the literature.<sup>[1]</sup>

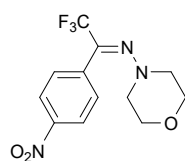

**(E)-2,2,2-trifluoro-N-morpholino-1-(4-nitrophenyl)ethan-1-imine (3b)**

Yellow solid; m.p.= 161.8-163.3 °C. <sup>1</sup>H NMR (400 MHz, CDCl<sub>3</sub>) δ 8.55 – 7.91 (m, 2H), 7.76 – 7.45 (m, 2H), 4.02 – 3.42 (m, 4H), 3.18 – 2.70 (m, 4H). <sup>13</sup>C NMR (100 MHz, CDCl<sub>3</sub>) δ 148.47, 138.28, 132.54 (q, <sup>2</sup>J<sub>C,F</sub> = 34.34 Hz), 129.97, 121.04 (q, <sup>1</sup>J<sub>C,F</sub> = 275.73 Hz), 124.16, 66.07, 54.53. <sup>19</sup>F NMR (376 MHz, CDCl<sub>3</sub>) δ -79.87. Spectroscopic data are in accordance with those described in the literature.<sup>[2]</sup>

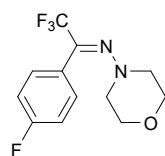

**(E)-2,2,2-trifluoro-1-(4-fluorophenyl)-N-morpholinoethan-1-imine (3c)**

Yellow solid; m.p.= 119.3- 121.4 °C. <sup>1</sup>H NMR (400 MHz, CDCl<sub>3</sub>) δ 7.51 – 7.36 (m, 2H), 7.17 – 7.05 (m, 2H), 3.71 – 3.55 (m, 4H), 3.08 – 2.86 (m, 4H). <sup>13</sup>C NMR (100 MHz, CDCl<sub>3</sub>) δ 163.39 (d, <sup>1</sup>J<sub>C,F</sub> = 252.53Hz), 135.76 (q, <sup>2</sup>J<sub>C,F</sub> = 33.33Hz), 130.73 (d, <sup>3</sup>J<sub>C,F</sub> = 9.09Hz), 127.57 (d, <sup>4</sup>J<sub>C,F</sub> = 4.04Hz), 121.25 (q, <sup>1</sup>J<sub>C,F</sub> = 275.73Hz), 116.27 (d, <sup>2</sup>J<sub>C,F</sub> = 22.22Hz), 66.19, 54.36. <sup>19</sup>F NMR (376 MHz, CDCl<sub>3</sub>) δ -66.86, -109.46. Spectroscopic data are in accordance with those described in the literature.<sup>[3]</sup>

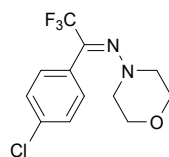

**(E)-1-(4-chlorophenyl)-2,2,2-trifluoro-N-morpholinoethan-1-imine (3d)**

Yellow solid; m.p.= 45.5- 47.0 °C. <sup>1</sup>H NMR (400 MHz, CDCl<sub>3</sub>) δ 7.49 – 7.32 (m, 4H), 3.72 – 3.51 (m, 4H), 3.14 – 2.86 (m, 4H). <sup>13</sup>C NMR (100 MHz, CDCl<sub>3</sub>) δ 136.17, 135.02 (q, <sup>2</sup>J<sub>C,F</sub> = 35.35Hz), 130.03, 129.35, 121.21(q, <sup>1</sup>J<sub>C,F</sub> = 275.73Hz), 66.17, 54.39. <sup>19</sup>F NMR (376 MHz, CDCl<sub>3</sub>) δ -66.23. HRMS (ESI) m/z [M+H]<sup>+</sup> Calculated for C<sub>12</sub>H<sub>12</sub>ClF<sub>3</sub>N<sub>2</sub>O (293.0663), found 293.0668.

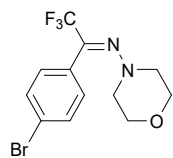

**(E)-1-(4-bromophenyl)-2,2,2-trifluoro-N-morpholinoethan-1-imine (3e)**

Yellow oil. <sup>1</sup>H NMR (400 MHz, CDCl<sub>3</sub>) δ 7.72 (d, *J* = 8.0 Hz, 2H), 7.56 (d, *J* = 8.0 Hz, 2H), 3.63 (t, 4H), 3.00 (t, *J* = 4.9 Hz, 4H). <sup>13</sup>C NMR (100 MHz, CDCl<sub>3</sub>) δ 134.92 (q, <sup>2</sup>J<sub>C,F</sub> = 33.33Hz), 132.31, 130.53, 130.25, 124.43, 121.16 (q, <sup>1</sup>J<sub>C,F</sub> = 275.73Hz), 66.15, 54.39. <sup>19</sup>F NMR (376 MHz, CDCl<sub>3</sub>) δ -66.65. Spectroscopic data are in accordance with those described in the literature.<sup>[1]</sup>

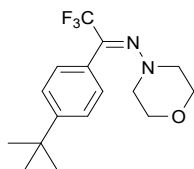

**(E)-1-(4-(tert-butyl)phenyl)-2,2,2-trifluoro-N-morpholinoethan-1-imine (3f)**

Yellow oil. <sup>1</sup>H NMR (400 MHz, CDCl<sub>3</sub>) δ 7.46 – 7.38 (m, 2H), 7.39 – 7.31 (m, 2H), 3.88 – 3.39 (m, 4H), 3.33 – 2.76 (m, 4H), 1.33 (s, 9H). <sup>13</sup>C NMR (100 MHz, CDCl<sub>3</sub>) δ 153.31, 136.99(q, <sup>2</sup>J<sub>C,F</sub> = 32.32Hz) 128.51, 128.24, 125.82, 120.06(q, <sup>1</sup>J<sub>C,F</sub> = 275.73Hz), 66.25, 54.36, 34.98, 31.32. <sup>19</sup>F NMR (376 MHz, CDCl<sub>3</sub>) δ -66.71. Spectroscopic data are in accordance with those described in the literature.<sup>[2]</sup>

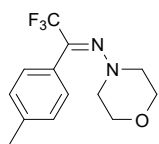

**(E)-2,2,2-trifluoro-N-morpholino-1-(p-tolyl)ethan-1-imine (3g)**

Yellow oil. <sup>1</sup>H NMR (400 MHz, CDCl<sub>3</sub>) δ 7.32 (d, *J* = 8.0 Hz, 2H), 7.22 (d, *J* = 8.0 Hz, 2H), 3.71 – 3.54 (m, 4H), 3.08 – 2.92 (m, 4H), 2.38 (s, 3H). <sup>13</sup>C NMR (100 MHz, CDCl<sub>3</sub>) δ 140.16, 136.93 (q, <sup>2</sup>J<sub>C,F</sub> = 33.33 Hz), 129.64, 128.64, 128.43, 121.40 (q, <sup>1</sup>J<sub>C,F</sub> = 275.73 Hz), 66.26, 54.33, 21.57. <sup>19</sup>F NMR (376 MHz, CDCl<sub>3</sub>) δ -66.81. Spectroscopic data are in accordance with those described in the literature.<sup>[4]</sup>

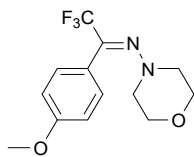

**(E)-2,2,2-trifluoro-1-(4-methoxyphenyl)-N-morpholinoethan-1-imine (3h)**

Yellow oil. <sup>1</sup>H NMR (400 MHz, CDCl<sub>3</sub>) δ 7.39 (d, *J* = 8.7 Hz, 2H), 6.98 – 6.84 (m, 2H), 3.84 (s, 3H), 3.71 – 3.51 (m, 4H), 3.21 – 2.77 (m, 4H). <sup>13</sup>C NMR (100 MHz, CDCl<sub>3</sub>) δ 160.69, 137.31(q, <sup>2</sup>J<sub>C,F</sub> = 33.33Hz), 129.98, 123.46, 121.39(q, <sup>1</sup>J<sub>C,F</sub> = 276.74 Hz), 114.38, 66.28, 55.41, 54.30. <sup>19</sup>F NMR (376 MHz, CDCl<sub>3</sub>) δ -66.81. Spectroscopic data are in accordance with those described in the literature. <sup>[1]</sup>

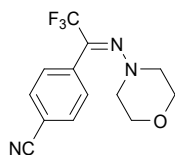

**(E)-4-(2,2,2-trifluoro-1-(morpholinoimino)ethyl)benzonitrile (3i)**

Yellow solid; m.p.= 149.4- 150.8 °C. <sup>1</sup>H NMR (400 MHz, CDCl<sub>3</sub>) δ 7.85 – 7.65 (m, 2H), 7.64 – 7.47 (m, 2H), 3.78 – 3.45 (m, 4H), 3.21 – 2.72 (m, 4H). <sup>13</sup>C NMR (100 MHz, CDCl<sub>3</sub>) δ 136.46, 133.09 (q, <sup>2</sup>J<sub>C,F</sub>= 33.33Hz), 132.69, 129.61, 121.09 (q, <sup>1</sup>J<sub>C,F</sub>= 275.73Hz), 117.96, 114.02, 66.07, 54.55. <sup>19</sup>F NMR (376 MHz, CDCl<sub>3</sub>) δ -66.22. HRMS (ESI) *m/z* [M+H]<sup>+</sup> Calculated for C<sub>13</sub>H<sub>12</sub>F<sub>3</sub>N<sub>3</sub>O (283.0934), found 283.1005.

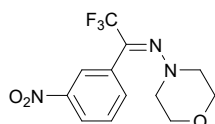

**(E)-1-(3-bromophenyl)-2,2,2-trifluoro-N-morpholinoethan-1-imine (3j)**

Yellow oil. <sup>1</sup>H NMR (400 MHz, CDCl<sub>3</sub>) δ 8.17 (dd, *J* = 8.1, 1.4 Hz, 1H), 7.73 (td, *J* = 7.5, 1.4 Hz, 1H), 7.65 (td, *J* = 7.8, 1.6 Hz, 1H), 7.49 (dd, *J* = 7.5, 1.6 Hz, 1H), 3.76 – 3.42 (m, 4H), 3.18 – 2.87 (m, 4H). <sup>13</sup>C NMR (100 MHz, CDCl<sub>3</sub>) δ 147.87, 134.04, 131.53(q, <sup>2</sup>J<sub>C,F</sub>= 33.3Hz), 131.38, 131.29, 127.28, 125.20, 120.89(q, <sup>1</sup>J<sub>C,F</sub>= 275.73Hz), 66.24, 53.86. <sup>19</sup>F NMR (376 MHz, CDCl<sub>3</sub>) δ -66.48. HRMS (ESI) *m/z* [M+H]<sup>+</sup> Calculated for C<sub>12</sub>H<sub>12</sub>F<sub>3</sub>N<sub>3</sub>O<sub>3</sub> (303.0836), found 303.0909.

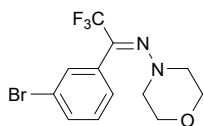

**(E)-1-(3-bromophenyl)-2,2,2-trifluoro-N-morpholinoethan-1-imine (3k)**

White solid; m.p.= 49.0- 50.2°C. <sup>1</sup>H NMR (400 MHz, CDCl<sub>3</sub>) δ 7.63 – 7.50 (m, 2H), 7.46 – 7.27 (m, 2H), 3.83 – 3.45 (m, 4H), 3.19 – 2.83 (m, 4H). <sup>13</sup>C NMR (100 MHz, CDCl<sub>3</sub>) δ 133.89 (q, <sup>2</sup>J<sub>C,F</sub>= 33.3Hz), 133.68, 133.13, 131.56, 130.49, 127.35, 121.21 (q, <sup>1</sup>J<sub>C,F</sub>= 275.73Hz), 123.05, 66.17, 54.45. <sup>19</sup>F NMR (376 MHz, CDCl<sub>3</sub>) δ -66.54. HRMS (ESI) *m/z* [M+H]<sup>+</sup> Calculated for C<sub>12</sub>H<sub>12</sub>BrF<sub>3</sub>N<sub>2</sub>O (336.0088), found 336.0061.

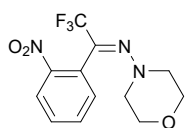

**(E)-2,2,2-trifluoro-N-morpholino-1-(2-nitrophenyl)ethan-1-imine**

**(3l)**

Yellow solid; m.p.= 99.6- 101.3°C. <sup>1</sup>H NMR (400 MHz, CDCl<sub>3</sub>) δ 7.69 (d, *J* = 8.1 Hz, 2H), 7.57 (d, *J* = 8.1 Hz, 2H), 3.83 – 3.48 (m, 4H), 3.16 – 2.79 (m, 4H). <sup>13</sup>C NMR (100 MHz, CDCl<sub>3</sub>) δ 147.94, 134.01, 131.58 (q, <sup>1</sup>J<sub>C,F</sub>= 35.35 Hz), 131.40, 131.28, 127.32, 125.20, 120.90 (q, <sup>1</sup>J<sub>C,F</sub>= 275.73 Hz), 66.25, 53.89. <sup>19</sup>F NMR (376 MHz, CDCl<sub>3</sub>) δ -66.48. HRMS (ESI) *m/z* [M+H]<sup>+</sup> Calculated for C<sub>12</sub>H<sub>12</sub>F<sub>3</sub>N<sub>3</sub>O<sub>3</sub> (303.0836), found 304.0860.

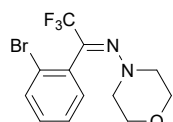

**(E)-1-(2-bromophenyl)-2,2,2-trifluoro-N-morpholinoethan-1-imine (3m)**

White solid; m.p.= 76.5- 77.2°C. <sup>1</sup>H NMR (400 MHz, CDCl<sub>3</sub>) δ 7.63 (dd, 1H), 7.42 – 7.27 (m, 3H), 3.79 – 3.48 (m, 4H), 3.22 – 2.95 (m, 4H). <sup>13</sup>C NMR (100 MHz, CDCl<sub>3</sub>) δ 134.09, 133.06, 131.32, 131.29, 129.20 (q, <sup>2</sup>J<sub>C,F</sub>= 35.35Hz), 127.57, 124.36, 121.50(q, <sup>1</sup>J<sub>C,F</sub>= 276.74Hz), 66.57, 53.66. <sup>19</sup>F NMR (376 MHz, CDCl<sub>3</sub>) δ -66.03. HRMS (ESI) *m/z* [M+H]<sup>+</sup> Calculated for C<sub>12</sub>H<sub>12</sub>BrF<sub>3</sub>N<sub>2</sub>O (336.0088), found 336.0108.

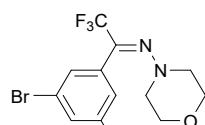

**(E)-1-(3,5-dibromophenyl)-2,2,2-trifluoro-N-morpholinoethan-1-imine (3n)**

White solid; m.p.= 143.0- 143.7°C. <sup>1</sup>H NMR (600 MHz, CDCl<sub>3</sub>) δ 7.73 (t, *J* = 1.8 Hz, 1H), 7.52 (d, *J* = 1.8 Hz, 2H), 3.73 – 3.61 (m, 4H), 3.11 – 2.99 (m, 4H). <sup>13</sup>C NMR (150 MHz, CDCl<sub>3</sub>) δ 135.68, 134.98, 131.46 (q, <sup>2</sup>J<sub>C,F</sub>= 34.73Hz), 130.35, 121.06 (q, <sup>1</sup>J<sub>C,F</sub>= 274.82Hz), 123.58, 66.09, 54.47. <sup>19</sup>F NMR (565 MHz, CDCl<sub>3</sub>) δ -66.27. HRMS (ESI) *m/z* [M+H]<sup>+</sup> Calculated for C<sub>12</sub>H<sub>11</sub>Br<sub>2</sub>F<sub>3</sub>N<sub>2</sub>O (414.9263), found 416.9268.

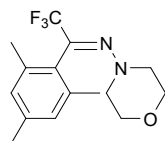

**(E)-2,2,2-trifluoro-1-mesityl-N-morpholinoethan-1-imine (3o)**

Yellow oil. <sup>1</sup>H NMR (400 MHz, CDCl<sub>3</sub>) δ 6.94 – 6.82 (m, 2H), 3.73 – 3.44 (m, 4H), 3.27 – 2.86 (m, 4H), 2.39 (s, 1H), 2.29 (s, 3H), 2.23 (s, 5H). <sup>13</sup>C NMR (100 MHz, CDCl<sub>3</sub>) δ 139.62, 137.36, 133.48 (q, <sup>2</sup>J<sub>C,F</sub>= 34.34 Hz), 129.69, 128.95, 128.64, 121.81(q, <sup>1</sup>J<sub>C,F</sub>= 274.82Hz), 66.76, 53.37, 21.26. <sup>19</sup>F NMR (376 MHz, CDCl<sub>3</sub>) δ -65.69. HRMS (ESI) *m/z* [M+H]<sup>+</sup> Calculated for C<sub>15</sub>H<sub>19</sub>F<sub>3</sub>N<sub>2</sub>O (301.1522), found 301.1524.

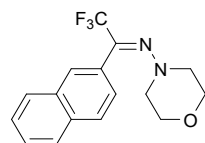

**(E)-2,2,2-trifluoro-N-morpholino-1-(naphthalen-2-yl)ethan-1-imine (3p)**

Yellow oil. <sup>1</sup>H NMR (400 MHz, CDCl<sub>3</sub>) δ 8.20 – 7.73 (m, 4H), 7.73 – 7.43 (m, 3H), 3.87 – 3.42 (m, 4H), 3.28 – 2.71 (m, 4H). <sup>13</sup>C NMR (100 MHz, CDCl<sub>3</sub>) δ 136.46 (q, <sup>2</sup>J<sub>C,F</sub>= 33.33Hz), 133.64, 133.00, 129.00, 128.72, 128.60, 128.37, 127.98, 127.63, 127.07, 125.35, 121.51(q, <sup>1</sup>J<sub>C,F</sub>= 275.73Hz), 66.24, 54.48. <sup>19</sup>F NMR (376 MHz, CDCl<sub>3</sub>) δ -66.39. HRMS (ESI) *m/z* [M+H]<sup>+</sup> Calculated for C<sub>16</sub>H<sub>15</sub>F<sub>3</sub>N<sub>2</sub>O (309.1209), found 308.1215.

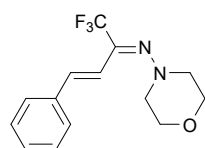

**(2E,3E)-1,1,1-trifluoro-N-morpholino-4-phenylbut-3-en-2-imine (3q)**



Yellow oil.  $^1\text{H}$  NMR (400 MHz,  $\text{CDCl}_3$ )  $\delta$  7.43 – 7.31 (m, 5H), 7.05 (d,  $J = 9.3$  Hz, 1H), 7.02 – 6.96 (m, 1H), 3.82 – 3.72 (m, 4H), 3.09 – 2.99 (m, 4H).  $^{13}\text{C}$  NMR (100 MHz,  $\text{CDCl}_3$ )  $\delta$  132.17, 131.78 (q,  $^3J_{\text{C,F}} = 5.05$  Hz), 131.52, 130.64 (q,  $^2J_{\text{C,F}} = 30.30$  Hz), 129.96, 128.94, 128.73, 123.95 (q,  $^1J_{\text{C,F}} = 272.7$  Hz), 66.23, 51.11.  $^{19}\text{F}$  NMR (376 MHz,  $\text{CDCl}_3$ )  $\delta$  -64.96. HRMS (ESI)  $m/z$   $[\text{M}+\text{H}]^+$  Calculated for  $\text{C}_{14}\text{H}_{15}\text{F}_3\text{N}_2\text{O}$  (285.1138), found 285.1140.

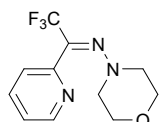

**(E)-2,2,2-trifluoro-N-morpholino-1-(pyridin-3-yl)ethan-1-imine (3r)**

Yellow oil.  $^1\text{H}$  NMR (400 MHz,  $\text{CDCl}_3$ )  $\delta$  8.71 (ddd,  $J = 4.9, 1.8, 1.0$  Hz, 1H), 7.76 (td,  $J = 7.8, 1.8$  Hz, 1H), 7.49 (d,  $J = 7.8$  Hz, 1H), 7.32 (ddd,  $J = 7.7, 4.9, 1.2$  Hz, 1H), 3.77 – 3.48 (m, 4H), 3.13 – 2.85 (m, 4H).  $^{13}\text{C}$  NMR (100 MHz,  $\text{CDCl}_3$ )  $\delta$  151.08, 150.14, 136.80, 132.74 (q,  $^2J_{\text{C,F}} = 33.33$  Hz), 124.84, 124.28, 121.51 (q,  $^1J_{\text{C,F}} = 275.73$  Hz), 66.16, 54.59.  $^{19}\text{F}$  NMR (376 MHz,  $\text{CDCl}_3$ )  $\delta$  -65.49. Spectroscopic data are in accordance with those described in the literature.<sup>[4]</sup>

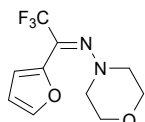

**(E)-2,2,2-trifluoro-1-(furan-2-yl)-N-morpholinoethan-1-imine (3s)**

White solid; m.p. = 97.3– 98.6 °C.  $^1\text{H}$  NMR (400 MHz,  $\text{CDCl}_3$ )  $\delta$  7.40 (s, 1H), 6.79 (d,  $J = 3.5$  Hz, 1H), 6.54 (d,  $J = 3.5$  Hz, 1H), 3.95 – 3.68 (m, 4H), 3.34 – 2.84 (m, 4H).  $^{13}\text{C}$  NMR (100 MHz,  $\text{CDCl}_3$ )  $\delta$  154.35, 141.08 (q,  $^2J_{\text{C,F}} = 42.42$  Hz), 124.56, 119.25 (q,  $^1J_{\text{C,F}} = 267.65$  Hz), 113.37 (q,  $^3J_{\text{C,F}} = 3.03$  Hz), 107.28, 66.35, 51.38.  $^{19}\text{F}$  NMR (376 MHz,  $\text{CDCl}_3$ )  $\delta$  -63.80. Spectroscopic data are in accordance with those described in the literature.<sup>[1]</sup>

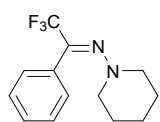

**(E)-2,2,2-trifluoro-1-phenyl-N-(piperidin-1-yl)ethan-1-imine (3t)**

Yellow oil.  $^1\text{H}$  NMR (400 MHz,  $\text{CDCl}_3$ )  $\delta$  7.59 – 7.29 (m, 5H), 3.18 – 2.80 (m, 4H), 1.60 – 1.38 (m, 6H).  $^{13}\text{C}$  NMR (100 MHz,  $\text{CDCl}_3$ )  $\delta$  132.63, 132.60 (q,  $^2J_{\text{C,F}} = 32.32$  Hz), 132.12, 129.47, 128.74, 128.73, 121.87 (q,  $^1J_{\text{C,F}} = 275.73$  Hz), 55.01, 25.04, 24.01.  $^{19}\text{F}$  NMR (376 MHz,  $\text{CDCl}_3$ )  $\delta$  -66.02. Spectroscopic data are in accordance with those described in the literature.<sup>[3]</sup>

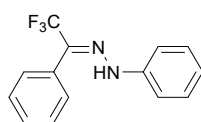

**(E)-1-phenyl-2-(2,2,2-trifluoro-1-phenylethylidene)hydrazine (3u)**

Brown oil.  $^1\text{H}$  NMR (400 MHz,  $\text{CDCl}_3$ )  $\delta$  7.80 (s, 1H), 7.62 – 7.54 (m, 3H), 7.45 – 7.41 (m, 2H), 7.31 – 7.26 (m, 2H), 7.10 – 7.03 (m, 2H), 7.00 – 6.89 (m, 1H).  $^{13}\text{C}$  NMR (100 MHz,  $\text{CDCl}_3$ )  $\delta$  143.06, 131.74 (q,  $^2J_{\text{C,F}} = 35.35$  Hz), 130.68, 129.99, 129.46, 129.12, 127.23, 122.03, 121.61 (q,  $^1J_{\text{C,F}} = 273.71$  Hz), 113.74.  $^{19}\text{F}$  NMR (376 MHz,  $\text{CDCl}_3$ )  $\delta$  -66.35. HRMS (ESI)  $m/z$   $[\text{M}+\text{H}]^+$  Calculated for  $\text{C}_{15}\text{H}_{12}\text{F}_3\text{N}_2$  (265.0947), found 265.0950.

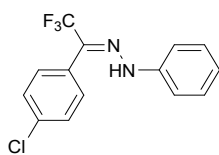

**(E)-1-(1-(4-chlorophenyl)-2,2,2-trifluoroethylidene)-2-phenylhydrazine**

**(3v)**

Brown oil. <sup>1</sup>H NMR (400 MHz, CDCl<sub>3</sub>) δ 7.77 (s, 1H), 7.64 – 7.50 (m, 3H), 7.41 (dd, *J* = 7.5, 2.0 Hz, 2H), 7.25 – 7.17 (m, 2H), 7.04 – 6.95 (m, 2H). <sup>13</sup>C NMR (100 MHz, CDCl<sub>3</sub>) δ 141.70, 132.49 (q, <sup>2</sup>*J*<sub>C,F</sub> = 35.35 Hz), 130.85, 130.06, 129.41, 129.03, 126.98, 126.82, 121.45 (q, <sup>1</sup>*J*<sub>C,F</sub> = 273.71Hz), 114.92. <sup>19</sup>F NMR (376 MHz, CDCl<sub>3</sub>) δ -66.54. HRMS (ESI) *m/z* [M+H]<sup>+</sup> Calculated for C<sub>14</sub>H<sub>10</sub>ClF<sub>3</sub>N<sub>2</sub> (299.0557), found 299.0560.

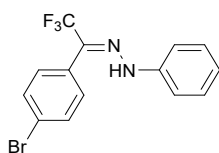

**(E)-1-(1-(4-bromophenyl)-2,2,2-trifluoroethylidene)-2-phenylhydrazine**

**(3w)**

Brown oil. <sup>1</sup>H NMR (400 MHz, CDCl<sub>3</sub>) δ 7.77 (s, 1H), 7.63 – 7.52 (m, 3H), 7.47 – 7.32 (m, 4H), 6.99 – 6.91 (m, 2H). <sup>13</sup>C NMR (100 MHz, CDCl<sub>3</sub>) δ 142.19, 132.65 (q, <sup>2</sup>*J*<sub>C,F</sub> = 35.35 Hz), 132.31, 130.86, 130.06, 129.02, 126.97, 121.45 (q, <sup>1</sup>*J*<sub>C,F</sub> = 273.71Hz), 115.36, 114.15. <sup>19</sup>F NMR (376 MHz, CDCl<sub>3</sub>) δ -66.55. HRMS (ESI) *m/z* [M+H]<sup>+</sup> Calculated for C<sub>14</sub>H<sub>10</sub>BrF<sub>3</sub>N<sub>2</sub> (343.0052), found 292.0059.

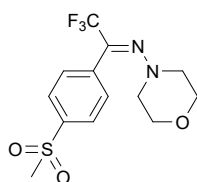

**(E)-2,2,2-trifluoro-1-(4-(methylsulfonyl)phenyl)-N-morpholinoethan-1-**

**imine**

Yellow solid; m.p. = 133.6–135.0 °C. <sup>1</sup>H NMR (400 MHz, CDCl<sub>3</sub>) δ 8.23 – 7.79 (m, 2H), 7.74 – 7.49 (m, 2H), 3.69 – 3.54 (m, 4H), 3.09 (s, 3H), 3.03 – 2.95 (m, 4H). <sup>13</sup>C NMR (100 MHz, CDCl<sub>3</sub>) δ 141.92, 137.49, 132.51 (q, <sup>2</sup>*J*<sub>C,F</sub> = 33.33Hz), 129.91, 128.01, 121.16 (q, <sup>1</sup>*J*<sub>C,F</sub> = 275.73Hz), 66.05, 54.53, 44.44. <sup>19</sup>F NMR (376 MHz, CDCl<sub>3</sub>) δ -66.15. HRMS (ESI) *m/z* [M+H]<sup>+</sup> Calculated for C<sub>13</sub>H<sub>15</sub>F<sub>3</sub>N<sub>2</sub>O<sub>3</sub>S (337.0828), found 337.0835.

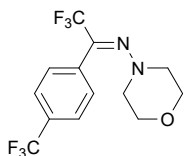

**(E)-2,2,2-trifluoro-N-morpholino-1-(4(trifluoromethyl)phenyl)ethan-1-imine**

White solid; m.p. = 92.6–93.6 °C. <sup>1</sup>H NMR (400 MHz, CDCl<sub>3</sub>) δ 7.69 (d, *J* = 8.0 Hz, 2H), 7.57 (d, *J* = 8.1 Hz, 2H), 3.73 – 3.46 (m, 4H), 3.14 – 2.72 (m, 4H). <sup>13</sup>C NMR (100 MHz, CDCl<sub>3</sub>) δ 135.55, 133.96 (q, <sup>2</sup>*J*<sub>C,F</sub> = 33.33Hz), 132.05 (q, <sup>2</sup>*J*<sub>C,F</sub> = 32.32Hz), 129.28, 123.73 (q, <sup>1</sup>*J*<sub>C,F</sub> = 273.71Hz), 121.22 (q, <sup>1</sup>*J*<sub>C,F</sub> = 275.73Hz), 125.98 (q, <sup>3</sup>*J*<sub>C,F</sub> = 3.535Hz), 66.13, 54.50. <sup>19</sup>F NMR (376 MHz, CDCl<sub>3</sub>) δ -63.05, -66.47. Spectroscopic data are in accordance with those described in the literature.<sup>[4]</sup>

## X. Crystal Data and Structure Refinement for 3n

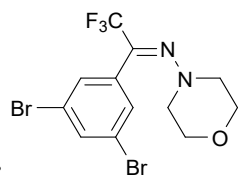

**Compound 3n:**

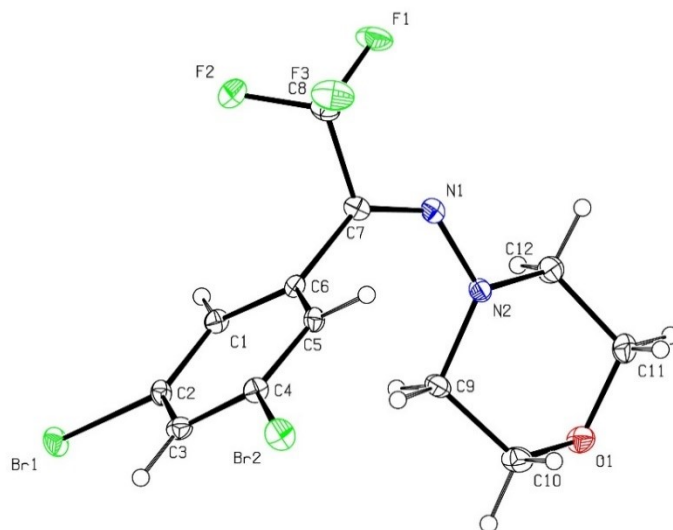

**CCDC number: 2178804**

**Table 1 Crystal data and structure refinement for 3n.**

|                                      |                                                                                 |
|--------------------------------------|---------------------------------------------------------------------------------|
| Identification code                  | 3n                                                                              |
| Empirical formula                    | C <sub>12</sub> H <sub>11</sub> Br <sub>2</sub> F <sub>3</sub> N <sub>2</sub> O |
| Formula weight                       | 416.05                                                                          |
| Temperature/K                        | 169.0                                                                           |
| Crystal system                       | monoclinic                                                                      |
| Space group                          | P2 <sub>1</sub> /c                                                              |
| a/Å                                  | 11.9638(4)                                                                      |
| b/Å                                  | 7.6176(2)                                                                       |
| c/Å                                  | 16.0976(6)                                                                      |
| α/°                                  | 90                                                                              |
| β/°                                  | 111.5740(10)                                                                    |
| γ/°                                  | 90                                                                              |
| Volume/Å <sup>3</sup>                | 1364.28(8)                                                                      |
| Z                                    | 4                                                                               |
| ρ <sub>calc</sub> /g/cm <sup>3</sup> | 2.026                                                                           |
| μ/mm <sup>-1</sup>                   | 5.973                                                                           |
| F(000)                               | 808.0                                                                           |

|                                                  |                                                                      |
|--------------------------------------------------|----------------------------------------------------------------------|
| Crystal size/mm <sup>3</sup>                     | 0.49 × 0.32 × 0.18                                                   |
| Radiation                                        | MoK $\alpha$ ( $\lambda$ = 0.71073)                                  |
| 2 $\theta$ range for data collection/ $^{\circ}$ | 5.326 to 54.322                                                      |
| Index ranges                                     | -15 $\leq$ h $\leq$ 15, -9 $\leq$ k $\leq$ 8, -20 $\leq$ l $\leq$ 20 |
| Reflections collected                            | 9355                                                                 |
| Independent reflections                          | 3005 [R <sub>int</sub> = 0.0580, R <sub>sigma</sub> = 0.0644]        |
| Data/restraints/parameters                       | 3005/0/181                                                           |
| Goodness-of-fit on F <sup>2</sup>                | 1.050                                                                |
| Final R indexes [I $\geq$ 2 $\sigma$ (I)]        | R <sub>1</sub> = 0.0494, wR <sub>2</sub> = 0.1232                    |
| Final R indexes [all data]                       | R <sub>1</sub> = 0.0567, wR <sub>2</sub> = 0.1276                    |
| Largest diff. peak/hole / e $\text{\AA}^{-3}$    | 1.15/-1.99                                                           |

**Table 2 Fractional Atomic Coordinates ( $\times 10^4$ ) and Equivalent Isotropic Displacement Parameters ( $\text{\AA}^2 \times 10^3$ ) for 3n.  $U_{\text{eq}}$  is defined as 1/3 of the trace of the orthogonalised  $U_{ij}$  tensor.**

| Atom | x          | y          | z           | U(eq)      |
|------|------------|------------|-------------|------------|
| Br1  | 2940.1 (4) | 9498.4 (5) | 810.4 (3)   | 24.80 (16) |
| Br2  | 6175.9 (4) | 9705.7 (5) | 4396.4 (3)  | 27.41 (16) |
| F1   | 2329 (2)   | 2187 (3)   | 3418.0 (19) | 35.6 (6)   |
| F2   | 3063 (2)   | 3195 (3)   | 2484.1 (18) | 34.2 (6)   |
| F3   | 4087 (2)   | 3348 (3)   | 3884.9 (19) | 37.4 (6)   |
| O1   | -564 (2)   | 9381 (3)   | 3875 (2)    | 24.9 (6)   |
| N1   | 1565 (3)   | 5300 (4)   | 3573 (2)    | 17.6 (6)   |
| N2   | 1013 (3)   | 6730 (4)   | 3731 (2)    | 18.2 (6)   |
| C1   | 2782 (3)   | 7338 (4)   | 2195 (2)    | 17.8 (7)   |
| C2   | 3427 (3)   | 8679 (5)   | 2000 (2)    | 17.6 (7)   |
| C3   | 4429 (3)   | 9416 (5)   | 2646 (3)    | 20.5 (8)   |
| C4   | 4781 (3)   | 8773 (5)   | 3509 (3)    | 18.5 (7)   |
| C5   | 4147 (3)   | 7454 (5)   | 3736 (2)    | 17.1 (7)   |
| C6   | 3136 (3)   | 6753 (4)   | 3076 (2)    | 15.7 (7)   |
| C7   | 2454 (3)   | 5296 (4)   | 3314 (3)    | 18.4 (8)   |
| C8   | 2967 (3)   | 3500 (5)   | 3277 (3)    | 23.8 (8)   |
| C9   | 1001 (3)   | 8466 (5)   | 3338 (3)    | 23.0 (8)   |
| C10  | 571 (4)    | 9812 (5)   | 3847 (3)    | 27.2 (9)   |
| C11  | -486 (4)   | 7734 (5)   | 4313 (3)    | 27.0 (9)   |
| C12  | -132 (3)   | 6293 (5)   | 3819 (3)    | 25.0 (8)   |

**Table 3 Anisotropic Displacement Parameters ( $\text{\AA}^2 \times 10^3$ ) for 3n. The Anisotropic**

displacement factor exponent takes the form:  $-2\pi^2[h^2a^*2U_{11}+2hka^*b^*U_{12}+\dots]$ .

| Atom | $U_{11}$  | $U_{22}$  | $U_{33}$  | $U_{23}$   | $U_{13}$  | $U_{12}$    |
|------|-----------|-----------|-----------|------------|-----------|-------------|
| Br1  | 27.4 (2)  | 29.6 (2)  | 15.5 (3)  | 6.96 (14)  | 5.65 (19) | 5.27 (14)   |
| Br2  | 22.8 (2)  | 32.5 (2)  | 20.8 (3)  | -3.96 (15) | 0.83 (19) | -10.77 (15) |
| F1   | 33.5 (13) | 18.2 (10) | 61.1 (19) | 4.3 (11)   | 24.5 (13) | -3.8 (9)    |
| F2   | 44.4 (14) | 28.5 (12) | 36.5 (16) | -1.9 (11)  | 23.0 (13) | 7.5 (11)    |
| F3   | 23.3 (12) | 30.6 (12) | 45.3 (17) | 9.1 (12)   | -2.8 (12) | 6.8 (10)    |
| O1   | 20.6 (14) | 23.4 (13) | 33.2 (18) | -0.9 (12)  | 12.7 (13) | 1.1 (10)    |
| N1   | 16.8 (15) | 20.6 (14) | 11.1 (17) | 0.6 (11)   | 0.1 (13)  | -1.9 (11)   |
| N2   | 18.6 (15) | 18.6 (13) | 18.6 (17) | 2.1 (12)   | 8.2 (13)  | 0.1 (11)    |
| C1   | 17.8 (17) | 19.1 (15) | 12.5 (18) | -1.3 (14)  | 0.9 (15)  | 0.7 (13)    |
| C2   | 16.1 (16) | 22.7 (16) | 13.9 (19) | 2.8 (14)   | 5.4 (15)  | 3.9 (13)    |
| C3   | 18.7 (18) | 16.9 (16) | 27 (2)    | -2.0 (14)  | 10.0 (18) | -1.0 (13)   |
| C4   | 15.7 (16) | 21.1 (16) | 14.6 (19) | -1.8 (14)  | 0.7 (15)  | -0.8 (13)   |
| C5   | 17.0 (16) | 20.6 (16) | 13.1 (18) | 0.2 (14)   | 5.0 (15)  | 0.7 (13)    |
| C6   | 15.2 (16) | 16.7 (15) | 16.0 (19) | -3.0 (13)  | 6.6 (15)  | -0.5 (13)   |
| C7   | 14.3 (17) | 18.8 (16) | 17 (2)    | 1.0 (14)   | 0.5 (15)  | -2.6 (12)   |
| C8   | 19.6 (18) | 20.5 (17) | 31 (2)    | 2.3 (16)   | 8.9 (17)  | -2.7 (14)   |
| C9   | 25.2 (19) | 17.9 (16) | 29 (2)    | 5.7 (15)   | 14.0 (18) | 1.5 (14)    |
| C10  | 21.8 (19) | 21.2 (17) | 42 (3)    | 0.5 (17)   | 15 (2)    | -2.3 (15)   |
| C11  | 29 (2)    | 28.9 (19) | 30 (2)    | -1.5 (17)  | 18.4 (19) | -2.0 (16)   |
| C12  | 24.0 (19) | 23.7 (18) | 31 (2)    | -2.4 (16)  | 14.3 (18) | -3.8 (15)   |

**Table 4 Bond Lengths for 3n.**

| Atom | Atom | Length/Å  | Atom | Atom | Length/Å  |
|------|------|-----------|------|------|-----------|
| Br1  | C2   | 1.891 (4) | C1   | C2   | 1.385 (5) |
| Br2  | C4   | 1.892 (4) | C1   | C6   | 1.395 (5) |
| F1   | C8   | 1.327 (4) | C2   | C3   | 1.385 (5) |
| F2   | C8   | 1.342 (5) | C3   | C4   | 1.383 (5) |
| F3   | C8   | 1.343 (5) | C4   | C5   | 1.386 (5) |
| O1   | C10  | 1.414 (4) | C5   | C6   | 1.391 (5) |
| O1   | C11  | 1.425 (5) | C6   | C7   | 1.508 (5) |
| N1   | N2   | 1.346 (4) | C7   | C8   | 1.510 (5) |
| N1   | C7   | 1.278 (5) | C9   | C10  | 1.515 (5) |
| N2   | C9   | 1.464 (4) | C11  | C12  | 1.505 (5) |
| N2   | C12  | 1.465 (4) |      |      |           |

**Table 5 Bond Angles for 3n.**

| Atom | Atom | Atom | Angle/°   | Atom | Atom | Atom | Angle/°   |
|------|------|------|-----------|------|------|------|-----------|
| C10  | O1   | C11  | 109.3 (3) | C5   | C6   | C1   | 120.5 (3) |
| C7   | N1   | N2   | 126.1 (3) | C5   | C6   | C7   | 119.2 (3) |
| N1   | N2   | C9   | 125.2 (3) | N1   | C7   | C6   | 132.4 (3) |
| N1   | N2   | C12  | 112.1 (3) | N1   | C7   | C8   | 114.5 (3) |
| C9   | N2   | C12  | 112.7 (3) | C6   | C7   | C8   | 113.1 (3) |
| C2   | C1   | C6   | 118.7 (3) | F1   | C8   | F2   | 106.7 (3) |
| C1   | C2   | Br1  | 118.9 (3) | F1   | C8   | F3   | 107.0 (3) |
| C1   | C2   | C3   | 122.0 (3) | F1   | C8   | C7   | 114.1 (3) |
| C3   | C2   | Br1  | 119.1 (3) | F2   | C8   | F3   | 105.5 (3) |
| C4   | C3   | C2   | 118.1 (3) | F2   | C8   | C7   | 111.8 (3) |
| C3   | C4   | Br2  | 118.9 (3) | F3   | C8   | C7   | 111.1 (3) |
| C3   | C4   | C5   | 121.8 (3) | N2   | C9   | C10  | 109.2 (3) |
| C5   | C4   | Br2  | 119.3 (3) | O1   | C10  | C9   | 112.4 (3) |
| C4   | C5   | C6   | 118.9 (3) | O1   | C11  | C12  | 111.1 (3) |
| C1   | C6   | C7   | 120.2 (3) | N2   | C12  | C11  | 109.9 (3) |

**Table 6 Torsion Angles for 3n.**

| A   | B   | C   | D   | Angle/°    | A   | B  | C   | D   | Angle/°    |
|-----|-----|-----|-----|------------|-----|----|-----|-----|------------|
| Br1 | C2  | C3  | C4  | -178.8 (3) | C2  | C3 | C4  | C5  | -1.3 (5)   |
| Br2 | C4  | C5  | C6  | -178.8 (3) | C3  | C4 | C5  | C6  | 0.6 (5)    |
| O1  | C11 | C12 | N2  | 57.1 (5)   | C4  | C5 | C6  | C1  | 1.5 (5)    |
| N1  | N2  | C9  | C10 | -165.8 (4) | C4  | C5 | C6  | C7  | 178.9 (3)  |
| N1  | N2  | C12 | C11 | 159.4 (3)  | C5  | C6 | C7  | N1  | 91.3 (5)   |
| N1  | C7  | C8  | F1  | 7.5 (5)    | C5  | C6 | C7  | C8  | -85.4 (4)  |
| N1  | C7  | C8  | F2  | 128.8 (4)  | C6  | C1 | C2  | Br1 | -179.2 (2) |
| N1  | C7  | C8  | F3  | -113.6 (4) | C6  | C1 | C2  | C3  | 1.9 (5)    |
| N2  | N1  | C7  | C6  | -2.3 (7)   | C6  | C7 | C8  | F1  | -175.2 (3) |
| N2  | N1  | C7  | C8  | 174.3 (3)  | C6  | C7 | C8  | F2  | -53.9 (4)  |
| N2  | C9  | C10 | O1  | -55.7 (5)  | C6  | C7 | C8  | F3  | 63.7 (4)   |
| C1  | C2  | C3  | C4  | 0.0 (5)    | C7  | N1 | N2  | C9  | 24.2 (6)   |
| C1  | C6  | C7  | N1  | -91.3 (5)  | C7  | N1 | N2  | C12 | 166.9 (4)  |
| C1  | C6  | C7  | C8  | 92.1 (4)   | C9  | N2 | C12 | C11 | -53.0 (4)  |
| C2  | C1  | C6  | C5  | -2.7 (5)   | C10 | O1 | C11 | C12 | -60.9 (4)  |
| C2  | C1  | C6  | C7  | 179.9 (3)  | C11 | O1 | C10 | C9  | 60.6 (5)   |
| C2  | C3  | C4  | Br2 | 178.0 (3)  | C12 | N2 | C9  | C10 | 51.6 (4)   |

**Table 7 Hydrogen Atom Coordinates ( $\text{\AA} \times 10^4$ ) and Isotropic Displacement Parameters ( $\text{\AA}^2 \times 10^3$ ) for 3n.**

| Atom | x        | y        | z       | U(eq) |
|------|----------|----------|---------|-------|
| H1   | 2111.25  | 6825.53  | 1738.3  | 21    |
| H3   | 4861.99  | 10336.67 | 2502.05 | 25    |
| H5   | 4399.39  | 7037.27  | 4333.14 | 20    |
| H9A  | 459.04   | 8457.17  | 2702.26 | 28    |
| H9B  | 1819.71  | 8772.32  | 3369.1  | 28    |
| H10A | 1165.67  | 9900.2   | 4464.61 | 33    |
| H10B | 519.91   | 10973.63 | 3559.37 | 33    |
| H11A | -1273.61 | 7449.74  | 4350.75 | 32    |
| H11B | 114.98   | 7814.92  | 4928.97 | 32    |
| H12A | -51.28   | 5173.22  | 4148.31 | 30    |
| H12B | -763.24  | 6143.62  | 3219.27 | 30    |

**Copies of NMR spectra:  $^1\text{H}$ -,  $^{13}\text{C}$ - and  $^{19}\text{F}$ -NMR spectra**

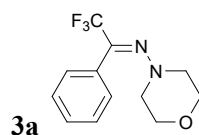

**$^1\text{H}$  NMR**

SY22022802  
1H

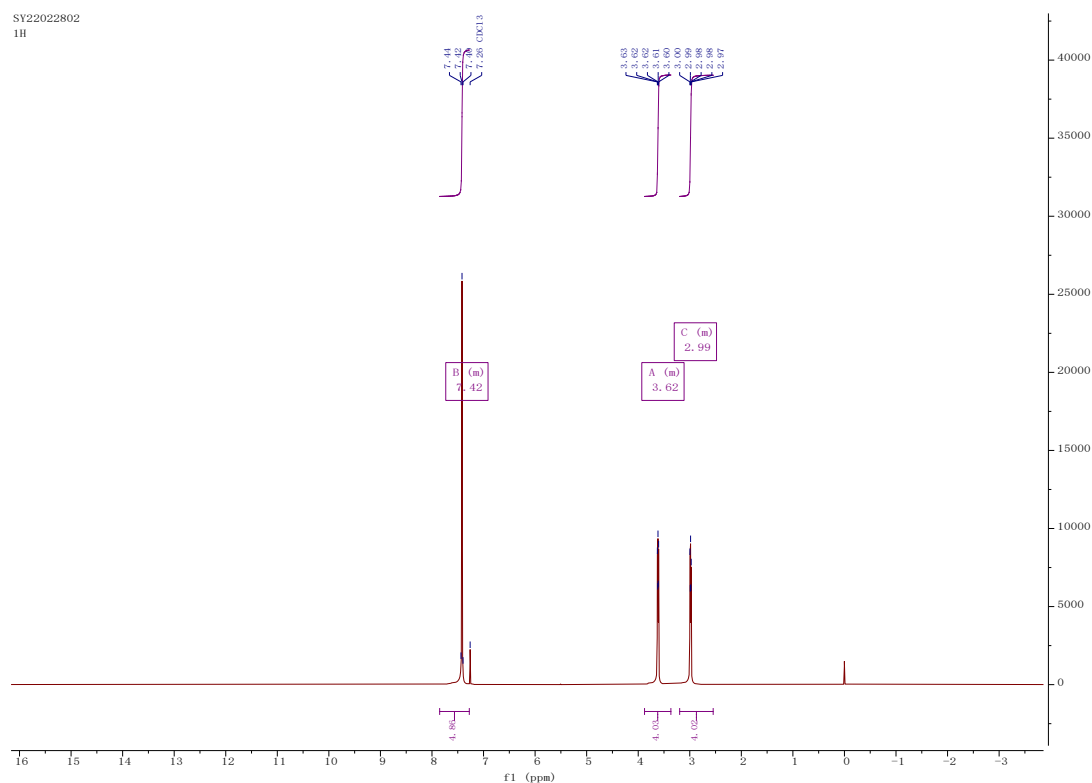

**$^{13}\text{C}$  NMR**

SY22022802  
13C

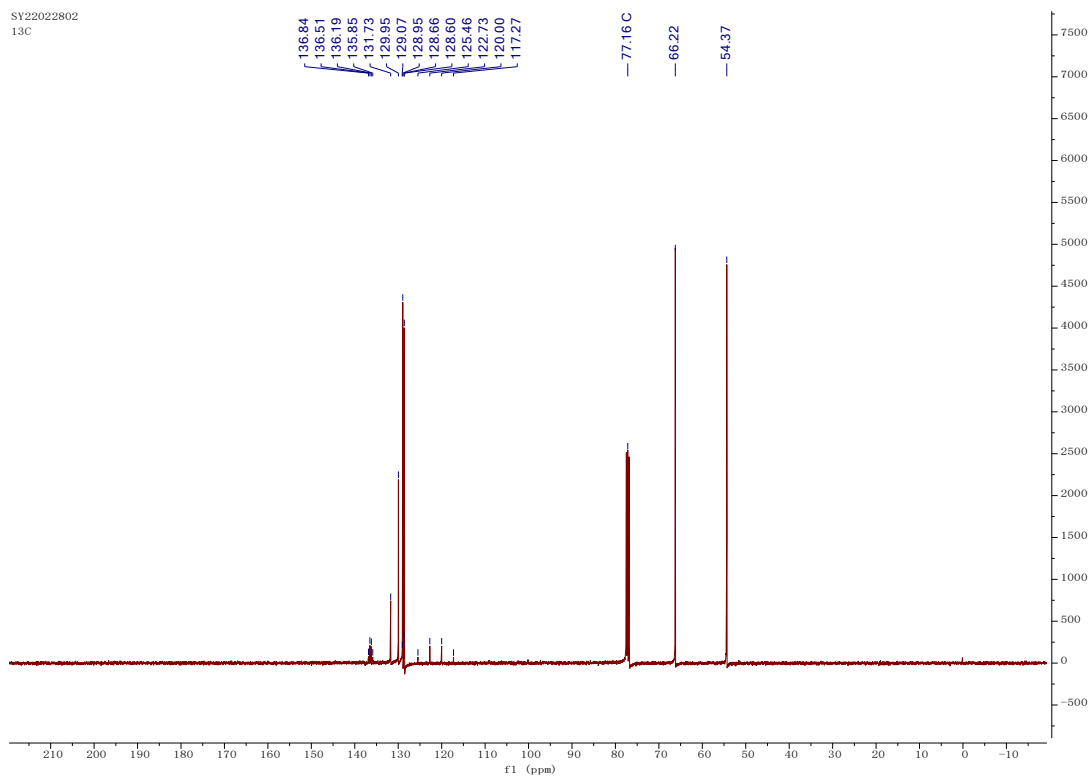

## <sup>19</sup>F NMR

SY22022802  
19F

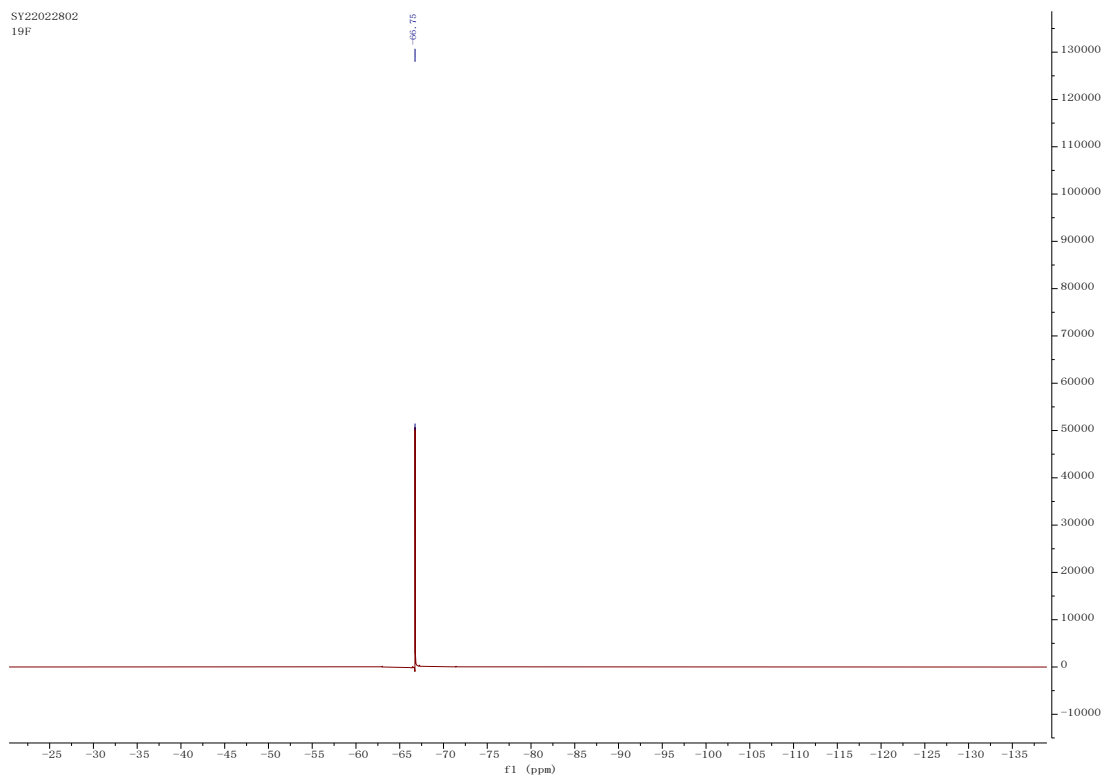



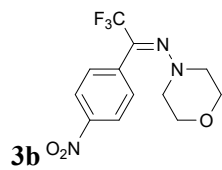

**<sup>1</sup>H NMR**

SV220610.1.fid

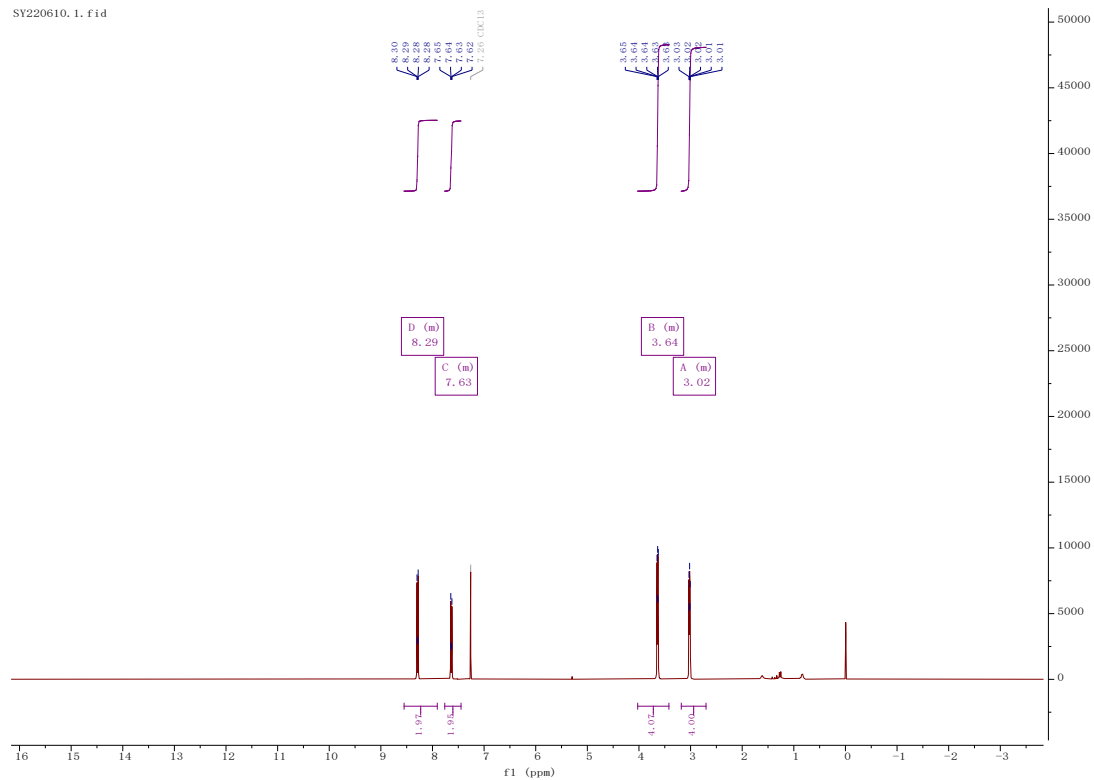

**<sup>13</sup>C NMR**

硝基<sup>w</sup>

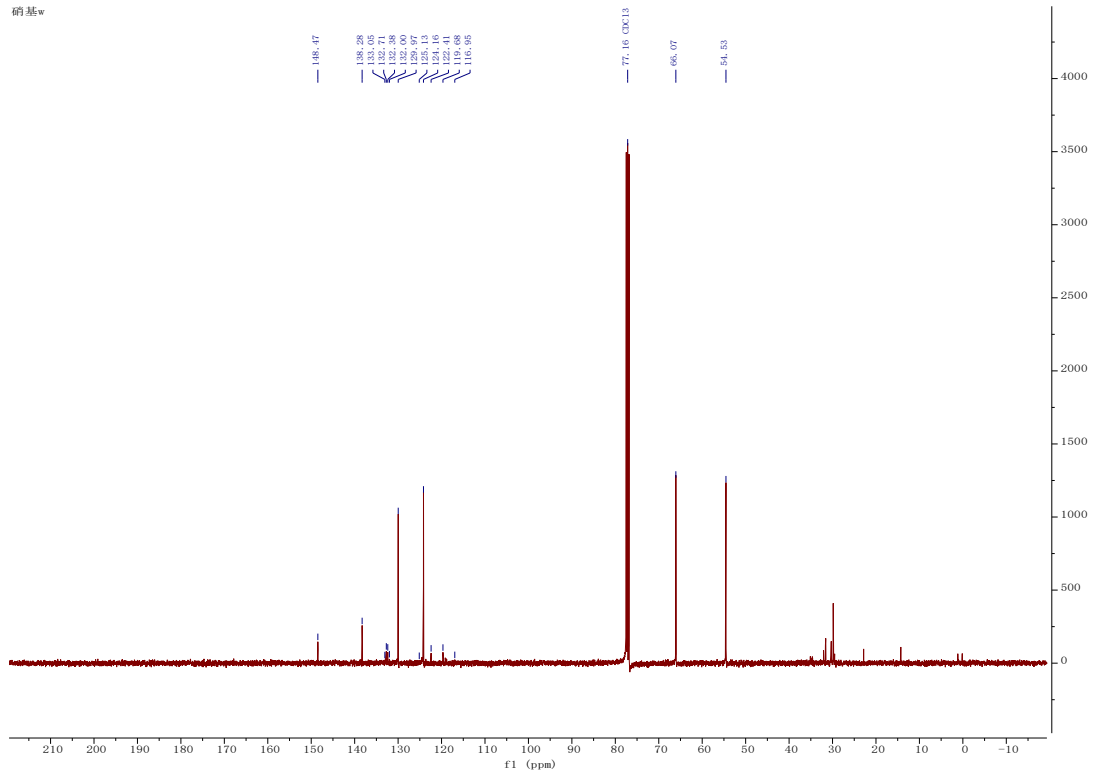

## <sup>19</sup>F NMR

SY210621  
19F

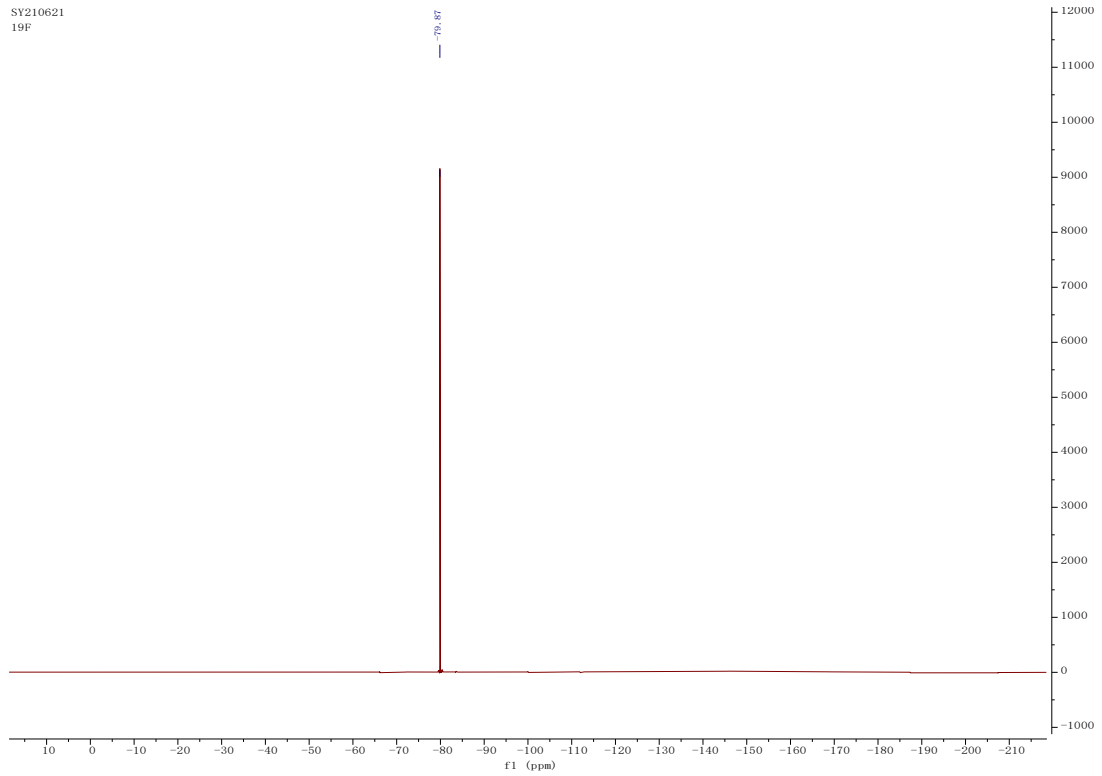



# <sup>19</sup>F NMR

sy22031501.4.fid

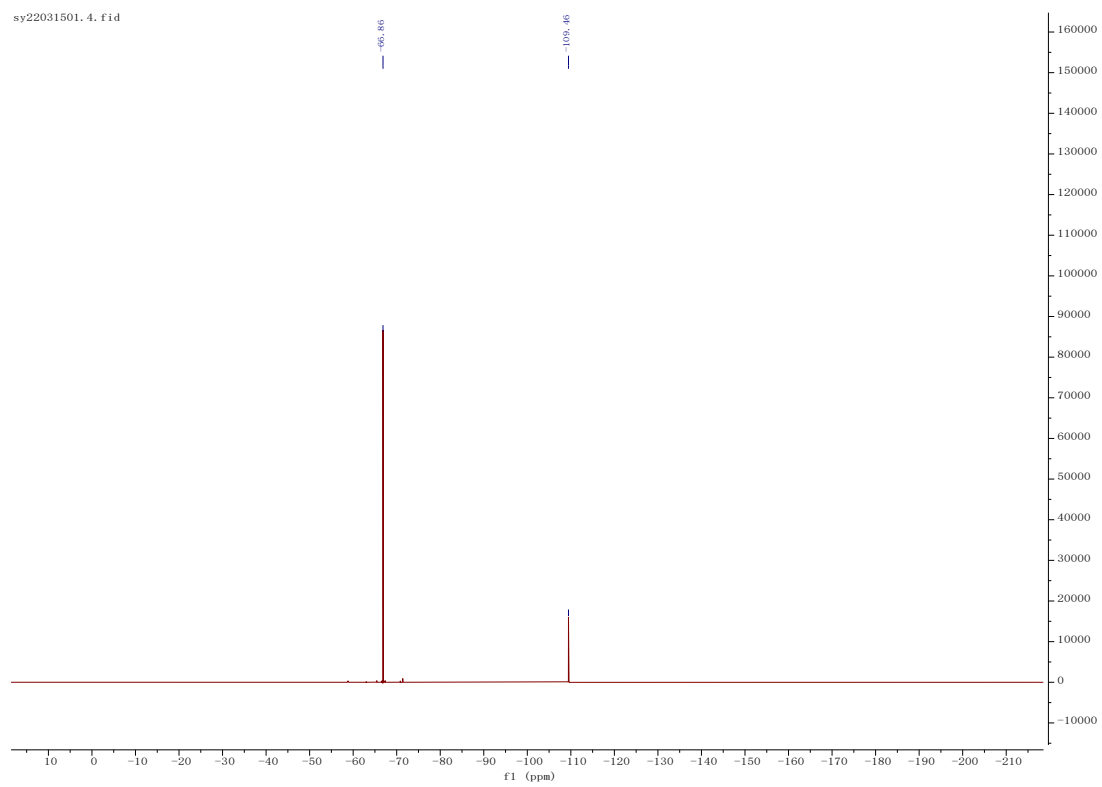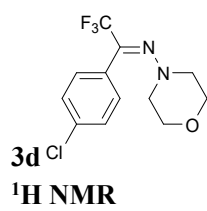

SY22022801  
1H

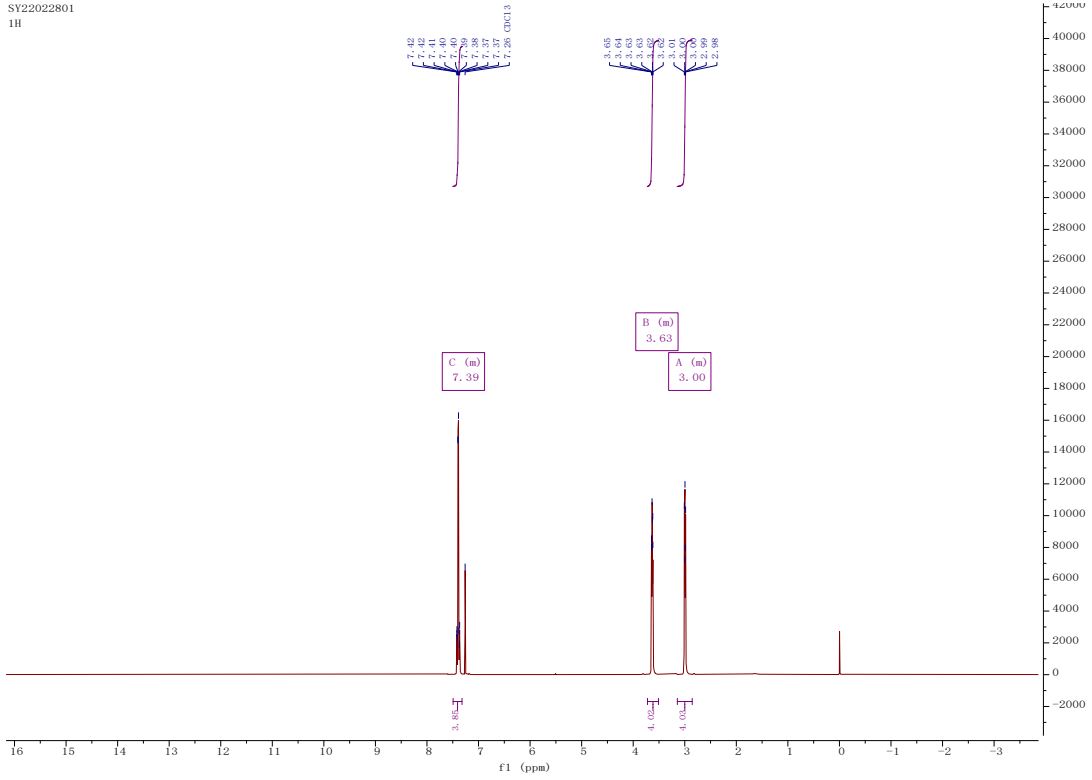

### **13C NMR**

SY22022801  
13C

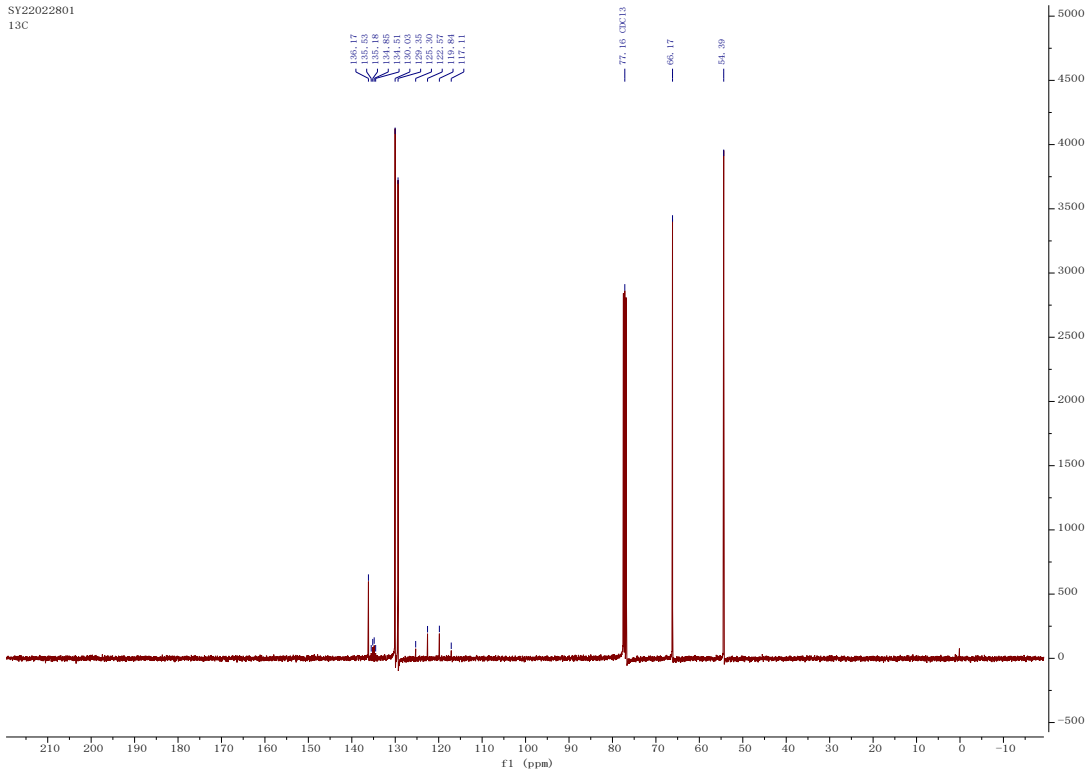

### **19F NMR**

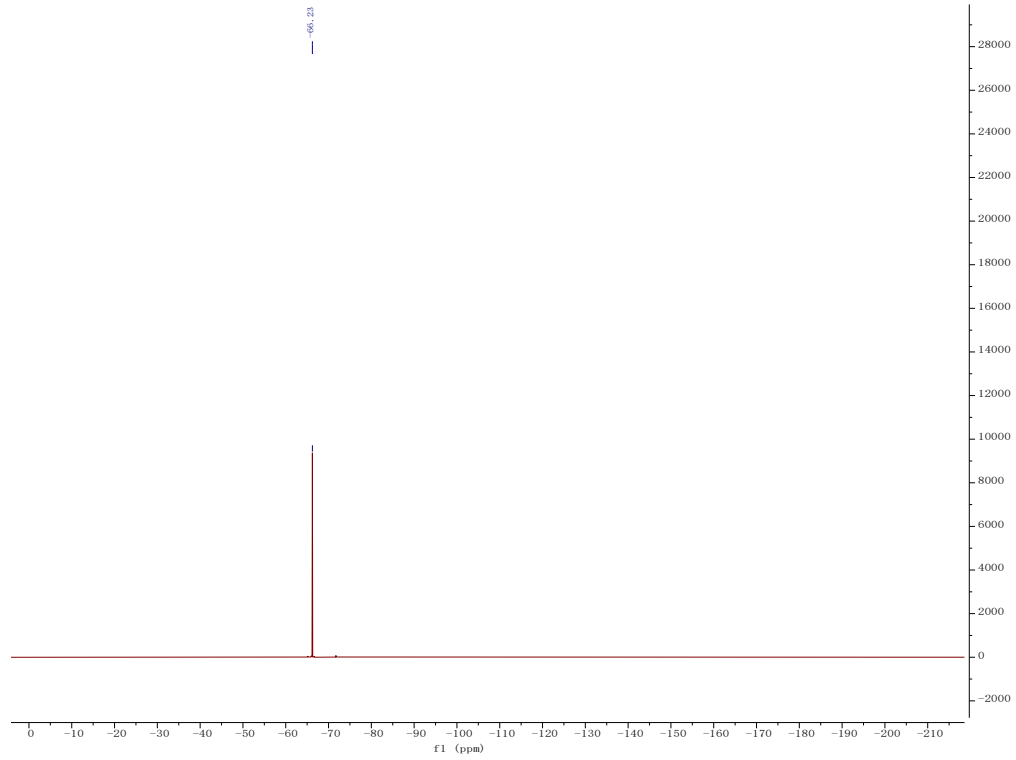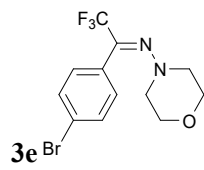

**<sup>1</sup>H NMR**

SY22050401.5.fid

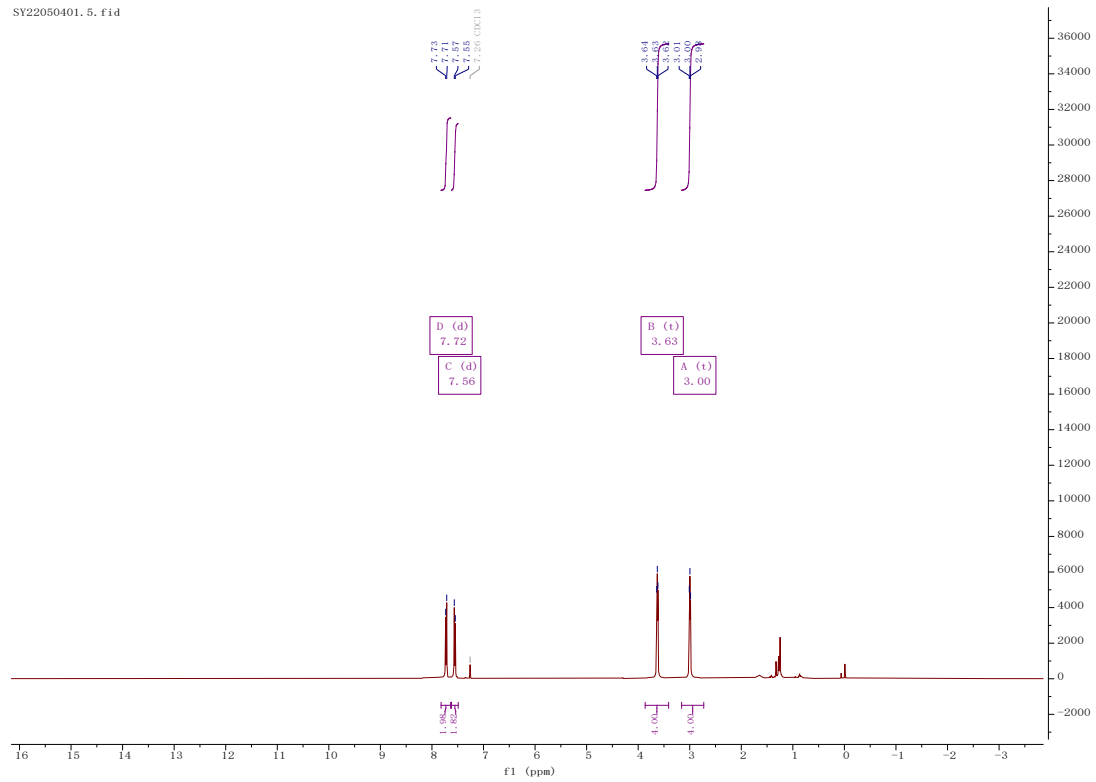

**<sup>13</sup>C NMR**

SY22050402 4-Br. 1. fid

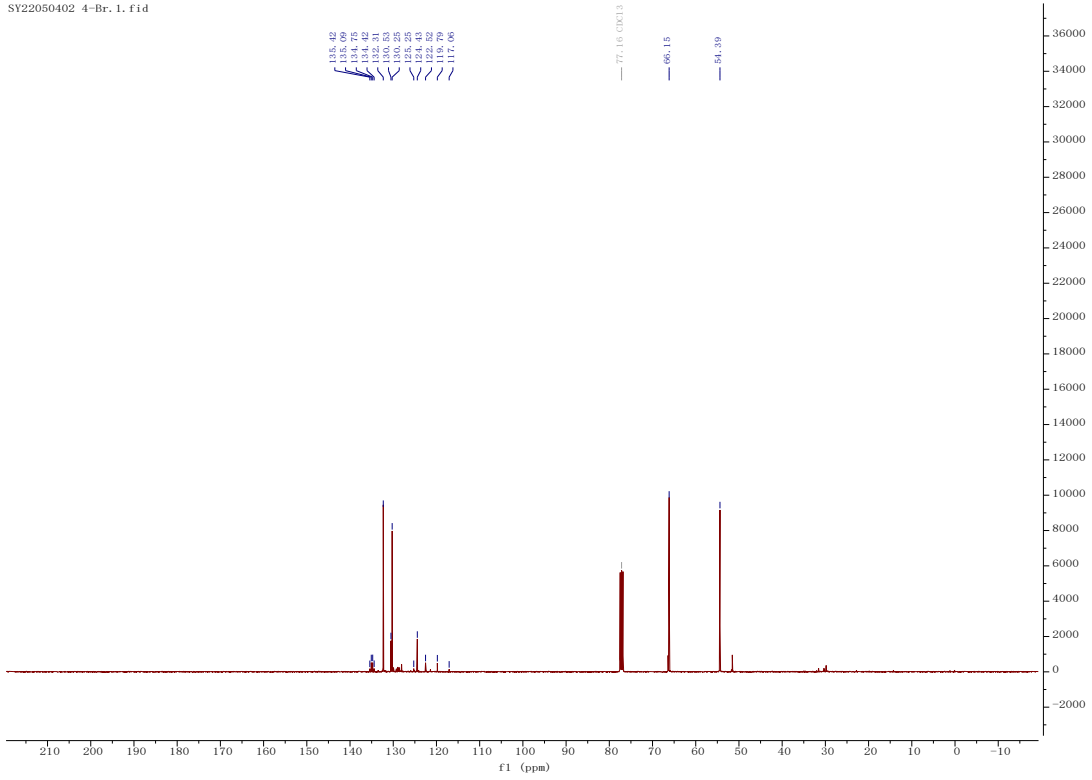

### <sup>19</sup>F NMR

SY22050402 4-Br. 2. fid

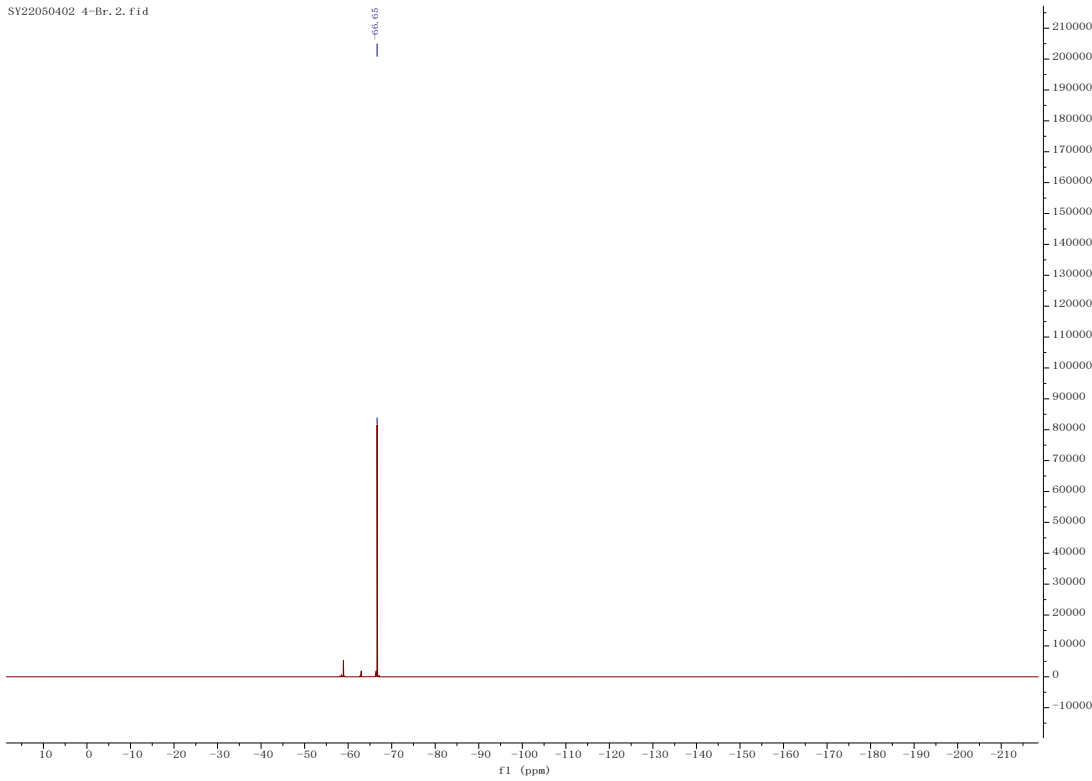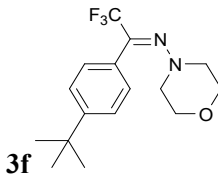

# <sup>1</sup>H NMR

SY22042102.1.fid  
1H

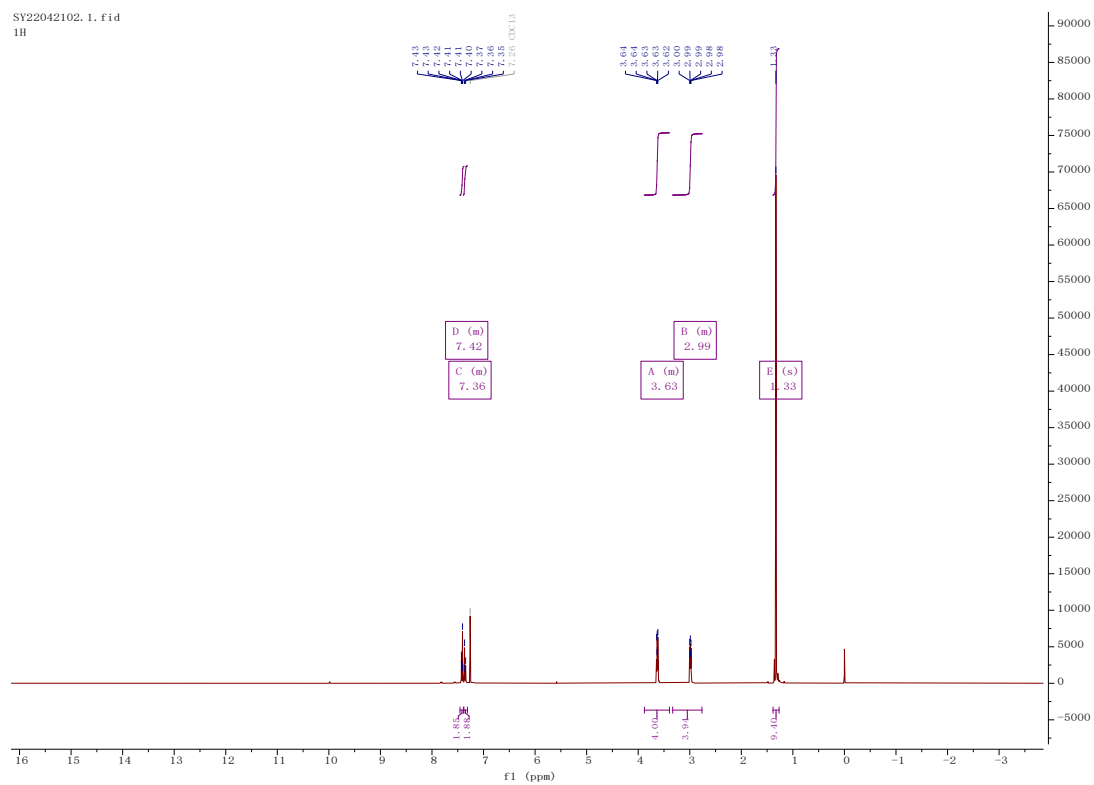

# <sup>13</sup>C NMR

SY22042102.4-tbu.2.fid

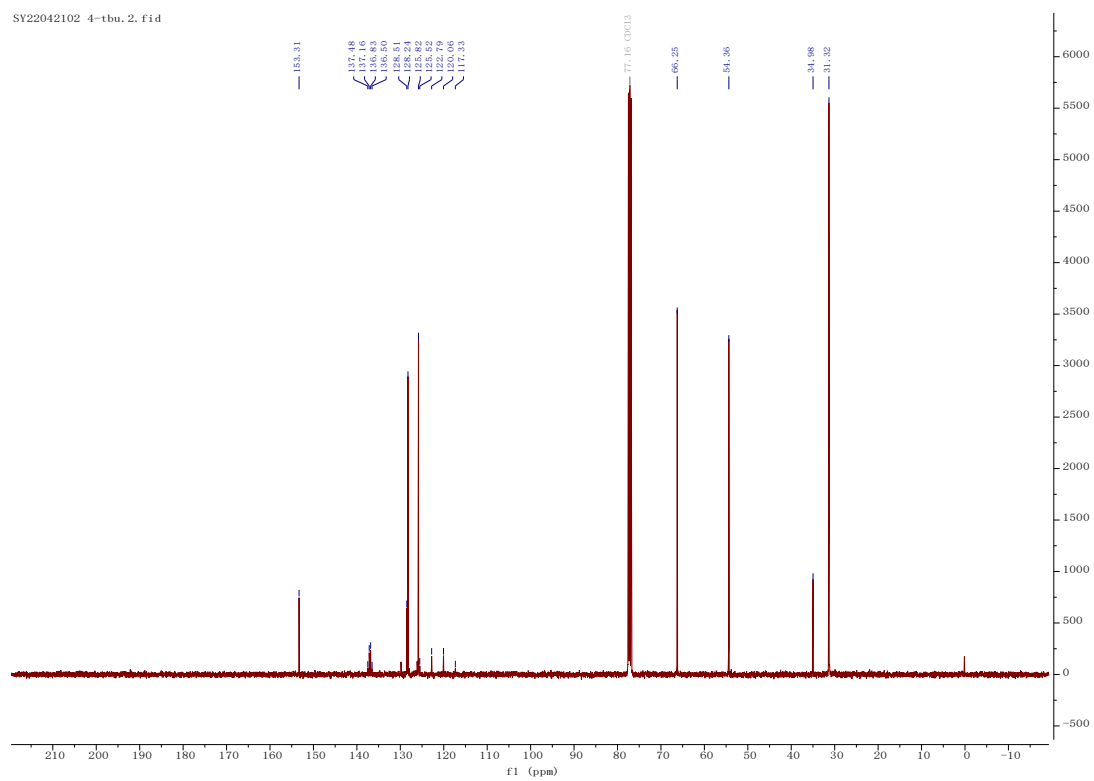

# <sup>19</sup>F NMR





# <sup>13</sup>C NMR

SY22052302. 2. fid

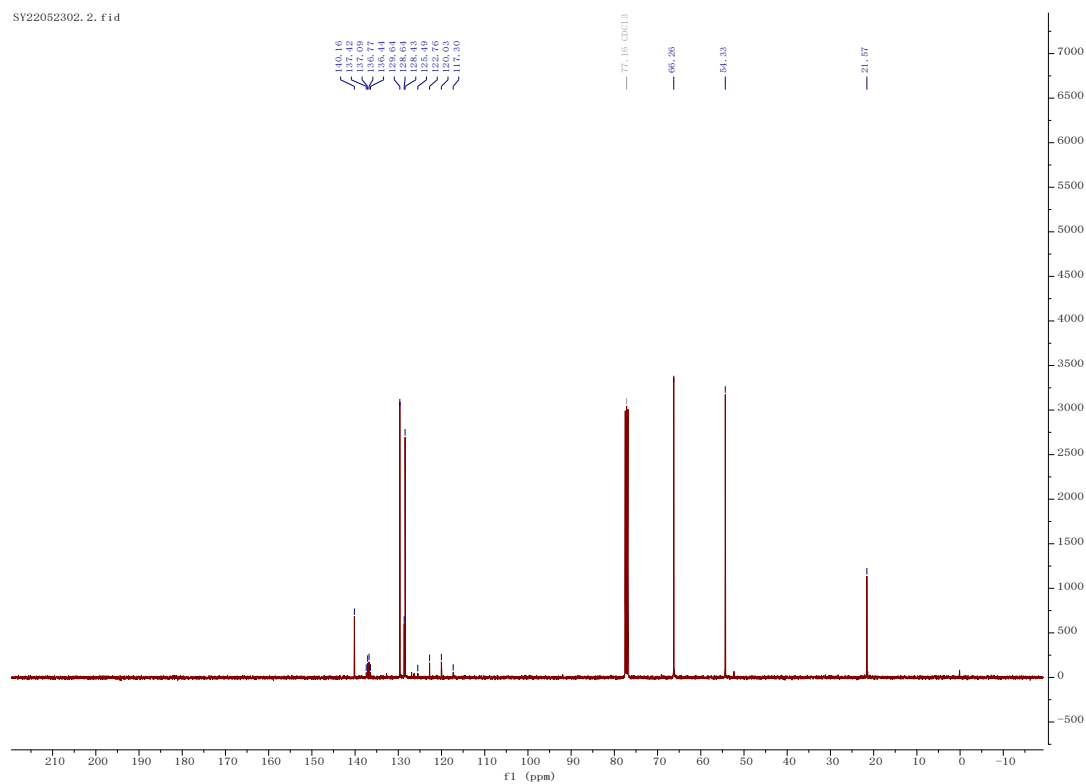

# <sup>19</sup>F NMR

SY22052302. 3. fid

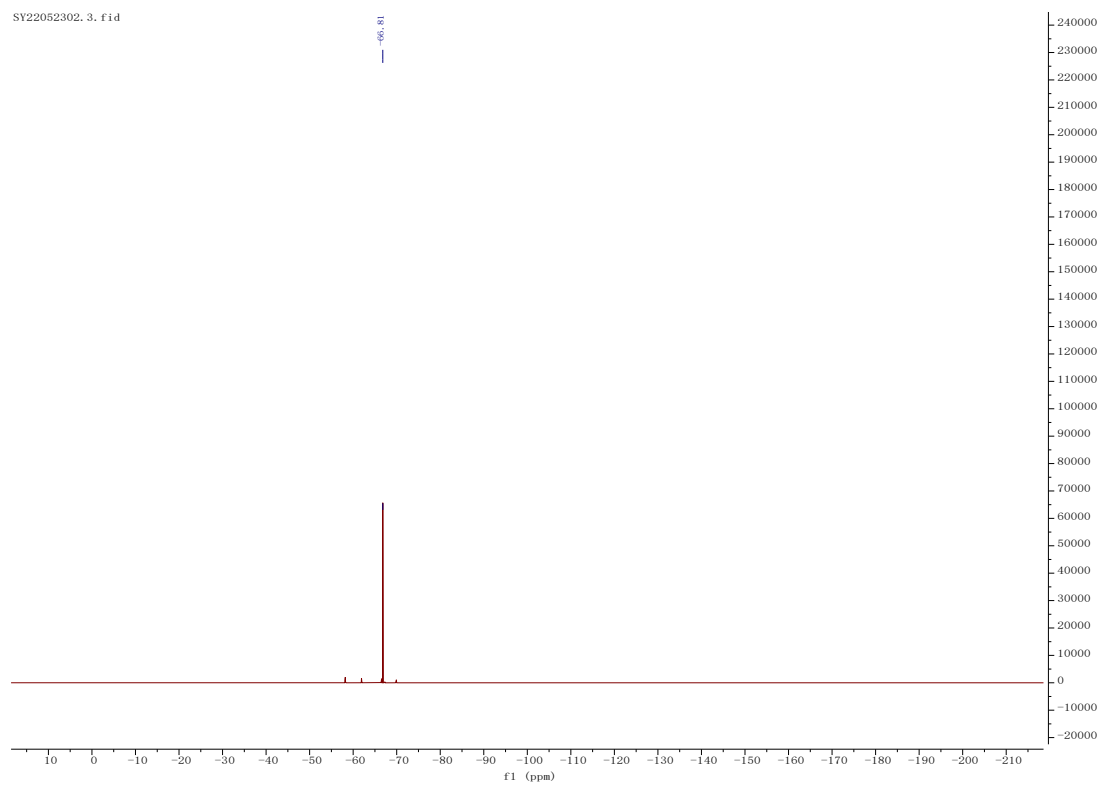

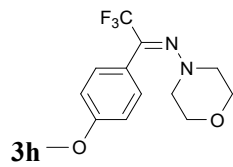

**<sup>1</sup>H NMR**

SV22053103. 1. F1d

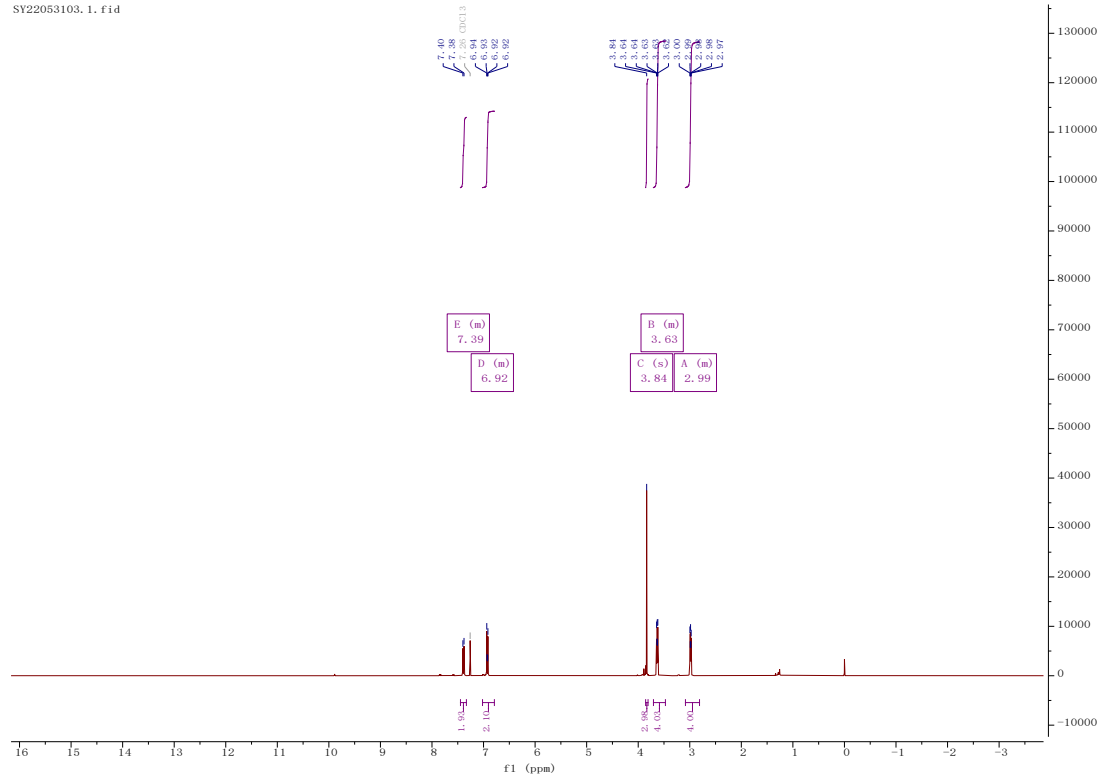

**<sup>13</sup>C NMR**

SV22053103. 2. F1d

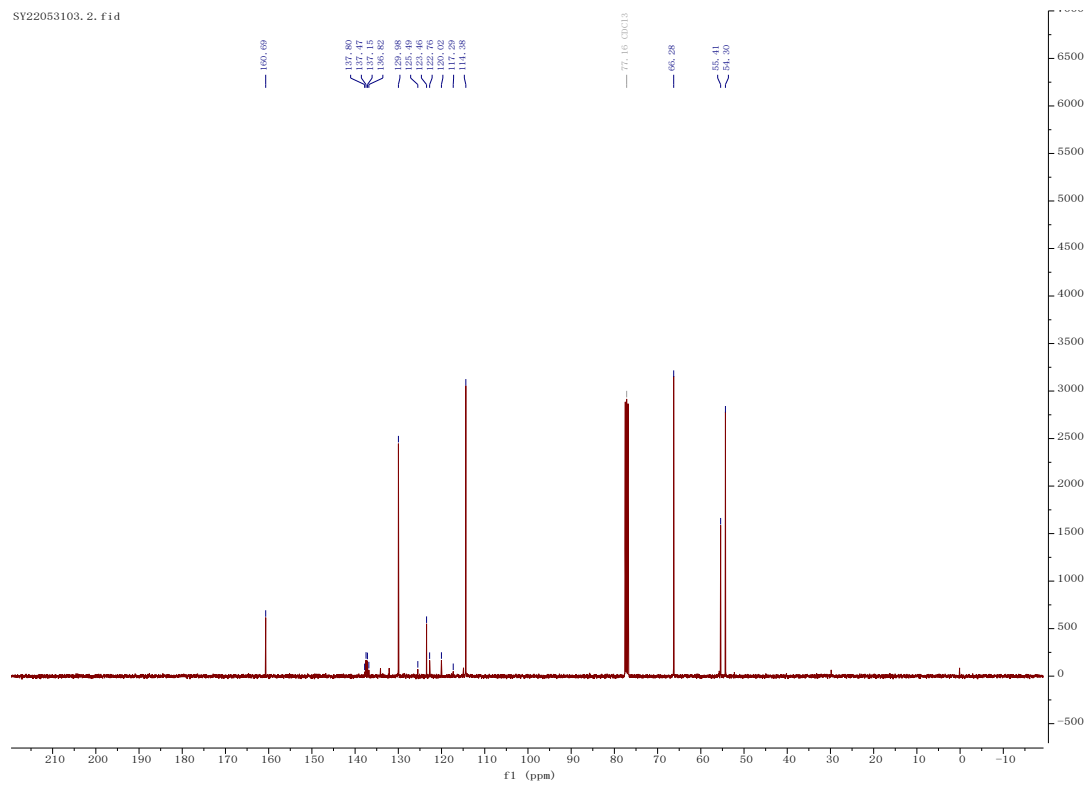

# <sup>19</sup>F NMR

SY22052303.3.fid

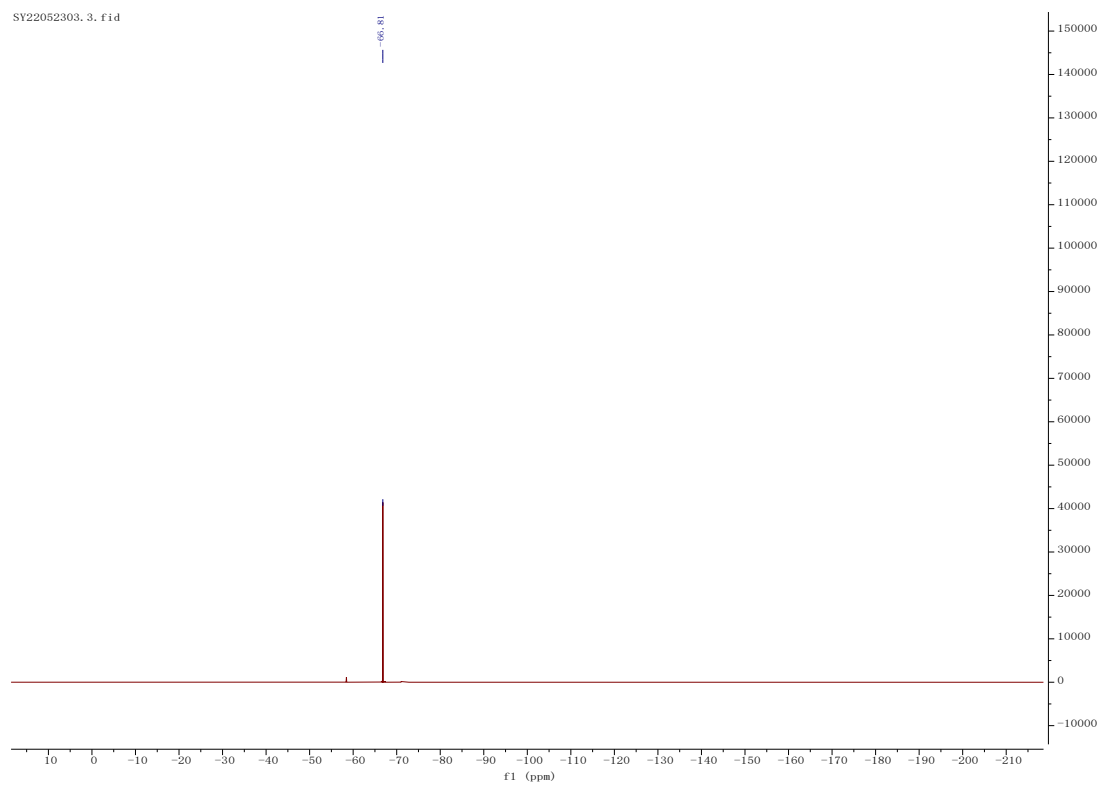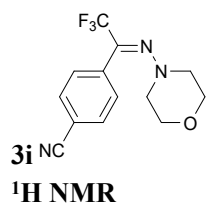

SY220323. 3. fid

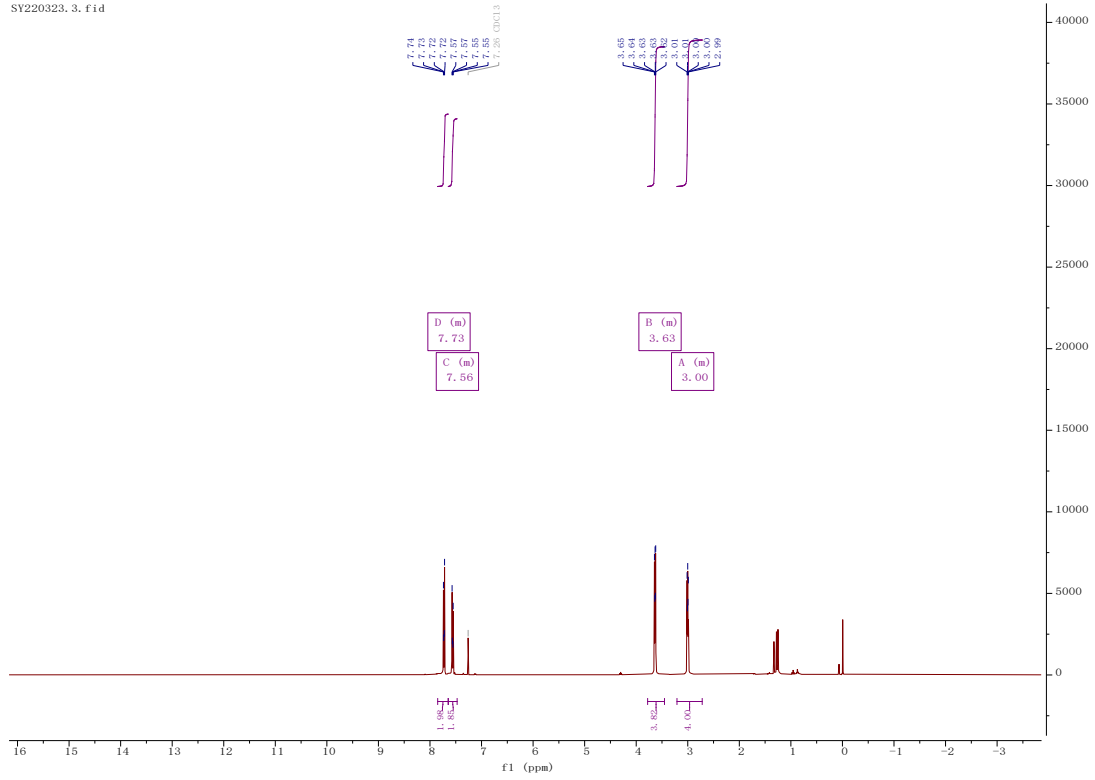

### <sup>13</sup>C NMR

SY220323. 1. fid  
13C

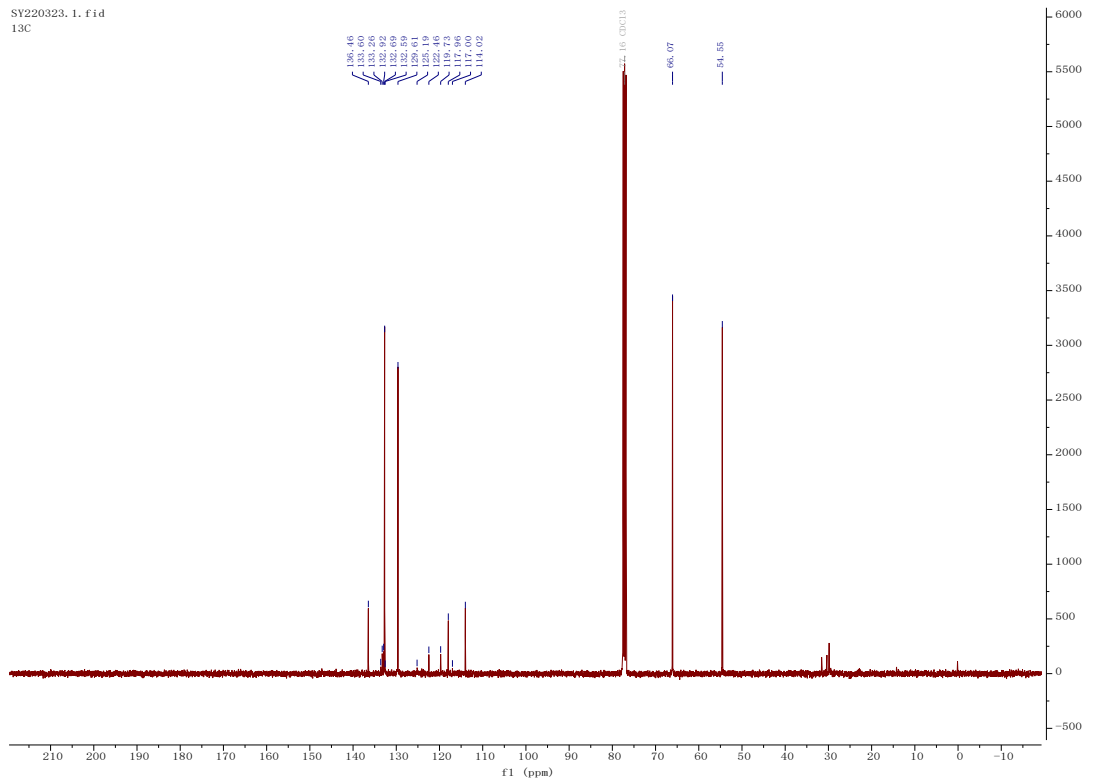

### <sup>19</sup>F NMR

4-氟基.2.fid

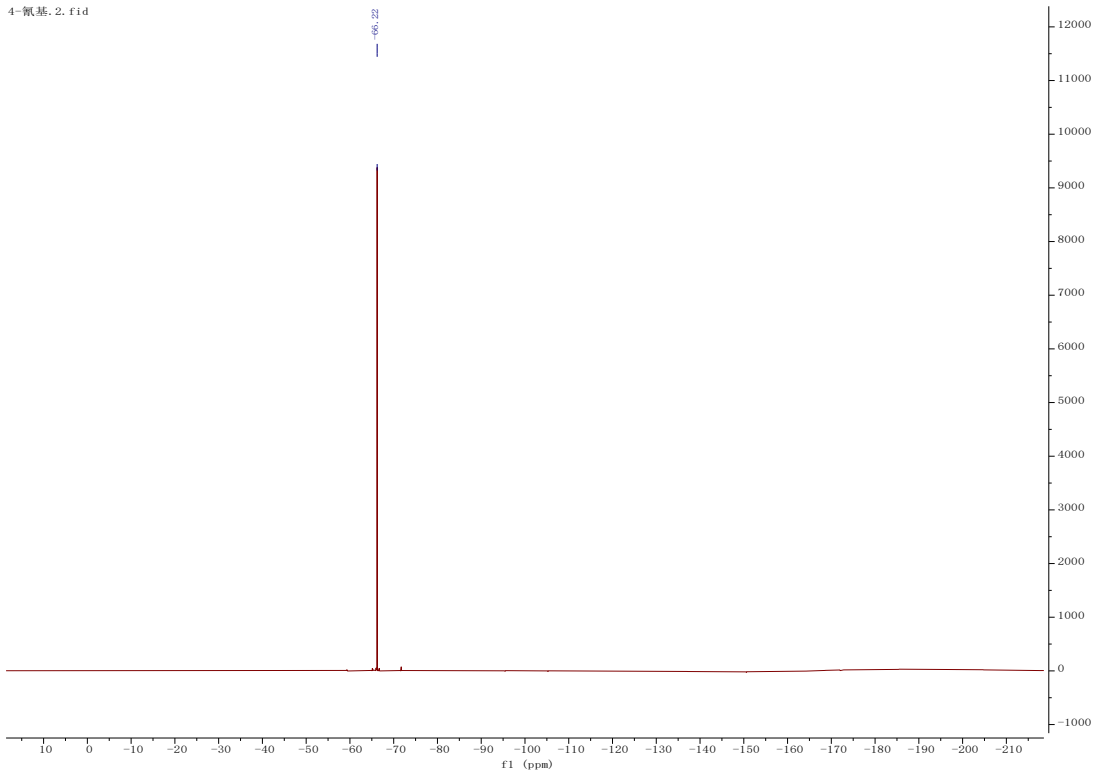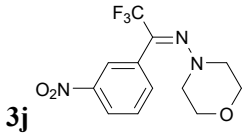

### <sup>1</sup>H NMR

sy220318 3-N02.1.fid  
1H

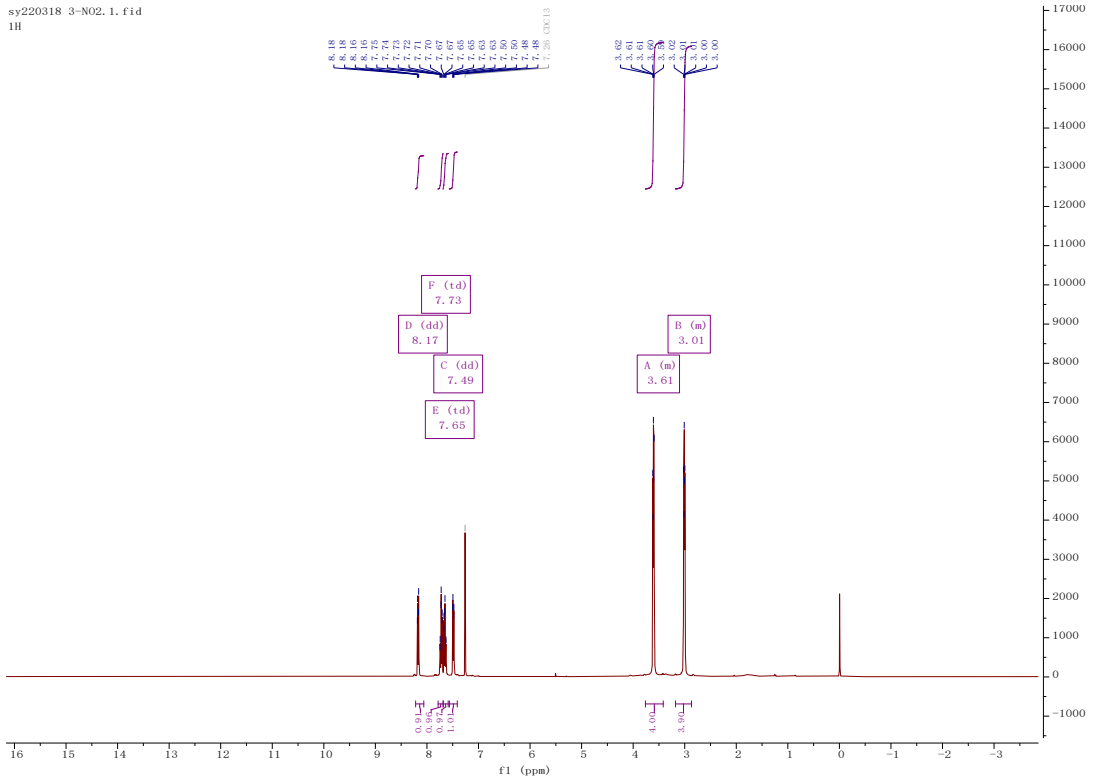

# <sup>13</sup>C NMR

sy220318 3-N02.2.fid  
13C

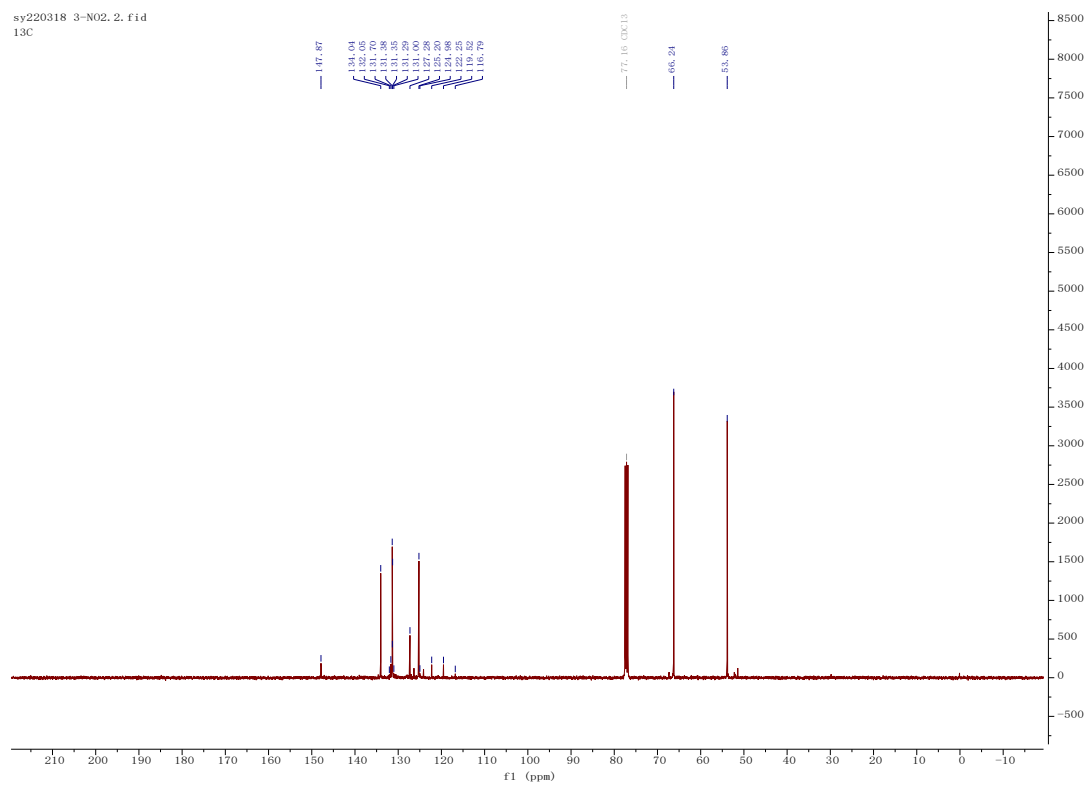

# <sup>19</sup>F NMR

sy220318 3-N02.3.fid  
19F

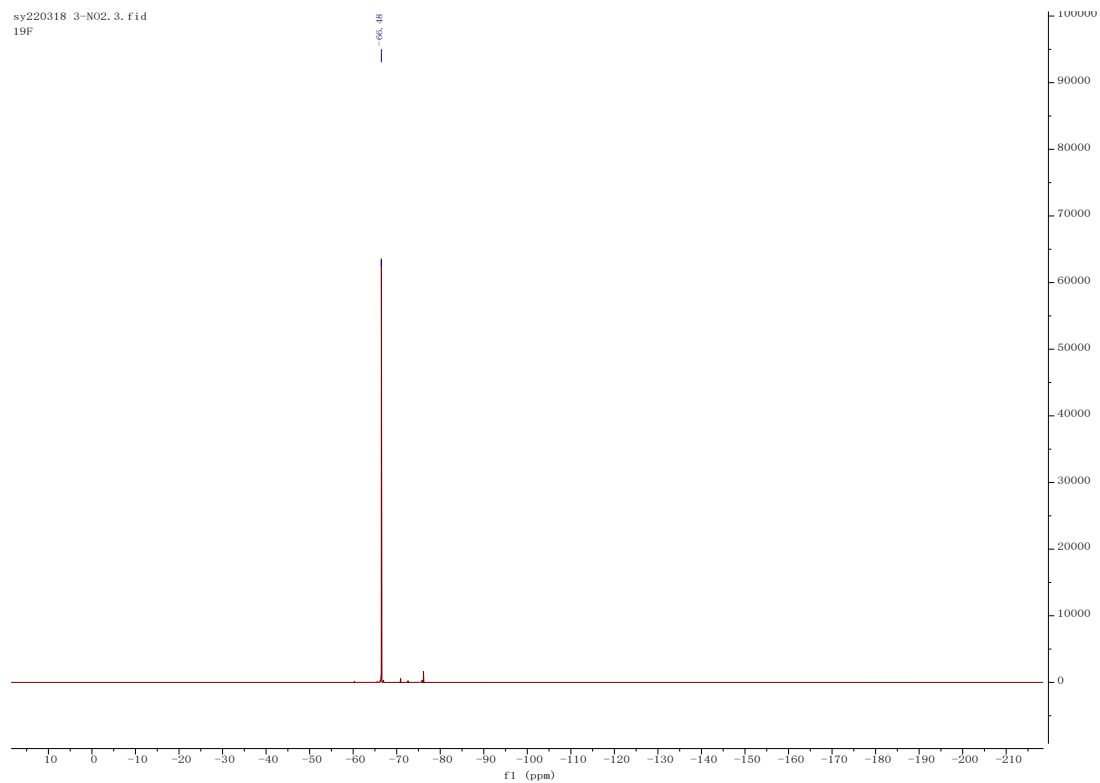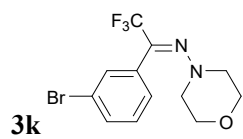





SY22041901 3-Br. 3. fid

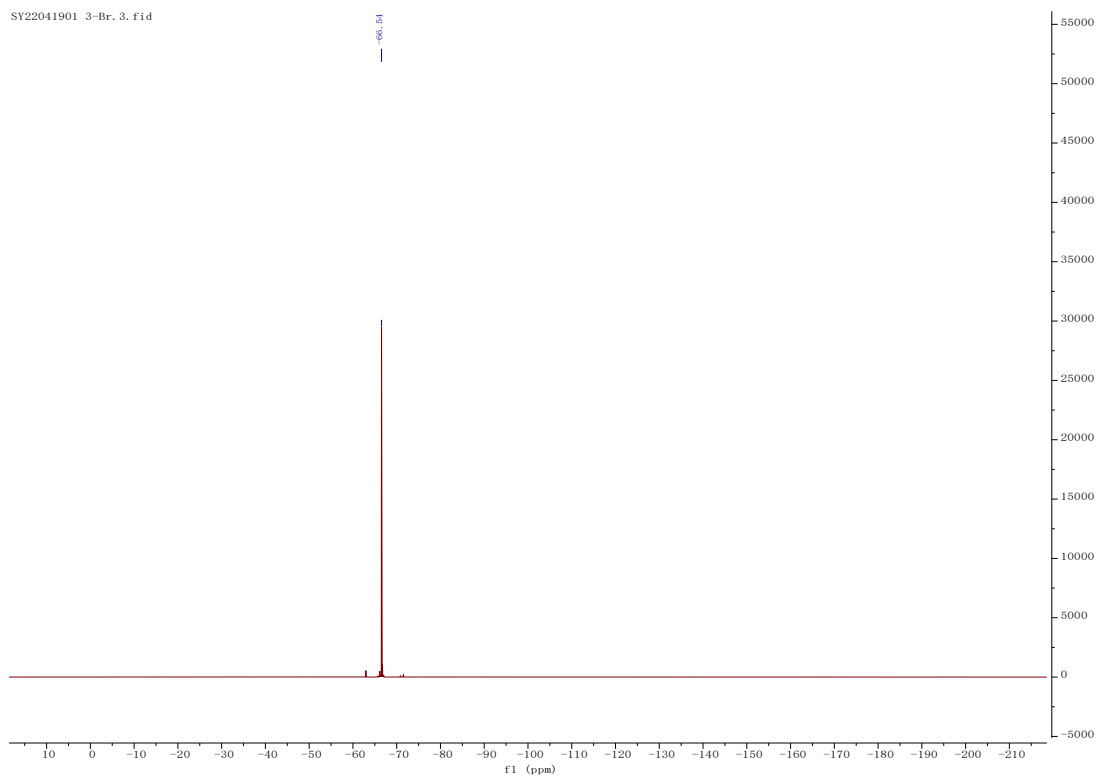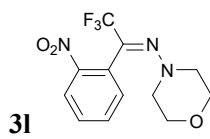

**<sup>1</sup>H NMR**

SY220314.1.fid  
1H

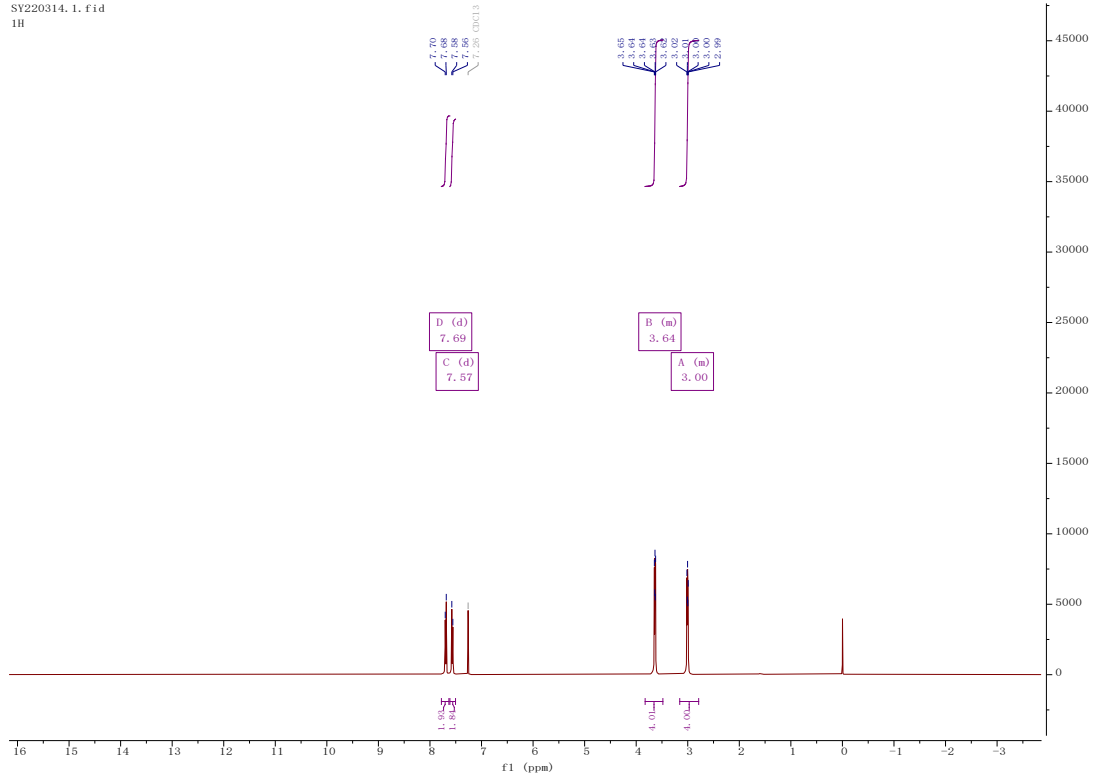

### <sup>13</sup>C NMR

SY220608.2.fid

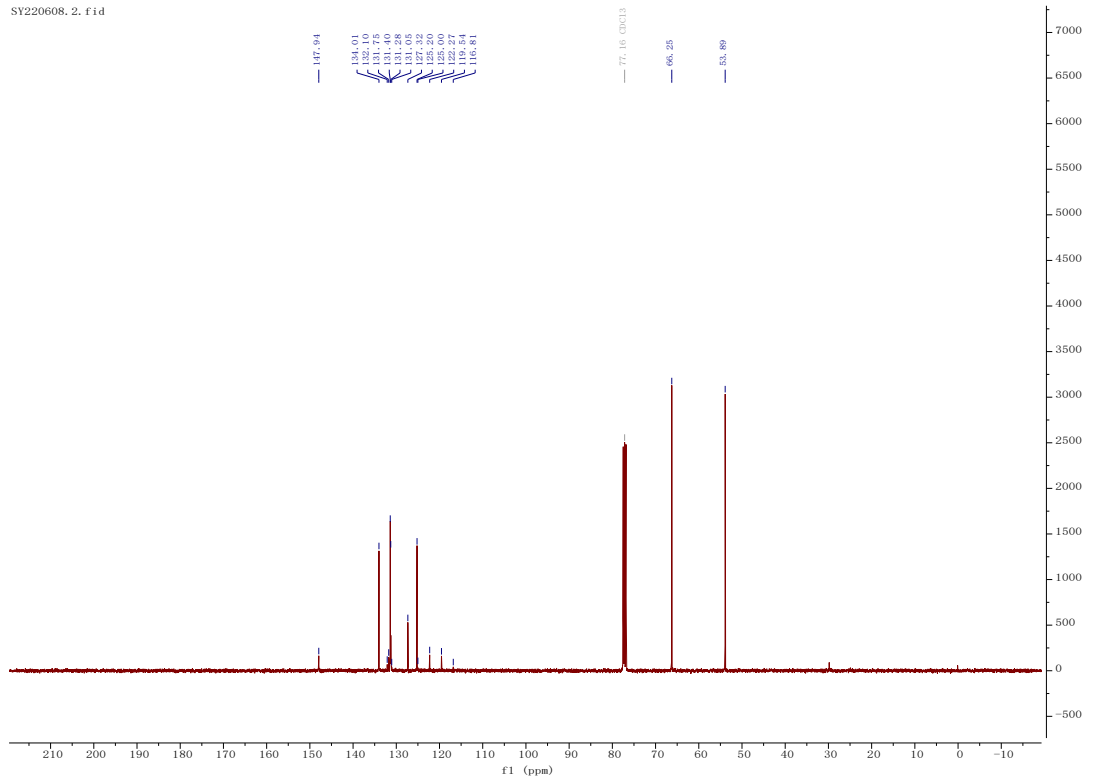

### <sup>19</sup>F NMR

SY220608.1.fid

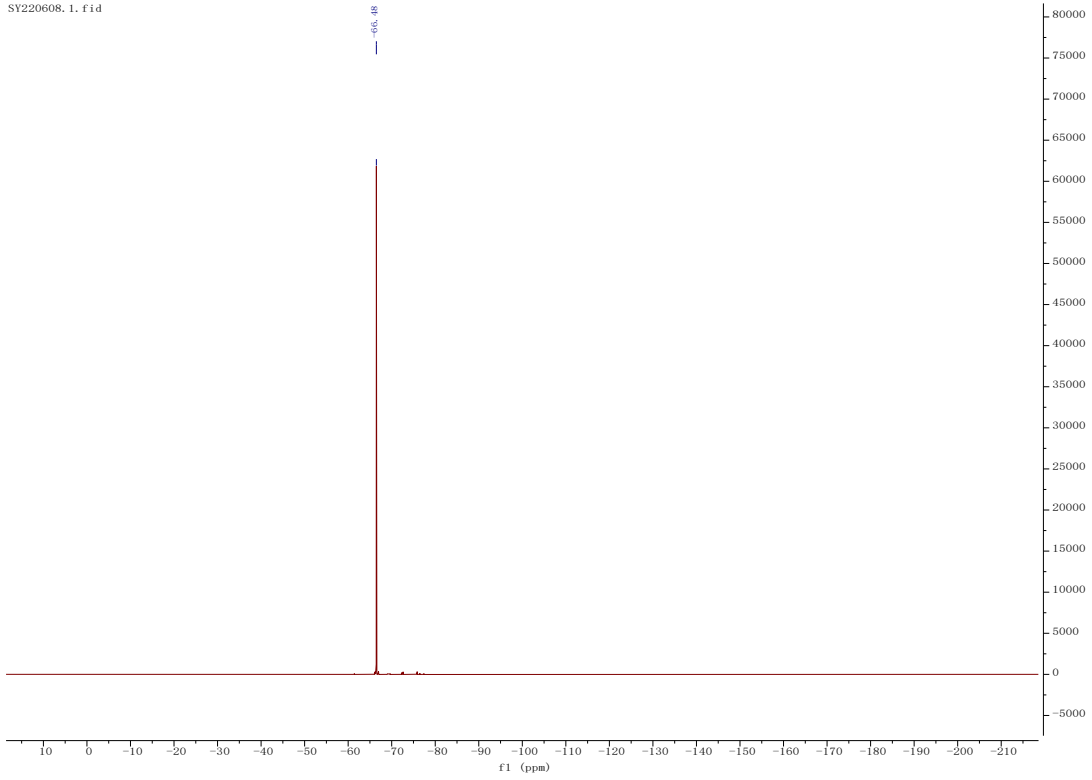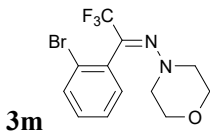

**1H NMR**

SY22041102

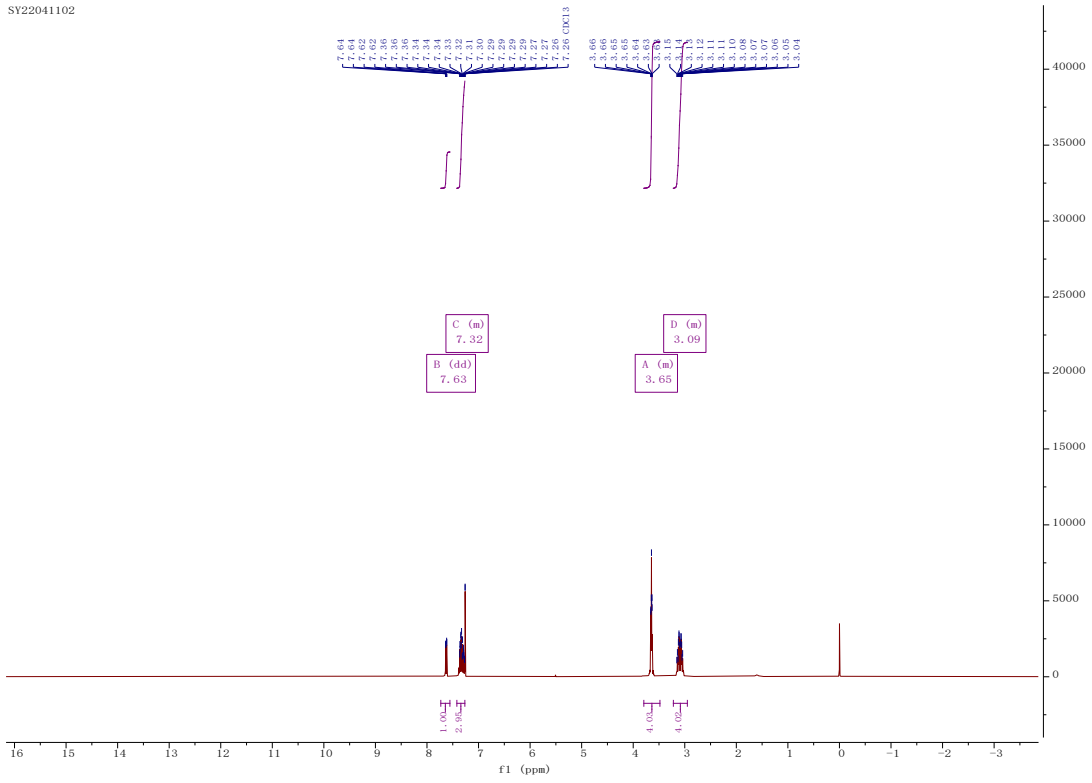

**13C NMR**

SY22041102-2  
13C

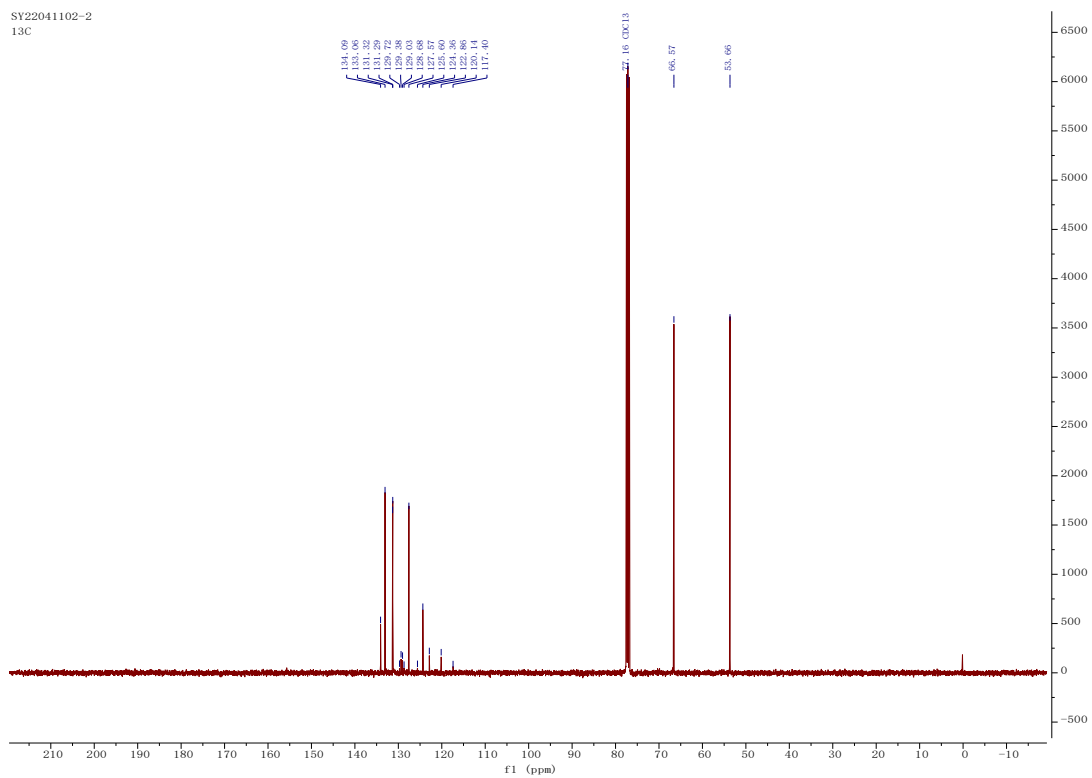

## <sup>19</sup>F NMR

SY22041102 2-Br. 3. fid  
19F

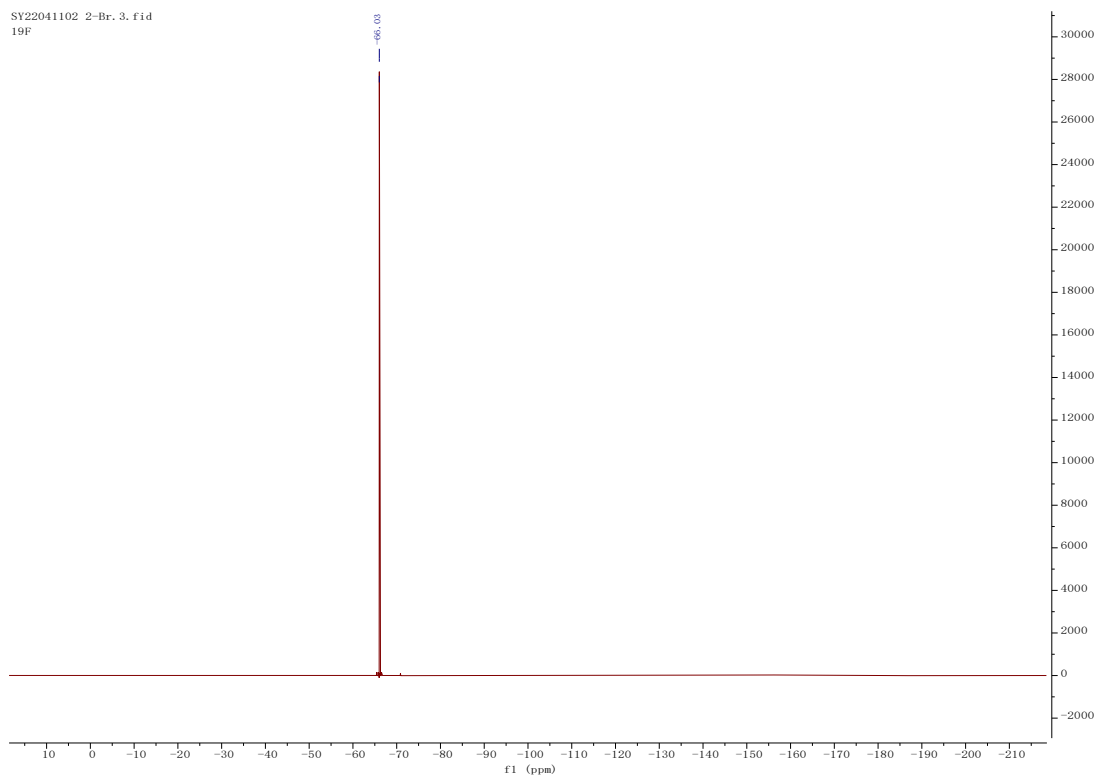

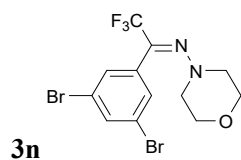

**<sup>1</sup>H NMR**

XYX-SY220103

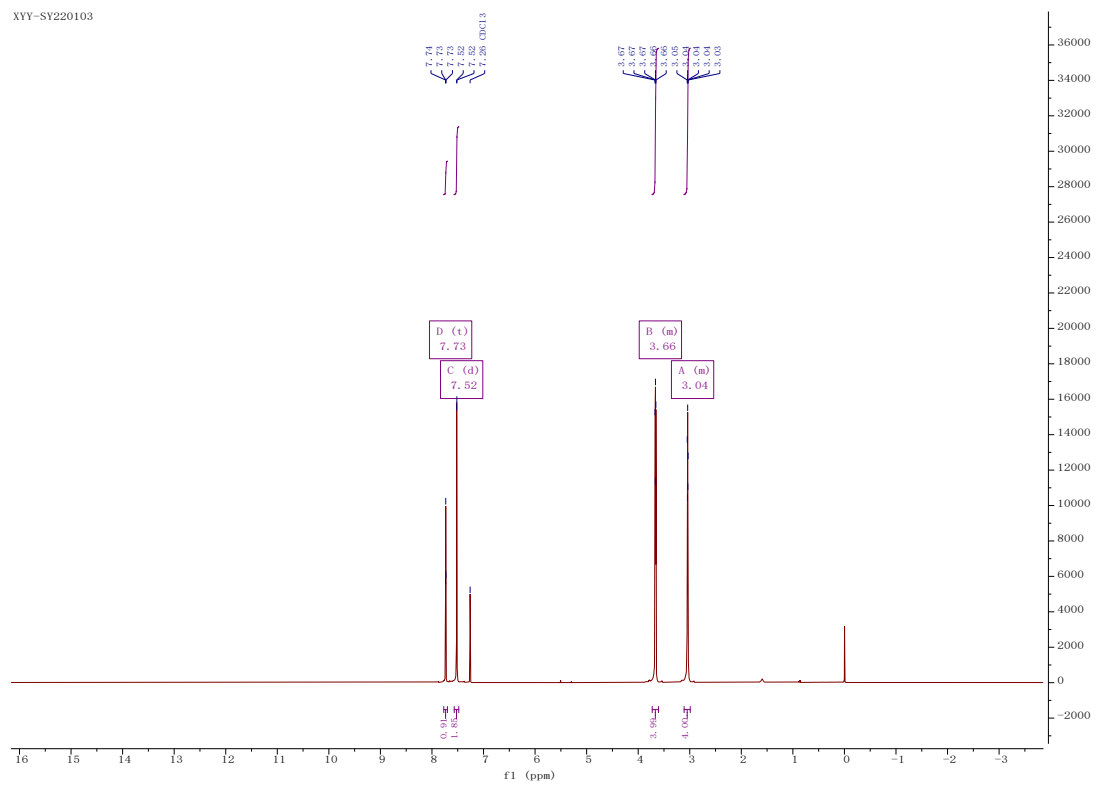

**<sup>13</sup>C NMR**

XYV-SY220103

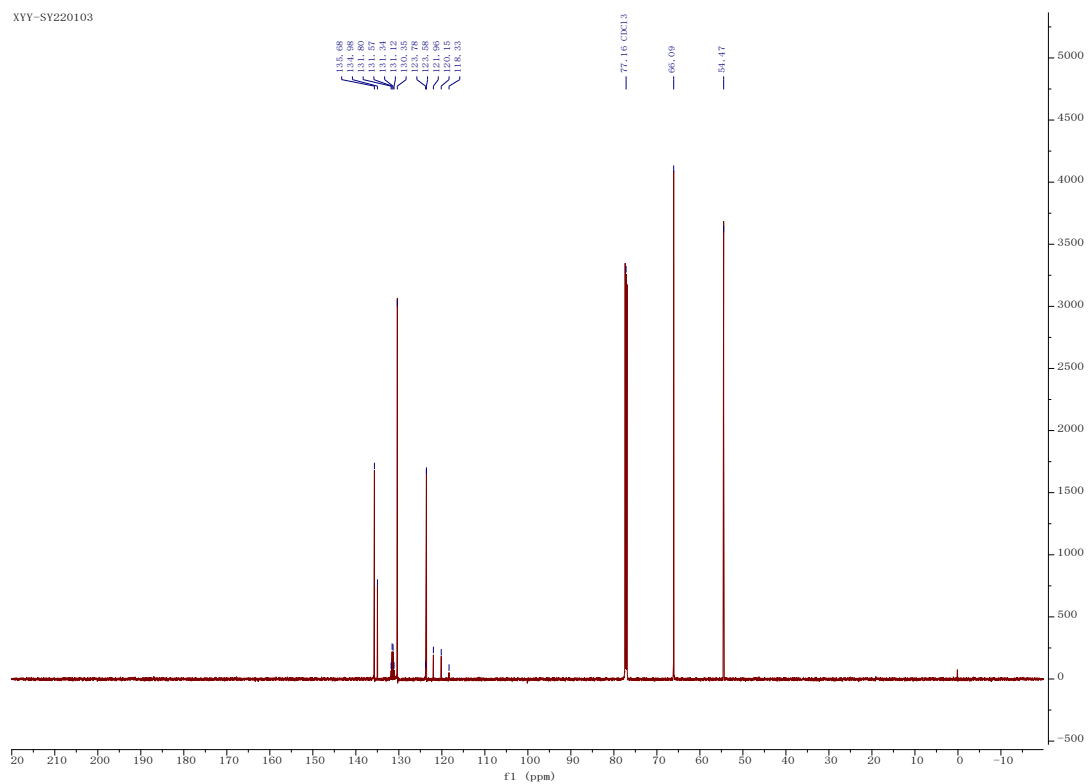

### <sup>19</sup>F NMR

XYV-SY220103

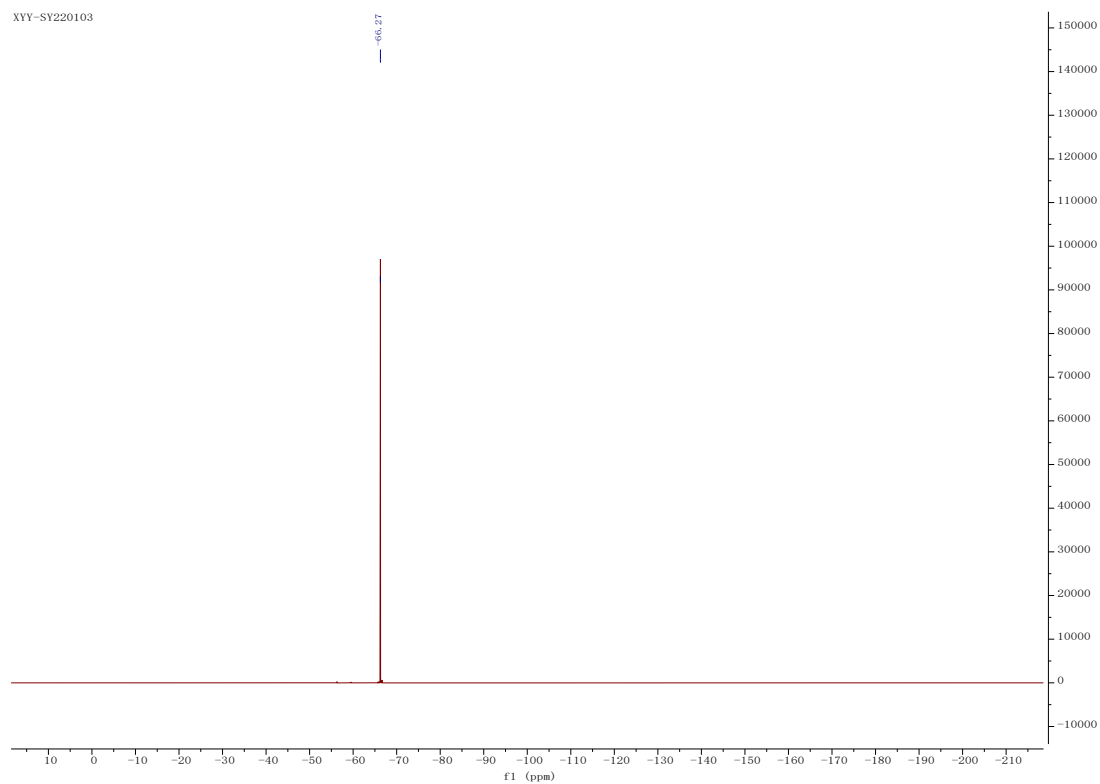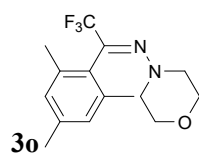

### <sup>1</sup>H NMR

SY220531.1.fid

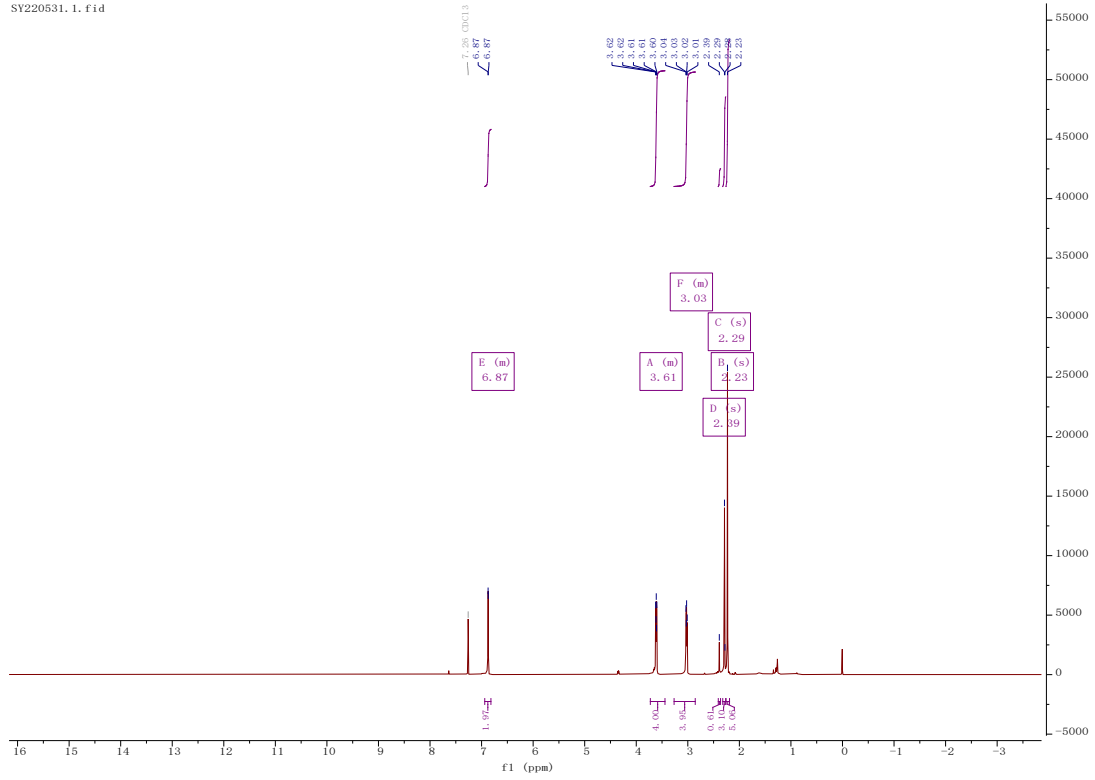

### <sup>13</sup>C NMR

SY220531.2.fid

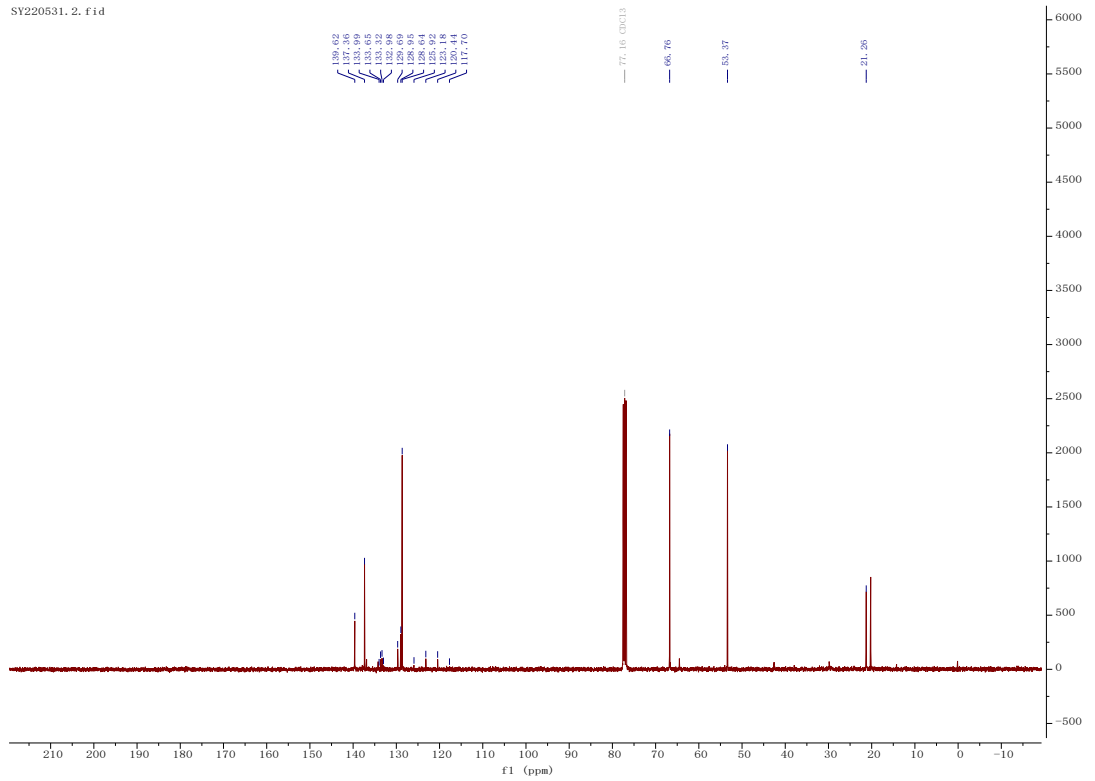

### <sup>19</sup>F NMR

SY220531.3.fid

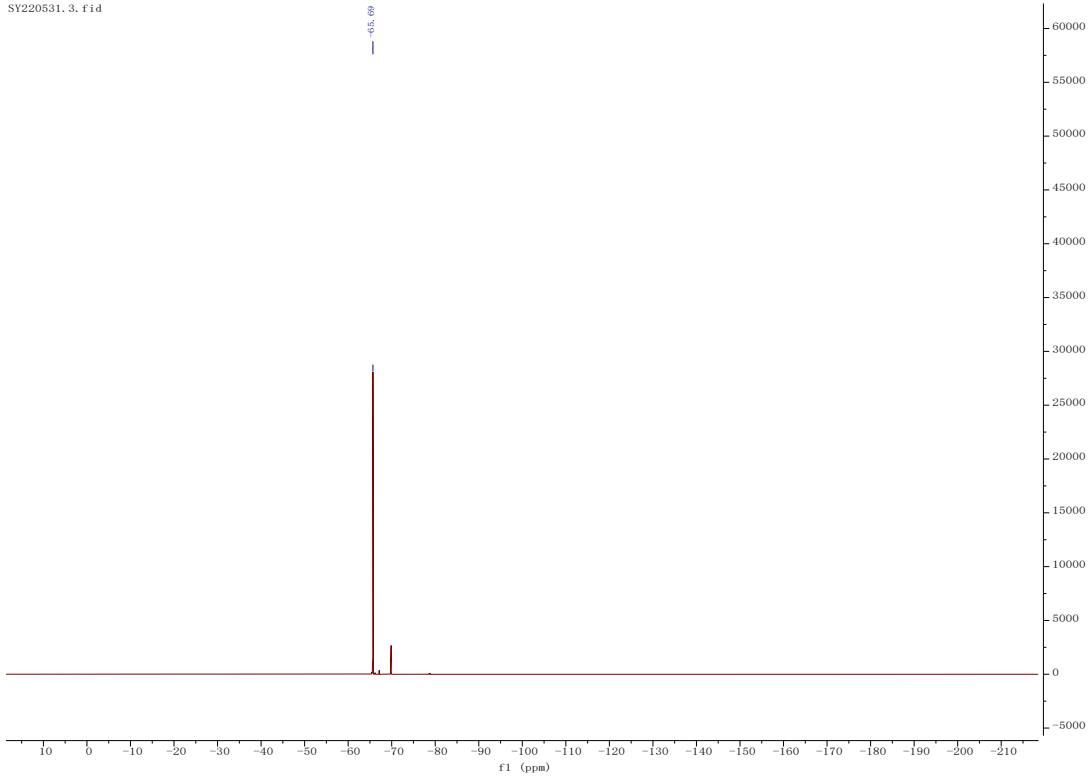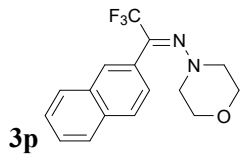

**<sup>1</sup>H NMR**

SY220407.2.fid  
1H

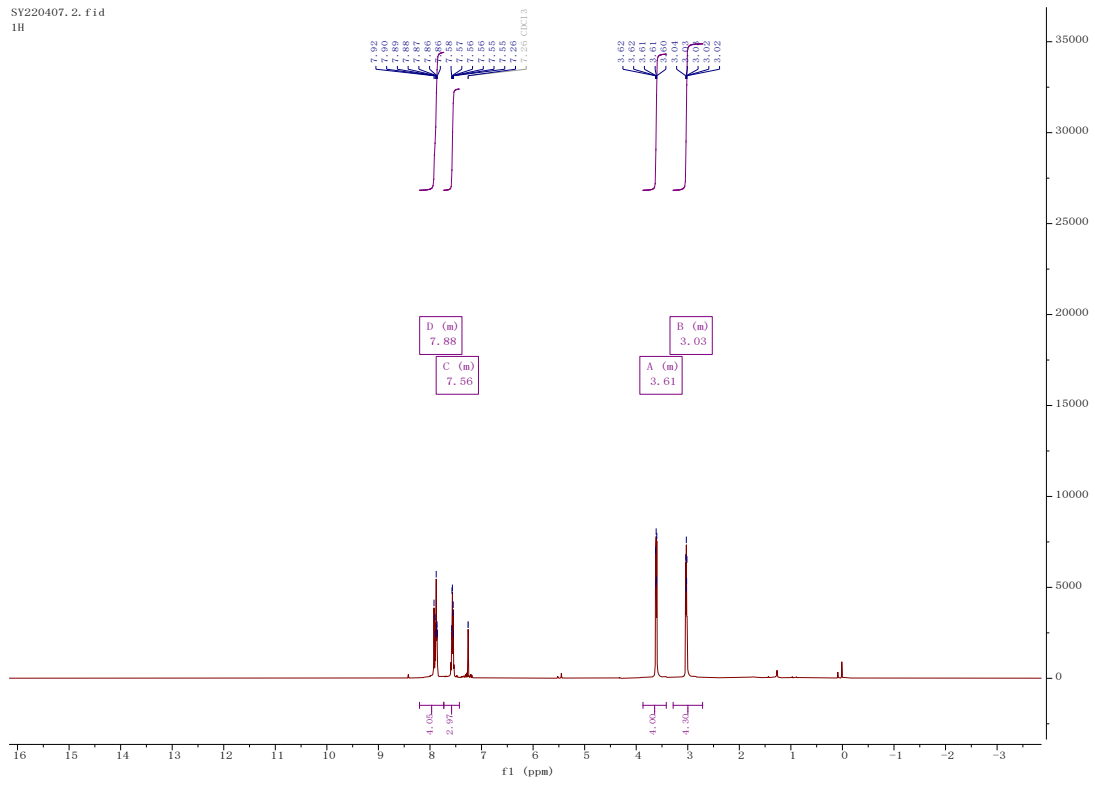



# <sup>13</sup>C NMR

SY220407 禁. 3. fid

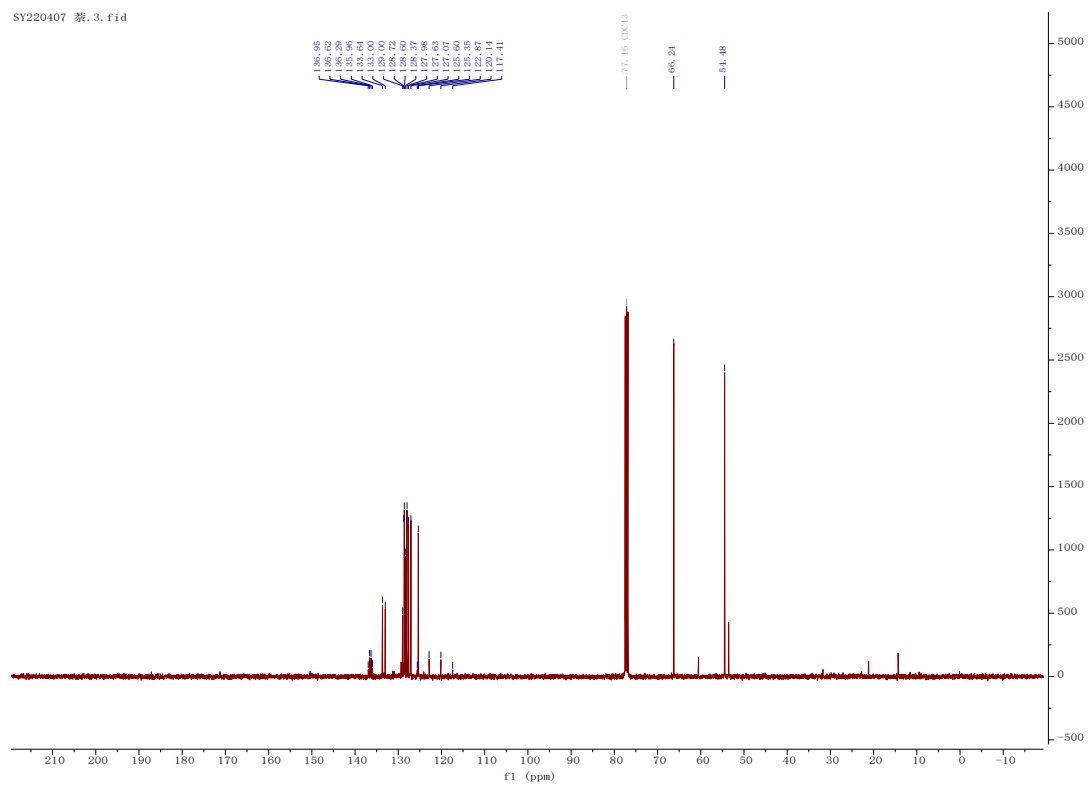

# <sup>19</sup>F NMR

SY220407 禁. 4. fid

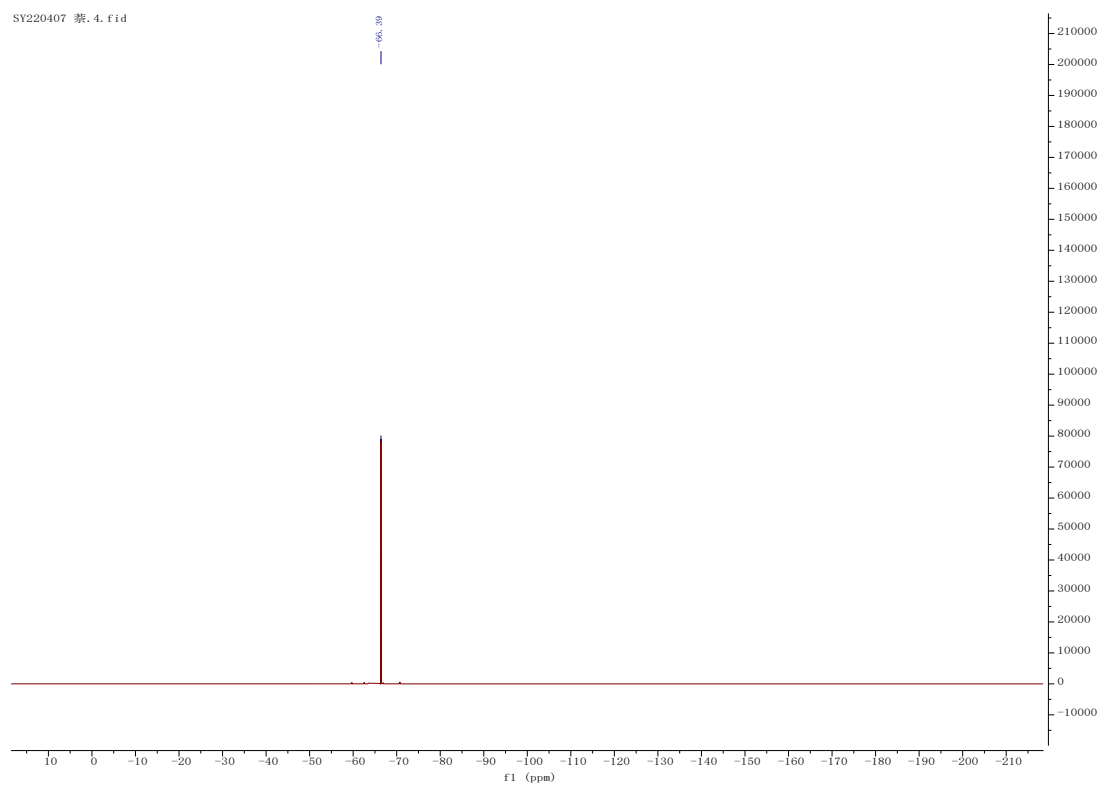





# <sup>13</sup>C NMR

sy22031502  
13C

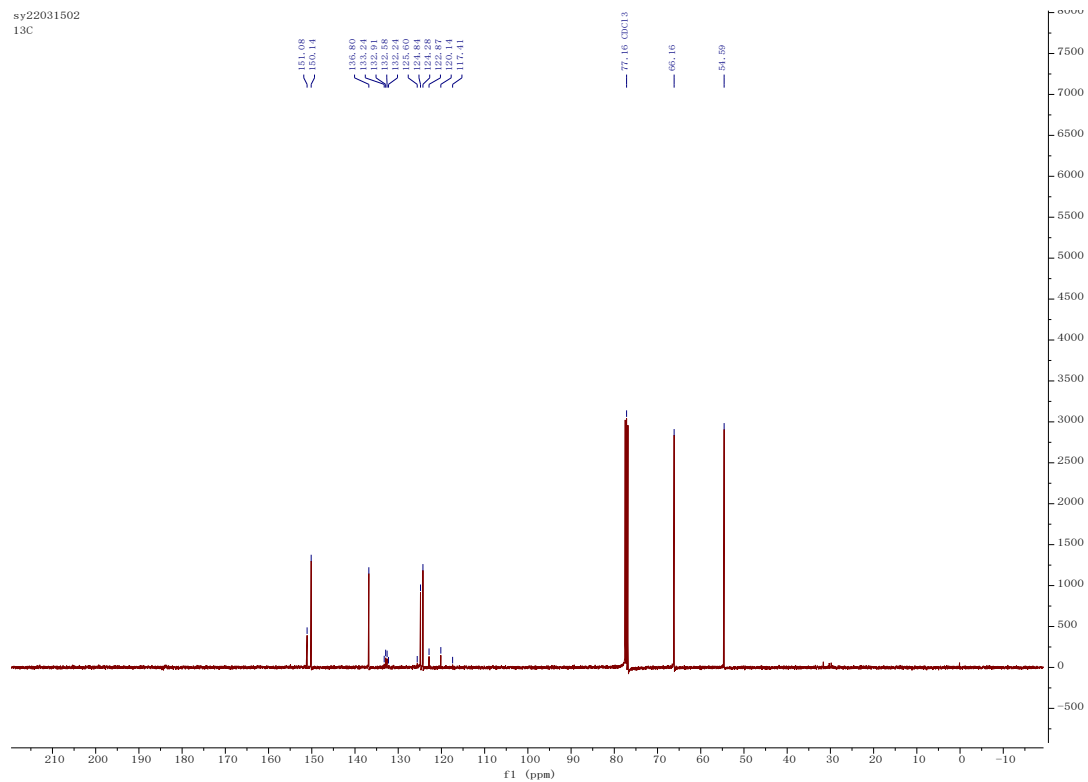

# <sup>19</sup>F NMR

sy22031502  
19F

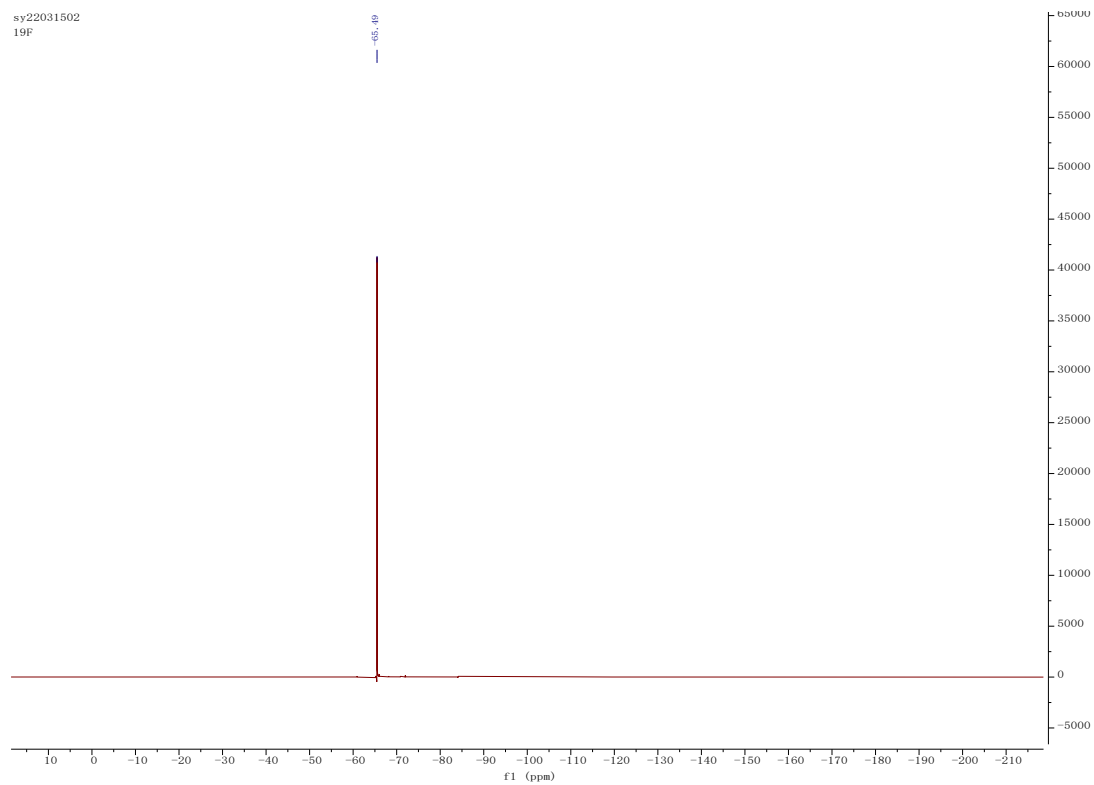

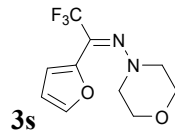

**<sup>1</sup>H NMR**

sy2022022503  
1H

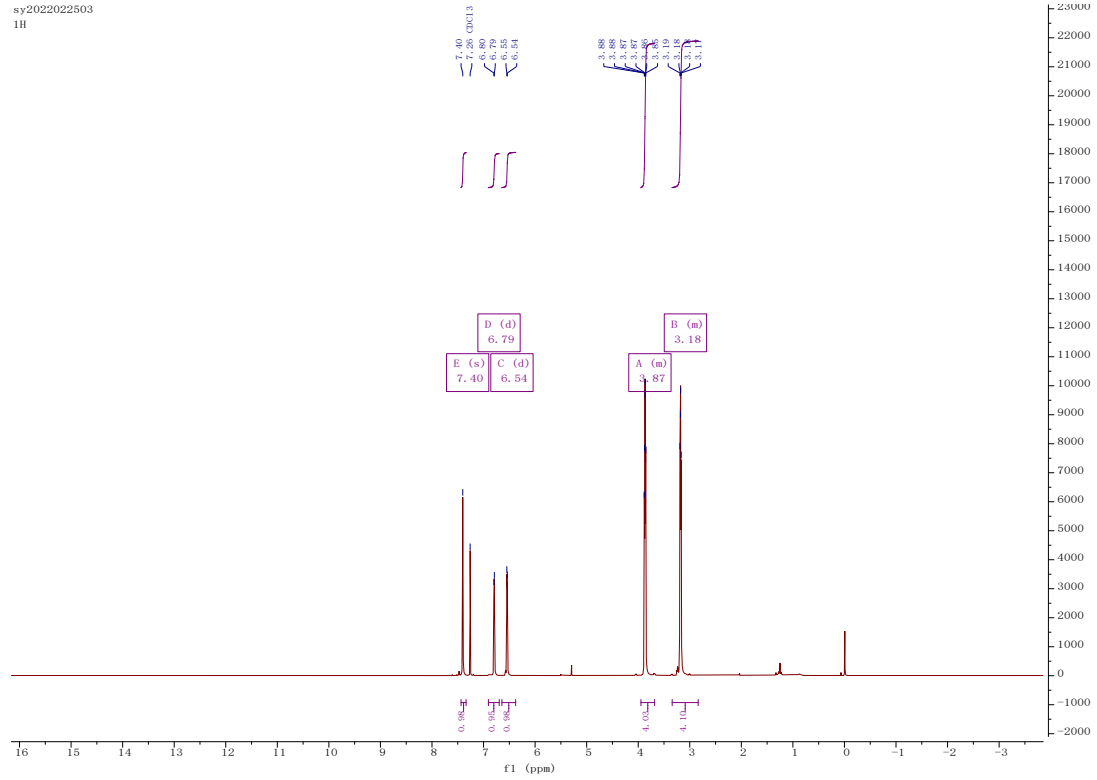

**<sup>13</sup>C NMR**

sy2022022503  
13C

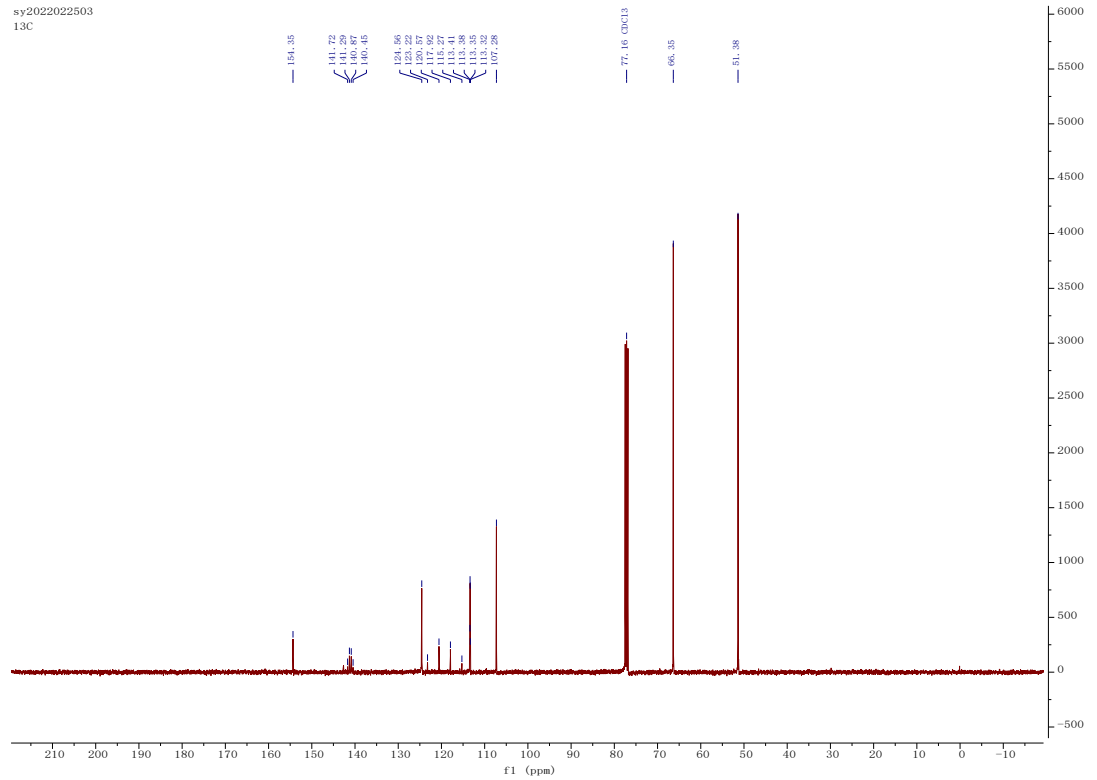

# <sup>19</sup>F NMR

sy2022022503  
19F

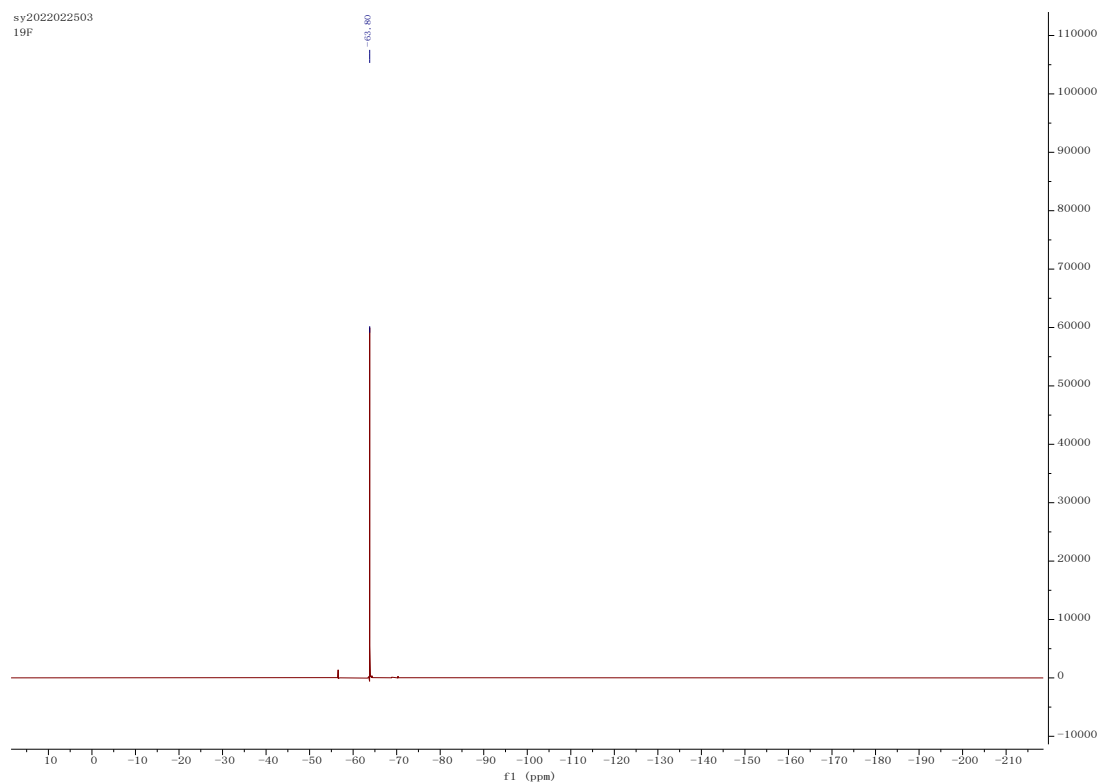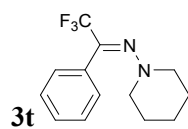

# <sup>1</sup>H NMR

SY22053102. 1. F1d

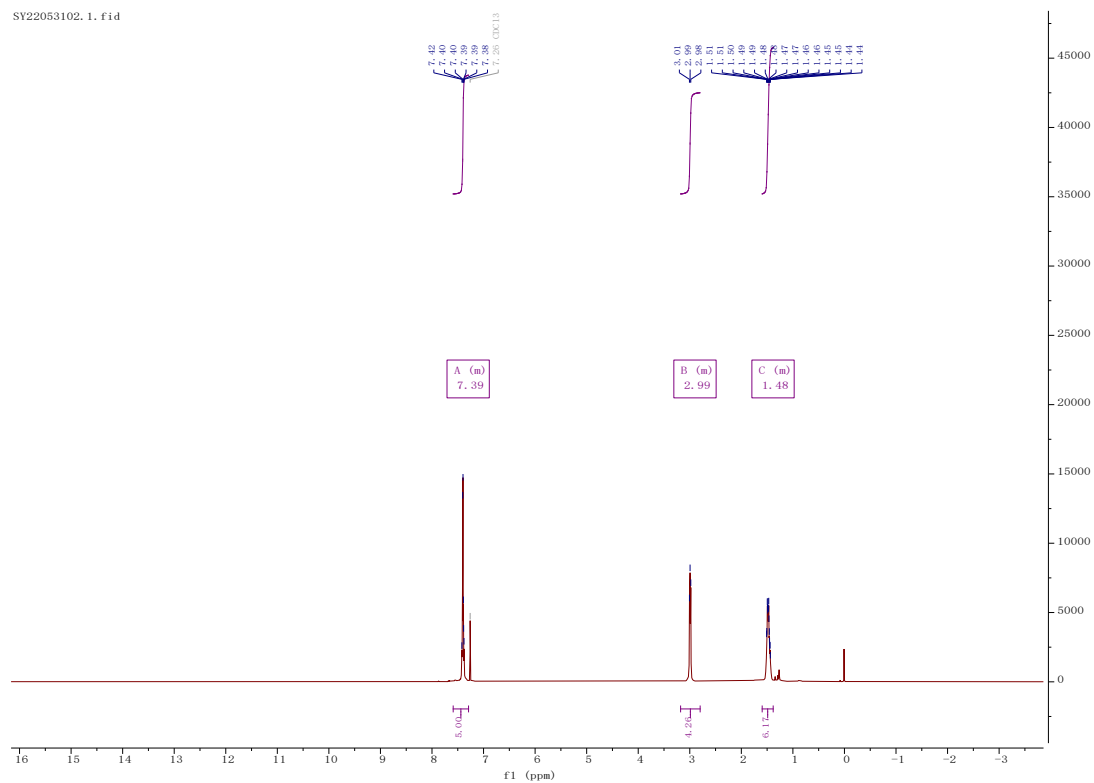

# <sup>13</sup>C NMR

SY22053102. 2. fid

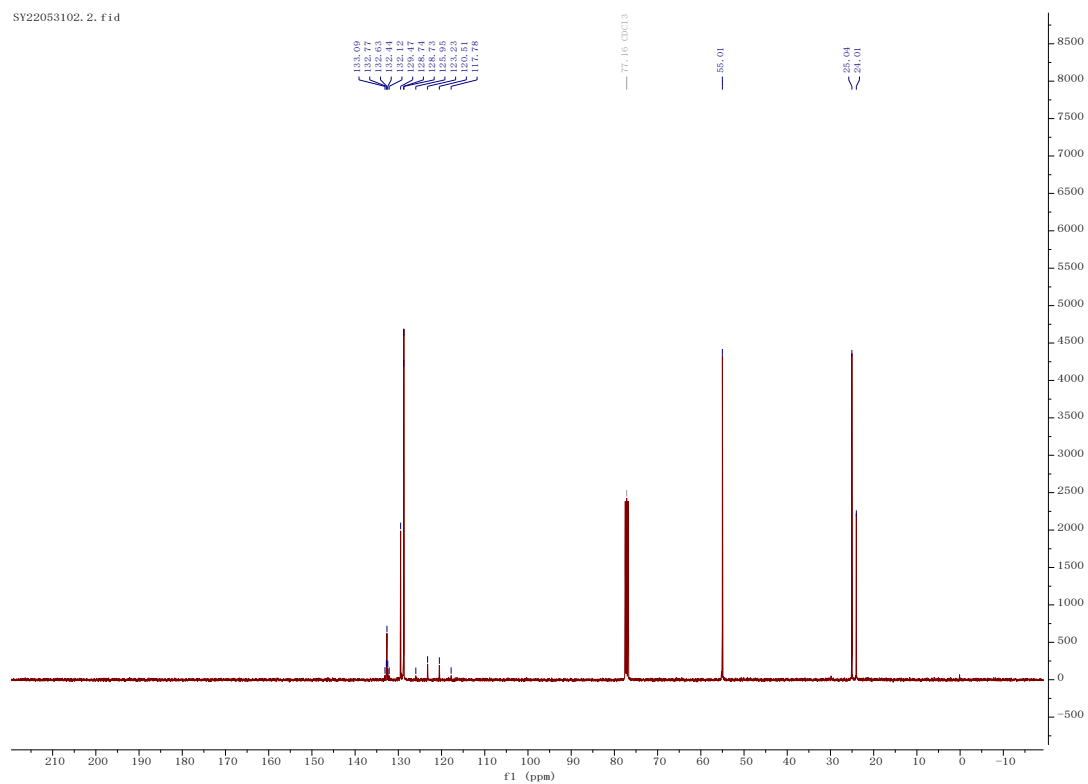

# <sup>19</sup>F NMR

SY22053102. 3. fid

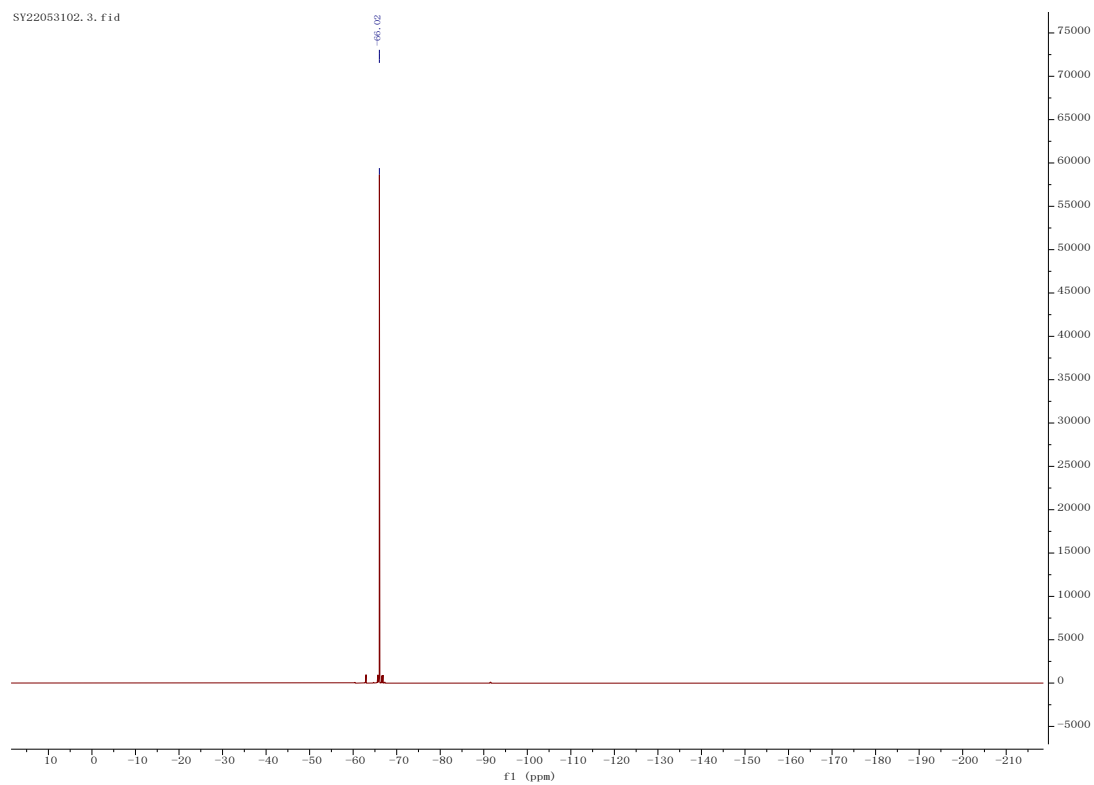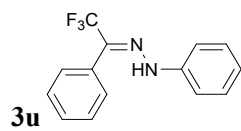

# <sup>1</sup>H NMR

SY22041903

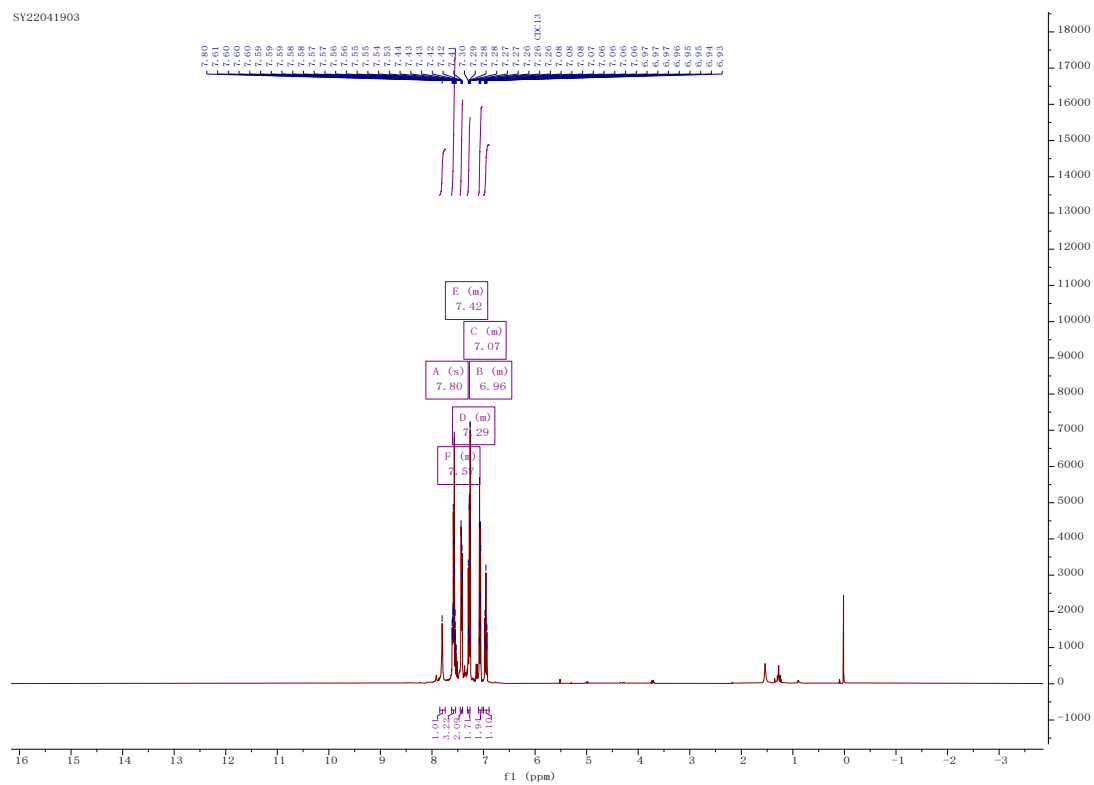

# <sup>13</sup>C NMR

SY22041903

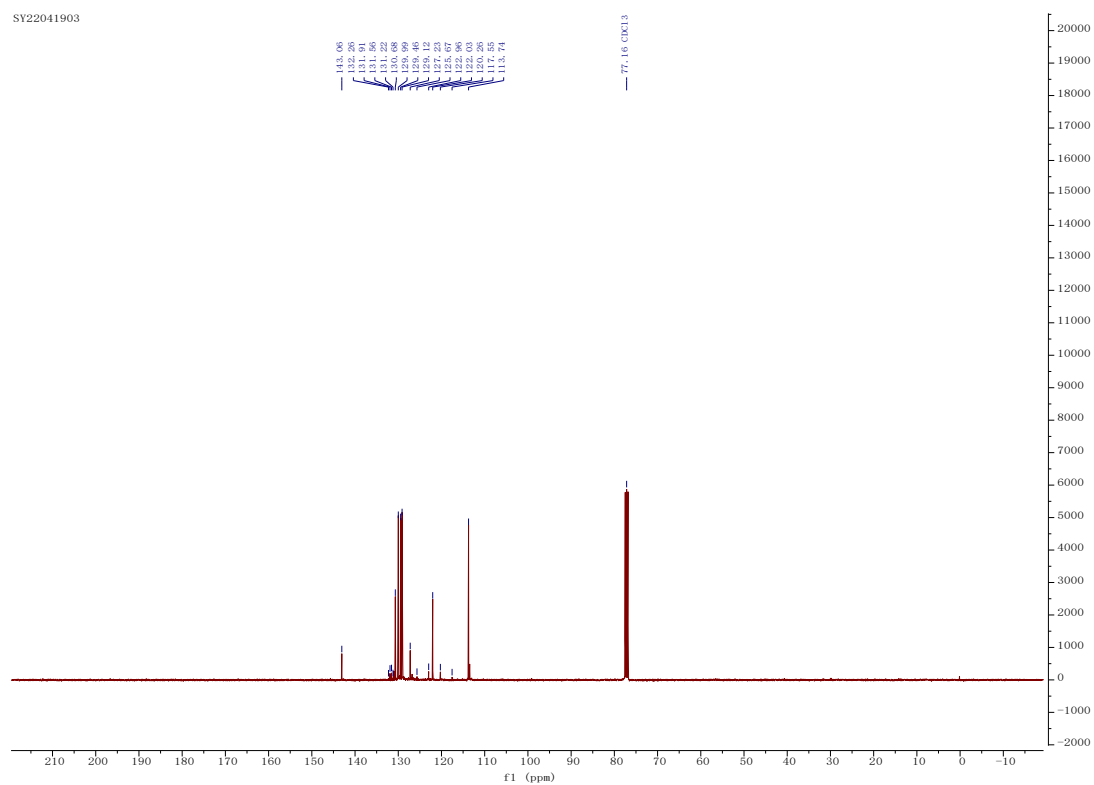

# <sup>19</sup>F NMR





# <sup>13</sup>C NMR

sy22051603.2.fid

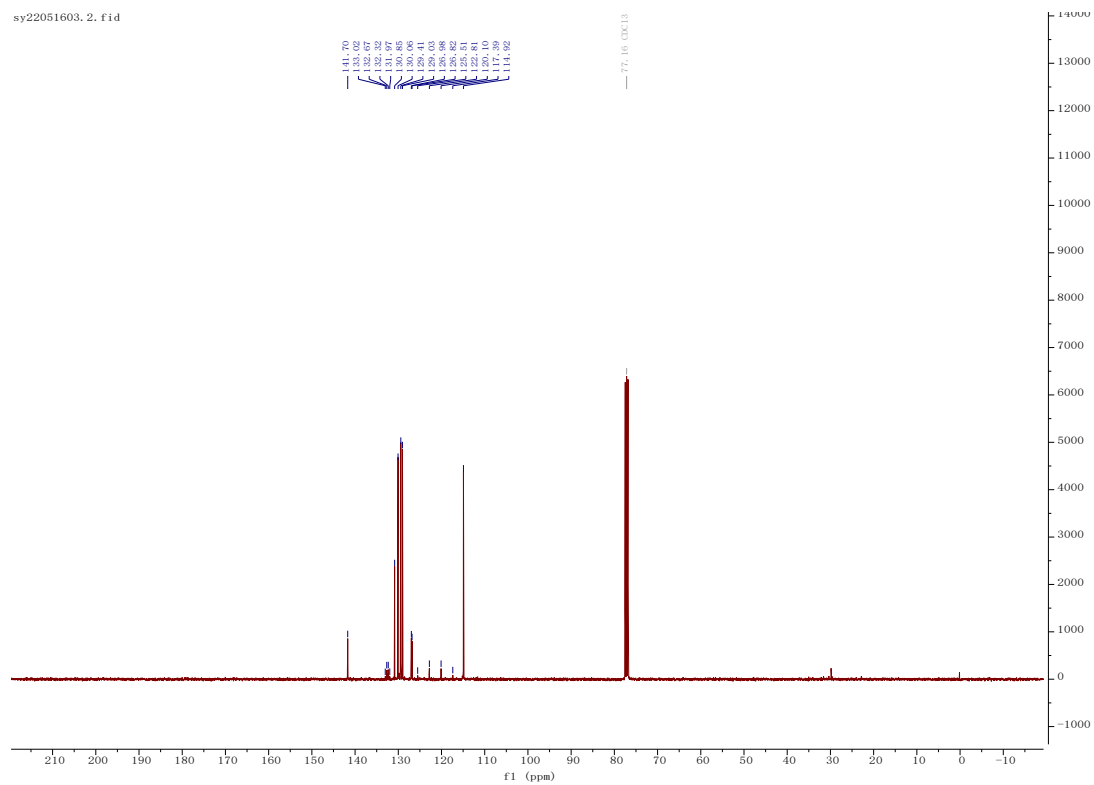

# <sup>19</sup>F NMR

SY22050602.2.fid

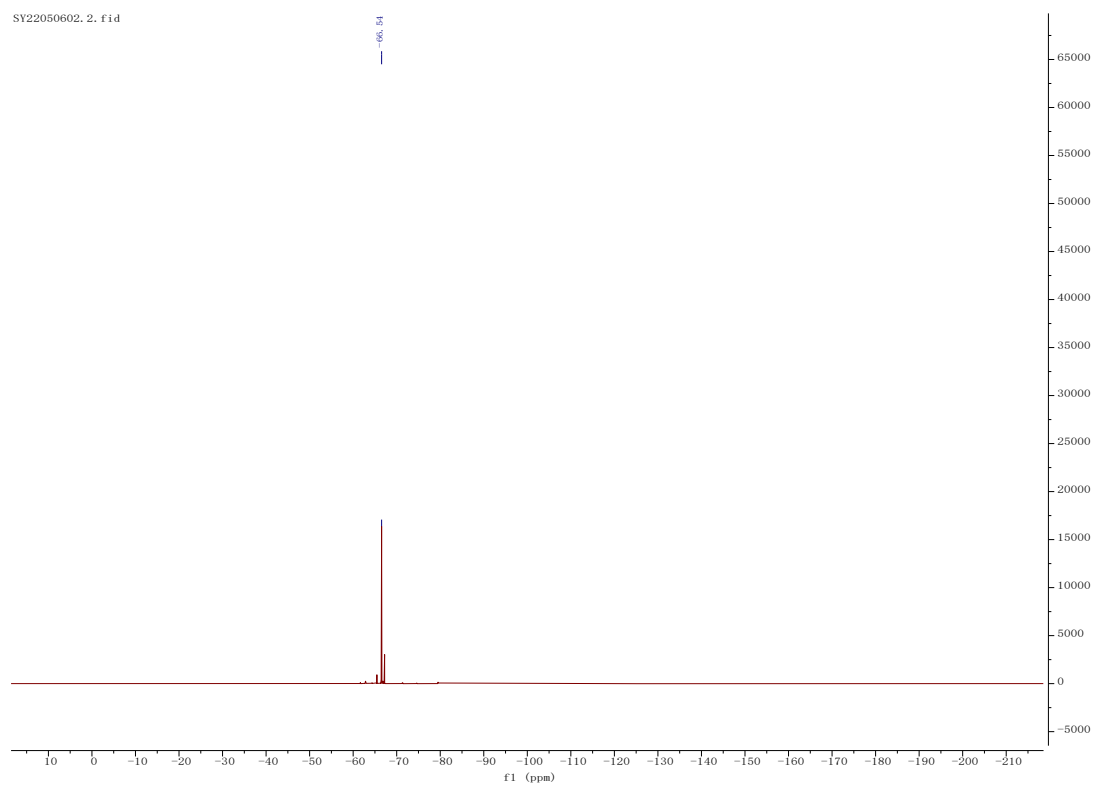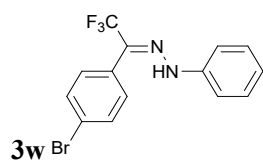





# <sup>13</sup>C NMR

SV21122901 4-so2ch3. 3. fid

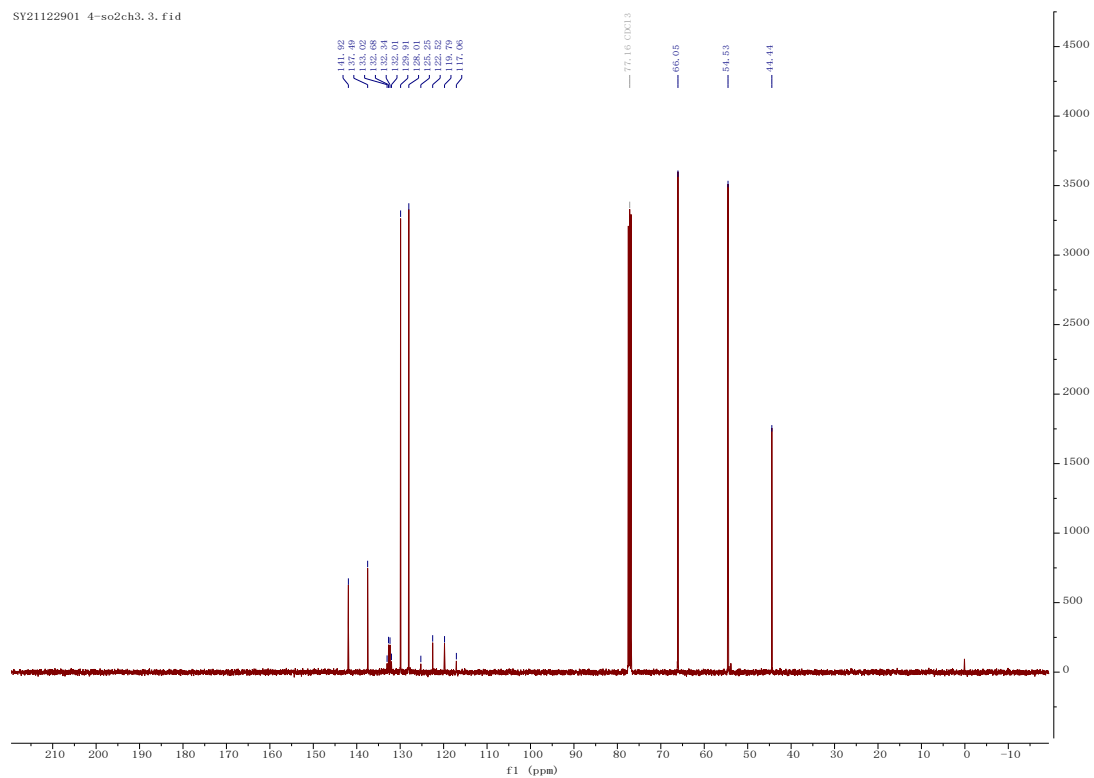

# <sup>19</sup>F NMR

SV21122901 4-so2ch3. 2. fid

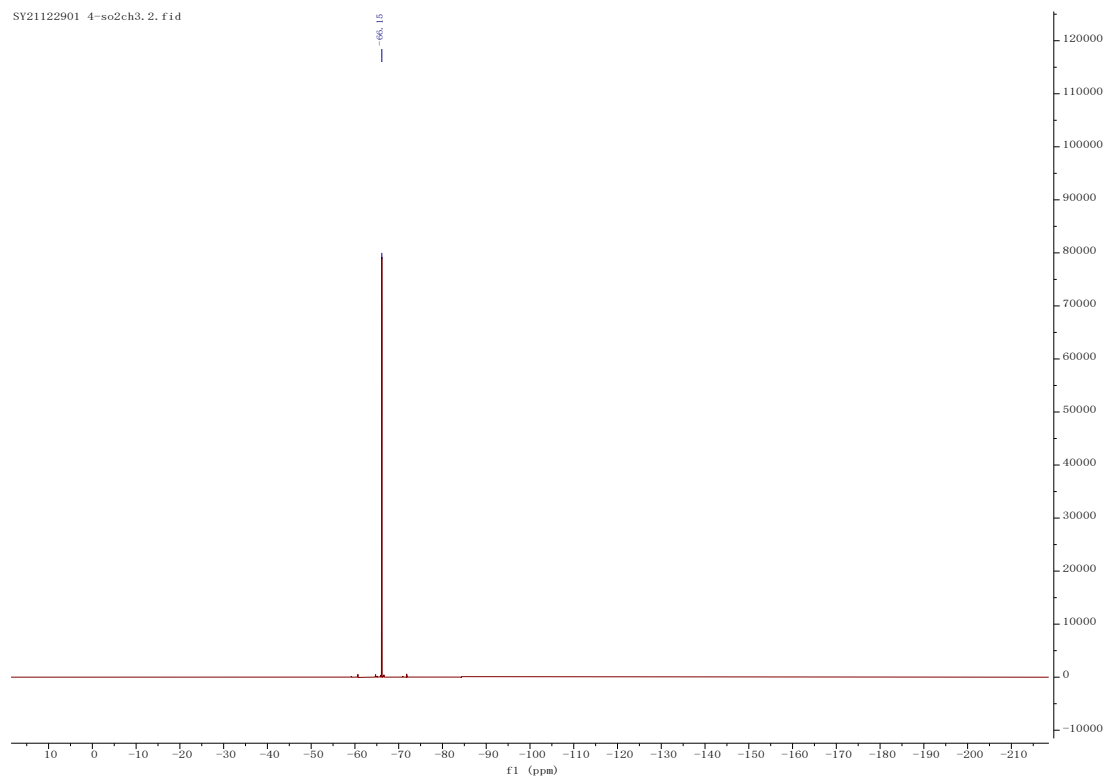

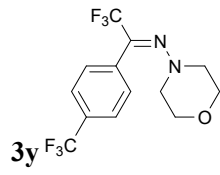

### <sup>1</sup>H NMR

SY220422.1.fid

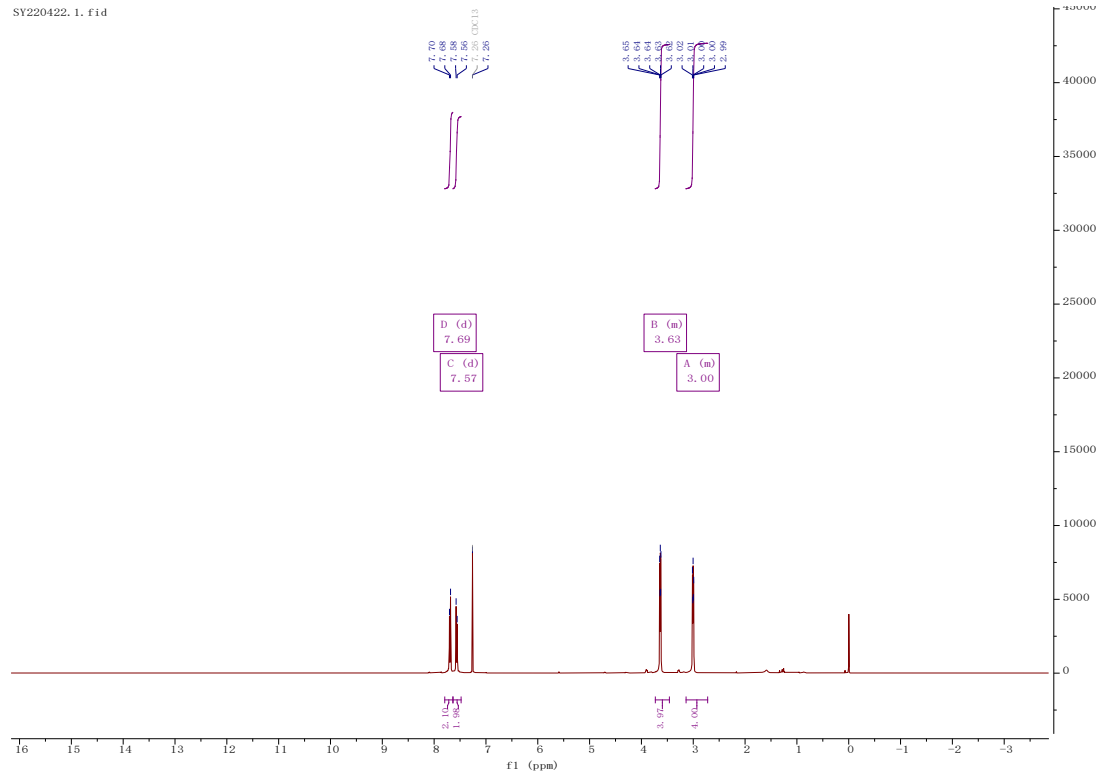

### <sup>13</sup>C NMR

SV220422.2.fid

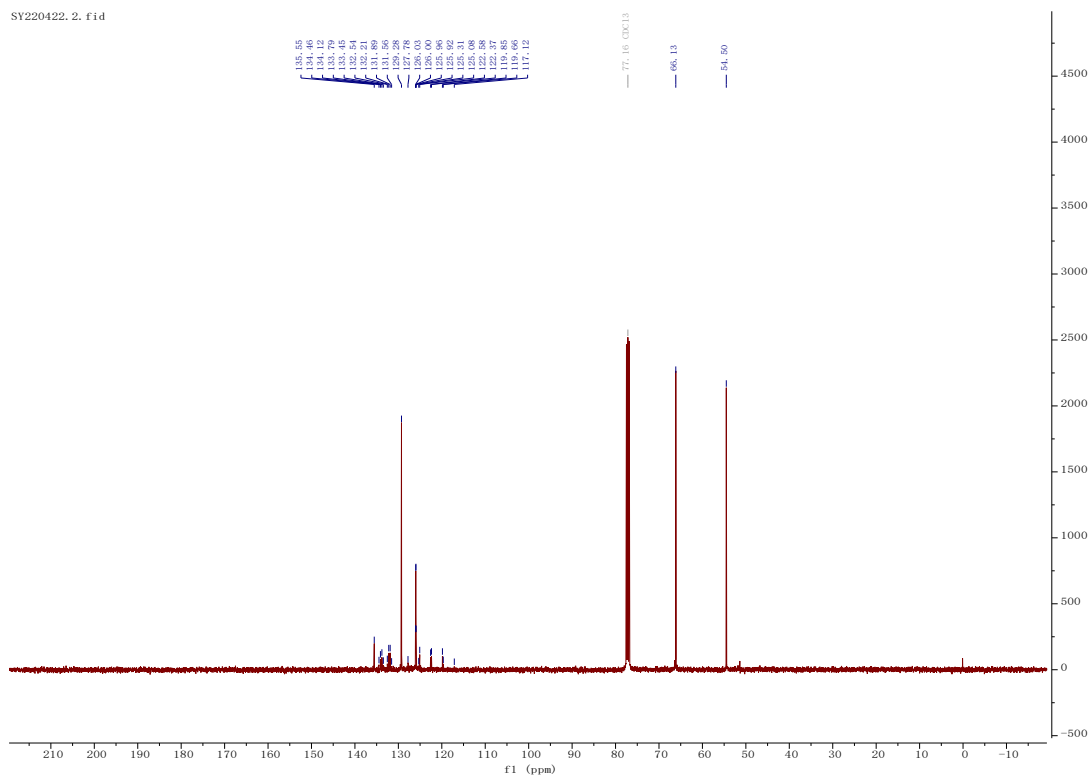

## <sup>19</sup>F NMR

SV220422.3.fid

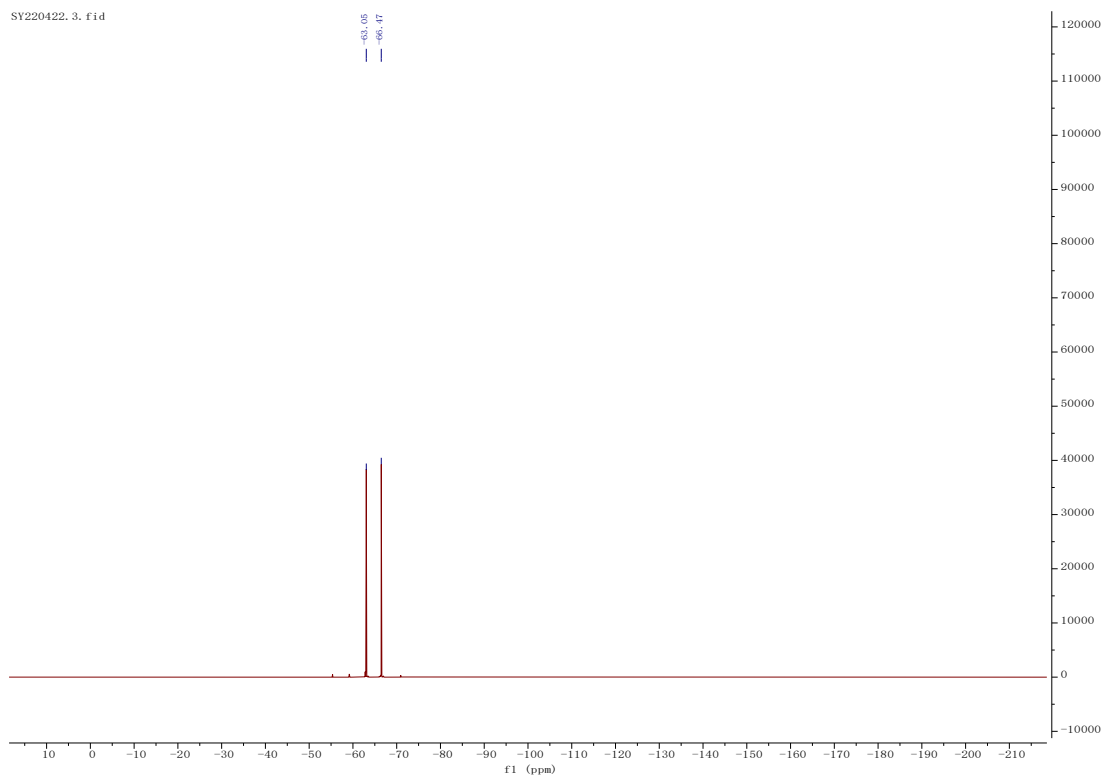

## Reference

- [1] P. Aryal, R. Rafiu, V. P. Reddy, *Journal of Fluorine Chemistry* **2022**, 261-262.
- [2] E. Pair, N. Monteiro, D. Bouyssi, O. Baudoin, *Angew Chem Int Ed Engl* **2013**, 52, 5346-5349.
- [3] B. Huang, X.-S. Bu, J. Xu, J.-J. Dai, Y.-S. Feng, H.-J. Xu, *Asian Journal of Organic Chemistry* **2018**, 7, 137-140.
- [4] Z. Tan, S. Zhang, Y. Zhang, Y. Li, M. Ni, B. Feng, *J Org Chem* **2017**, 82, 9384-9399.
